# Supplementary material
Source: PubMed Central journal article supplement (PMC11114920)
Supplement: 18_2011_628_MOESM1_ESM.pdf [file 18_2011_628_MOESM1_ESM.pdf]

## Supplemental figure legends

**Supplemental figure 1a-f:** Overview of image cytometrie, CGH, and SKY evaluation of analyzed colorectal cancer cell lines LoVo, DLD-1, HCT116, HT-29, COLO 201, and T84. n.a., not available.

**Supplemental figure 2:** Screenshot from the PDQuest analysis software (a) and representative gel images of a diploid and an aneuploid cell line (b). The inter-individual expression of HDAC2, CAPZA1, and TXNL1 is shown through representative match-set members. The two sub-entities are highlighted in red (aneuploid) and blue (diploid).

**Supplemental figure 3:** Expression of aneuploid and diploid cell lines for significant proteins. Dots represent median expression of replicates for a single cell line and lines show weighted mean of aneuploid and diploid cell lines.

**Supplemental figure 4:** IPA network 2 (Score 23) of 10 proteins differentially expressed between diploid and aneuploid colorectal cell lines. Red highlighted proteins are higher expressed in the aneuploid group, green ones are lower expressed in the aneuploid group. Please note the overall association of this network with functions (FX) and canonical pathways (CP) related to cancer, polyploidization and senescence. This network overlaps with network 1 (blue). Proteins accompanied by red and green ovals were prone to Western Blot evaluation with the red one reaching significance.

**Supplemental figure 5:** Western Blots analysis of GNAS (a) and PRDX2 (b) expression in colorectal cell lines including non-specific bands for the respective protein. Red frames mark the specific band of the proteins that was used for evaluation. None of the unspecific bands showed significant differences between diploid (LoVo, DLD-1, HCT116) and aneuploid (HT-29, COLO 201, T84, Caco-2) cell lines.

**Supplemental figure 6:** Tissue-Microarray based immunohistochemical evaluation of HDAC2, CAPZA1, and TXNL1 comparing all sporadic colorectal carcinoma specimens versus adjacent normal mucosa. Immunoreactivity was scored with "0" showing no positivity, "1" presenting up to 20% immunopositive cells, "2" up to 50% and "3" above 50% stained cells. Barplots of the TMA analysis confirmed HDAC2 and TXNL1 as significantly (\*) differentially expressed proteins between colorectal carcinoma and normal mucosa.

**Supplemental figure 7:** Tissue-Microarray based immunohistochemical evaluation of HDAC2, CAPZA1, and TXNL1 comparing diploid and aneuploid sporadic colorectal carcinoma specimens versus adjacent normal mucosa. Immunoreactivity was scored with "0" showing no positivity, "1" presenting up to 20% immunopositive cells, "2" up to 50% and "3" above 50% stained cells.

**Supplemental figure 8a-y:** Annotated spectra of all identified protein spots. Please notice that supplemental figure 6n is compromised of two identities (DCPS and UBP1) that were pooled by experimental mistake.

**Supplemental table legends**

**Supplemental table 1:** Details on cell culture.

**Supplemental table 2a-e:** Peak lists of all identified protein spots. Matched peptides are marked in red with peptide assignment in brackets. Methionine oxidation is labeled with Mox. Please notice that supplemental table 2e includes the peak list of DCPS and UBP1 that were pooled by experimental mistake. Here, matched peptides of DCPS are highlighted in green and matched peptides of UBP1 are highlighted in red.

Supplemental figures

Supplemental figure 1a

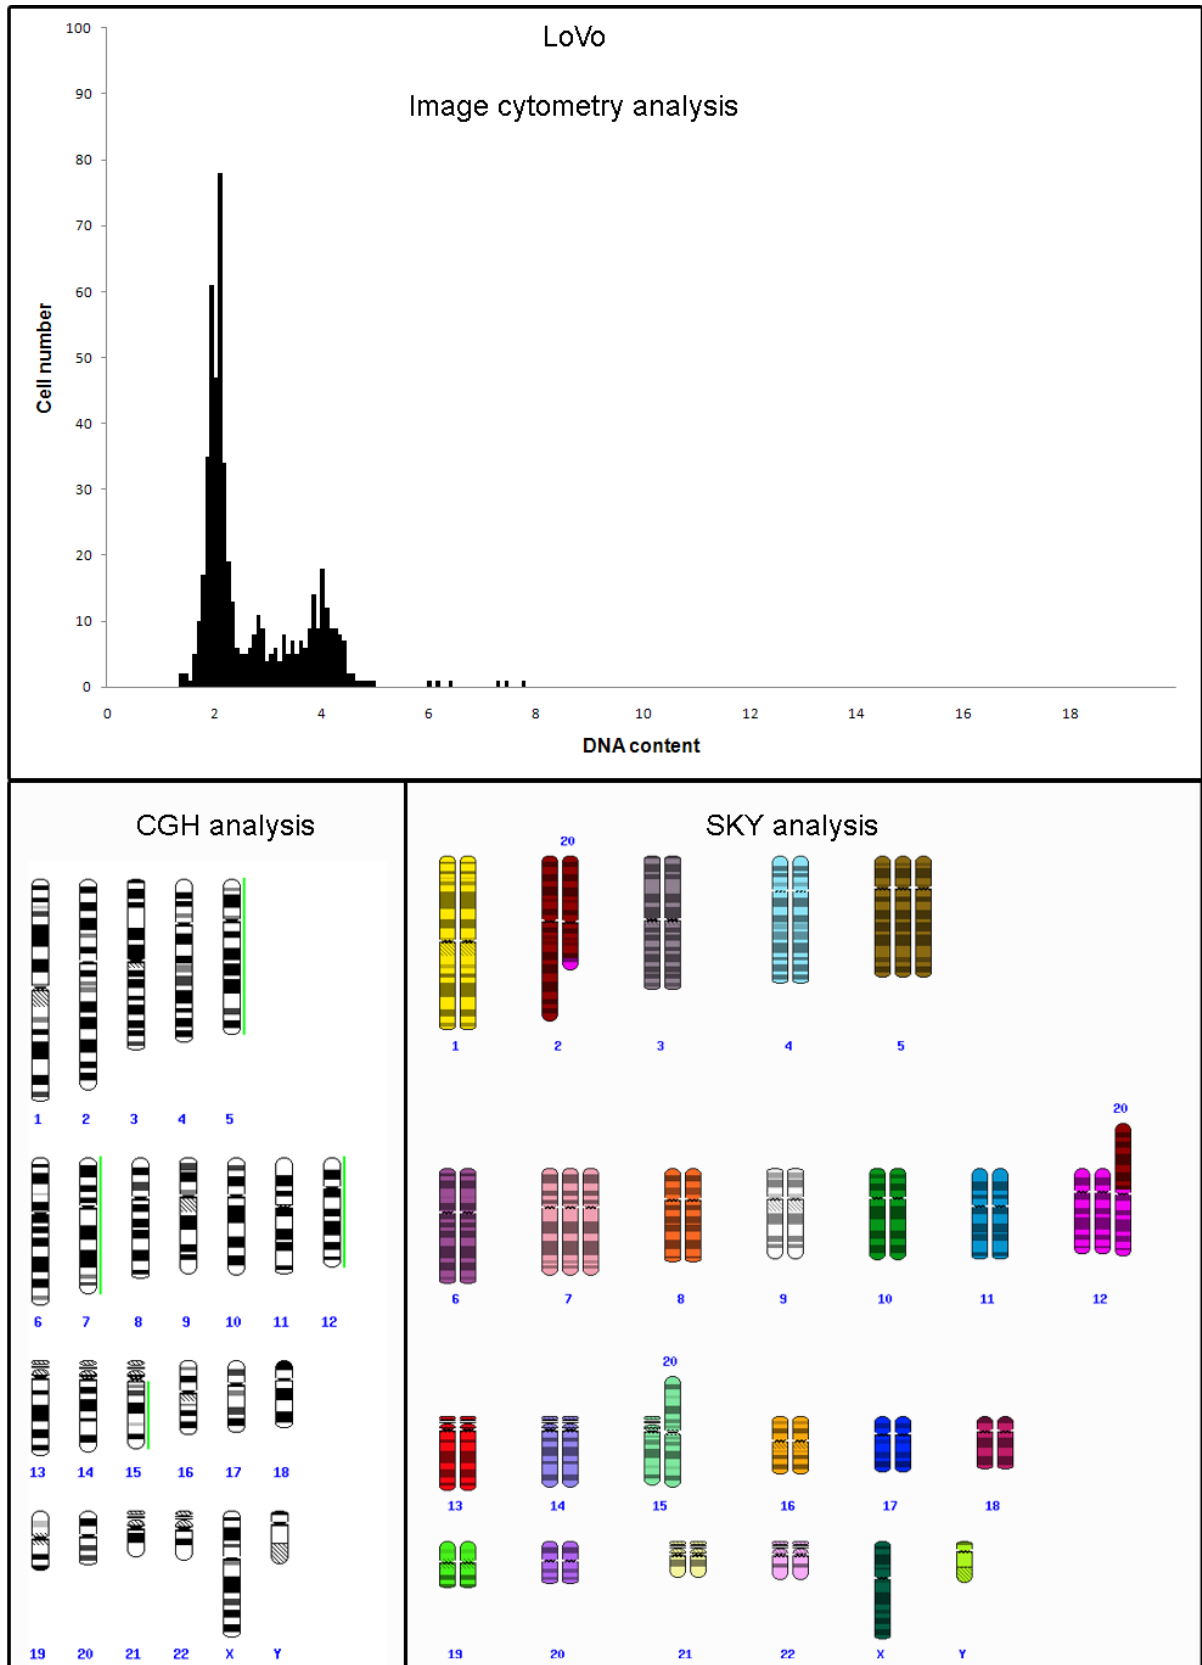

Supplemental figure 1b

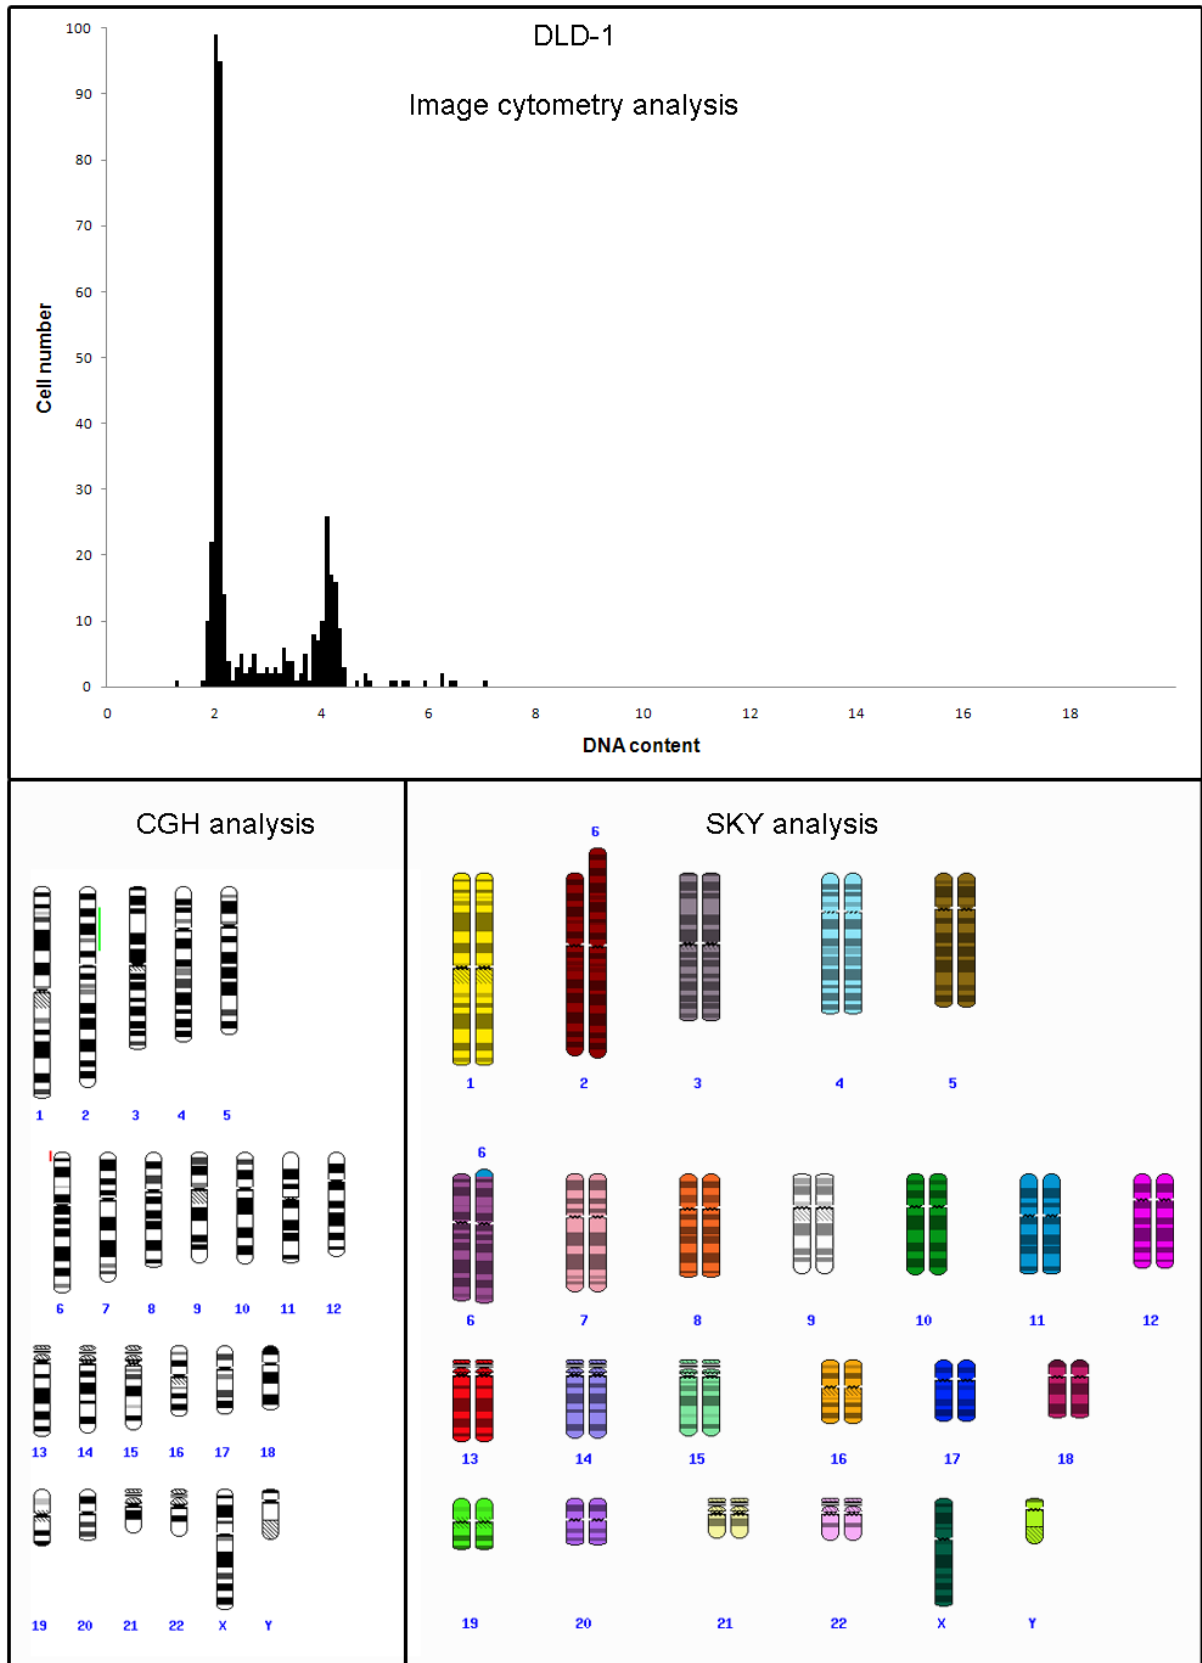

Supplemental figure 1c

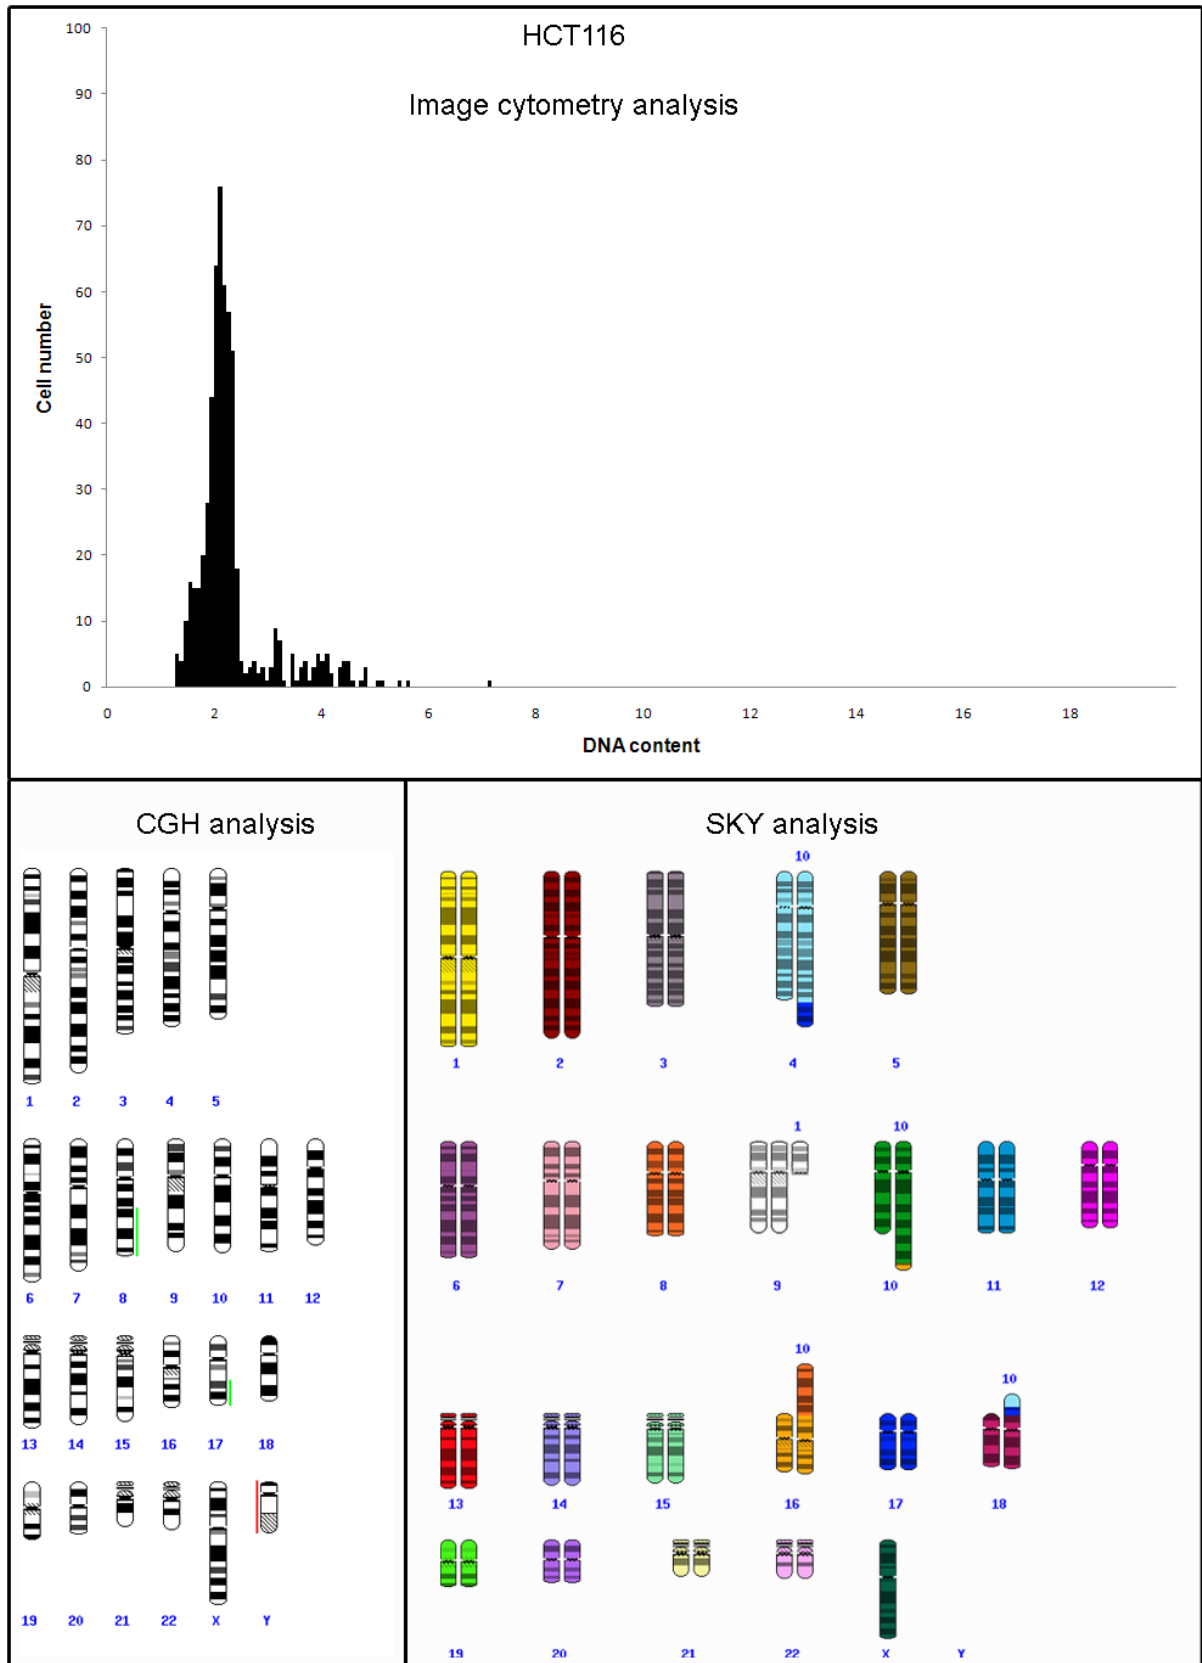

Supplemental figure 1d

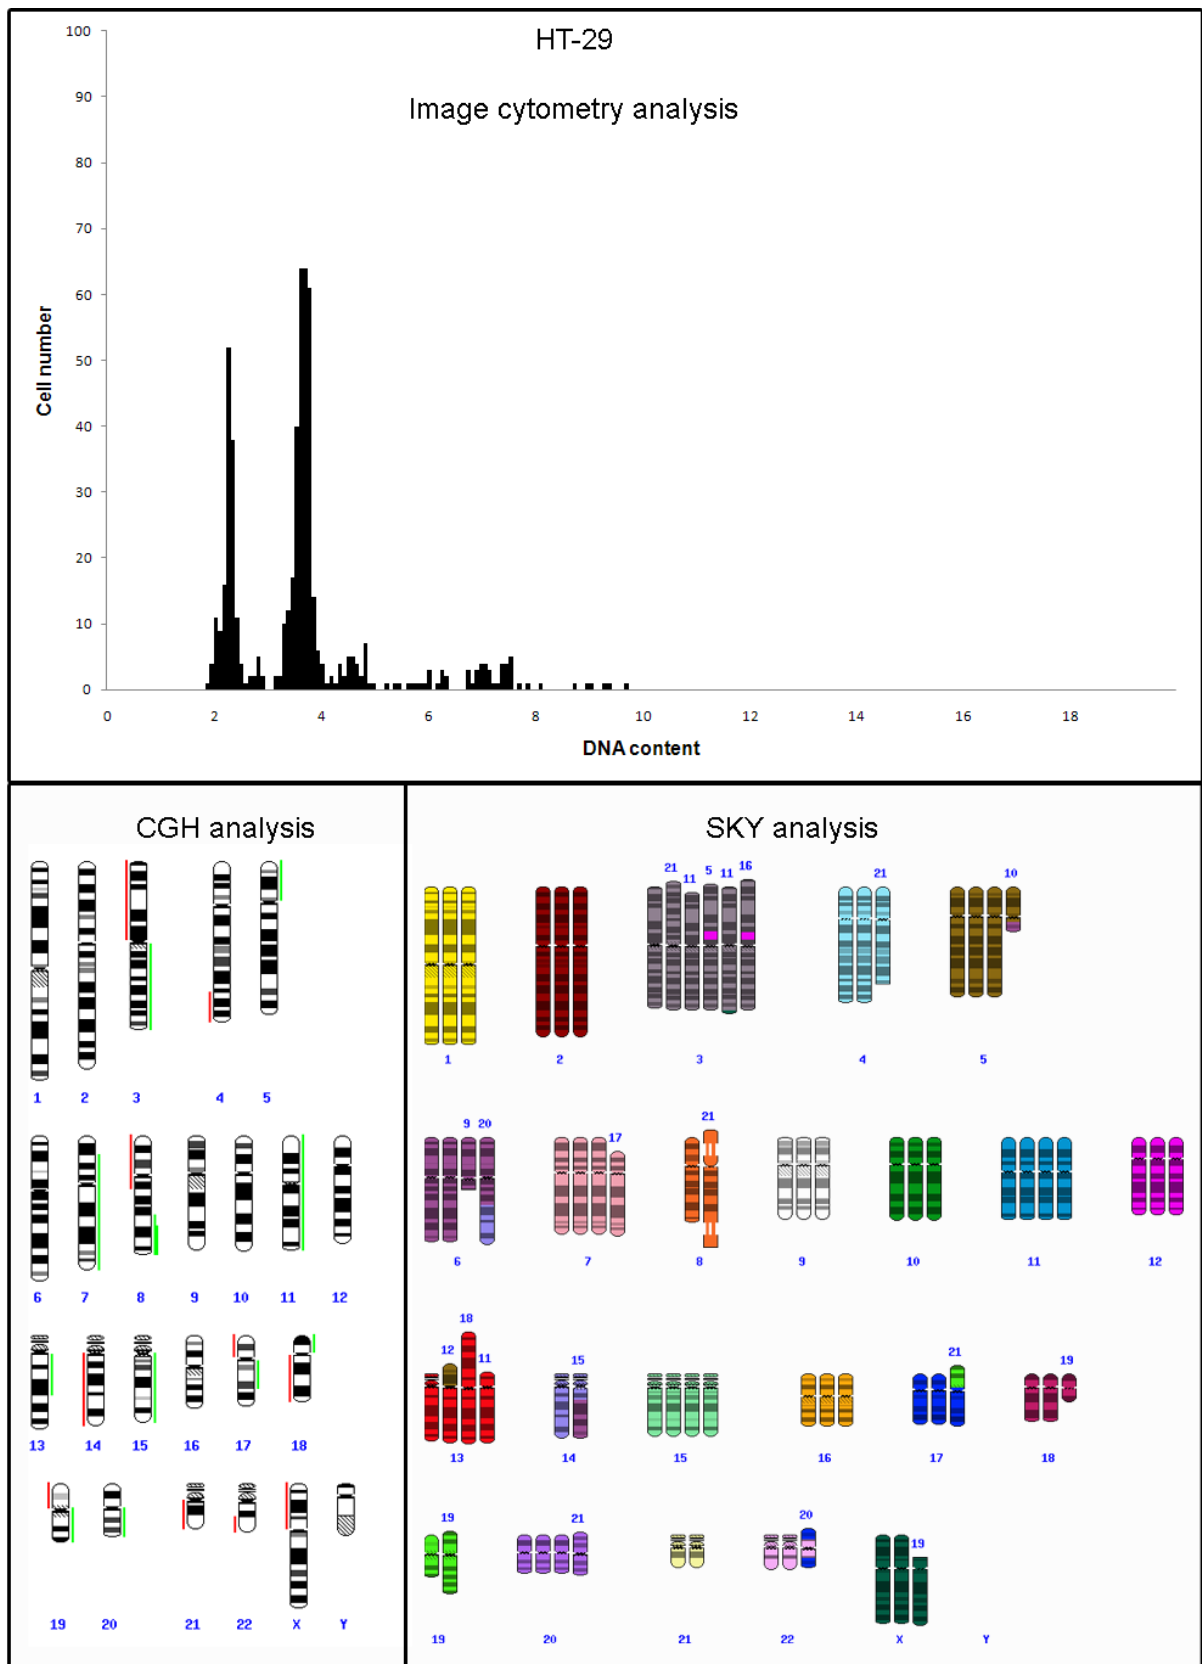

Supplemental figure 1e

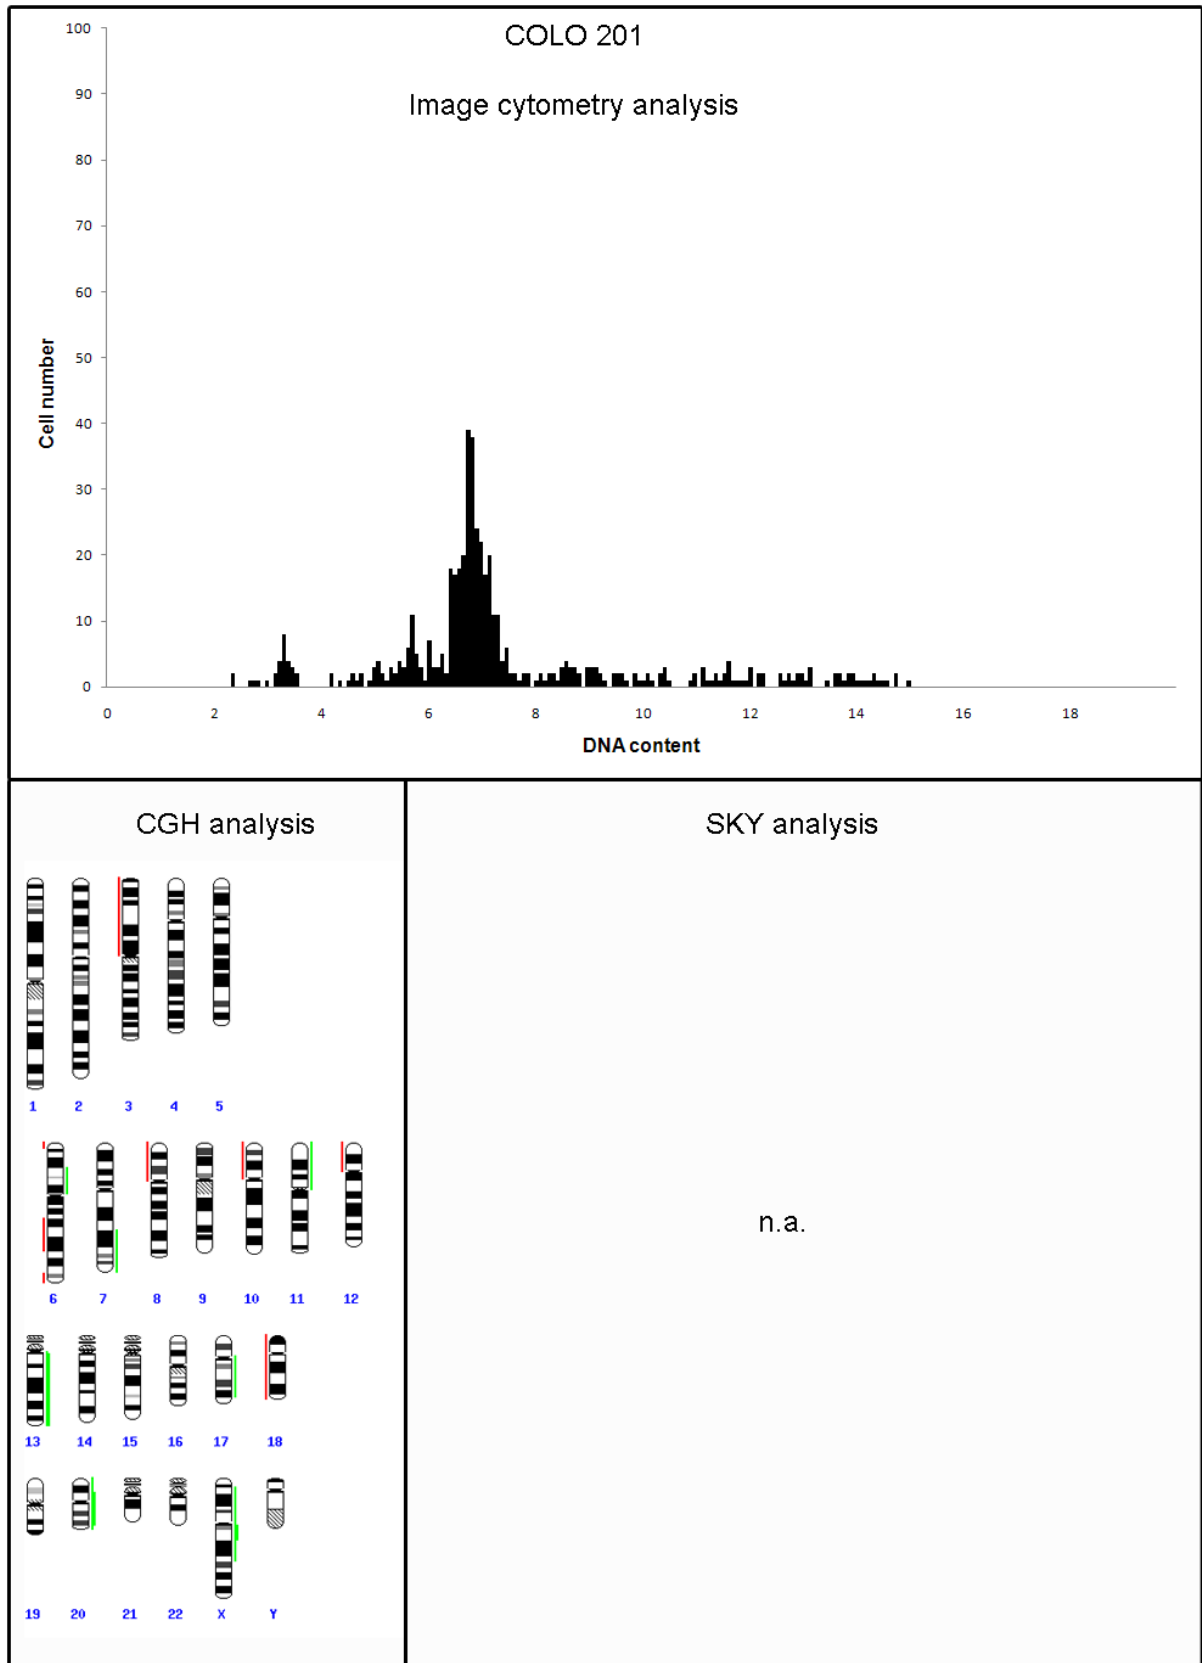

Supplemental figure 1f

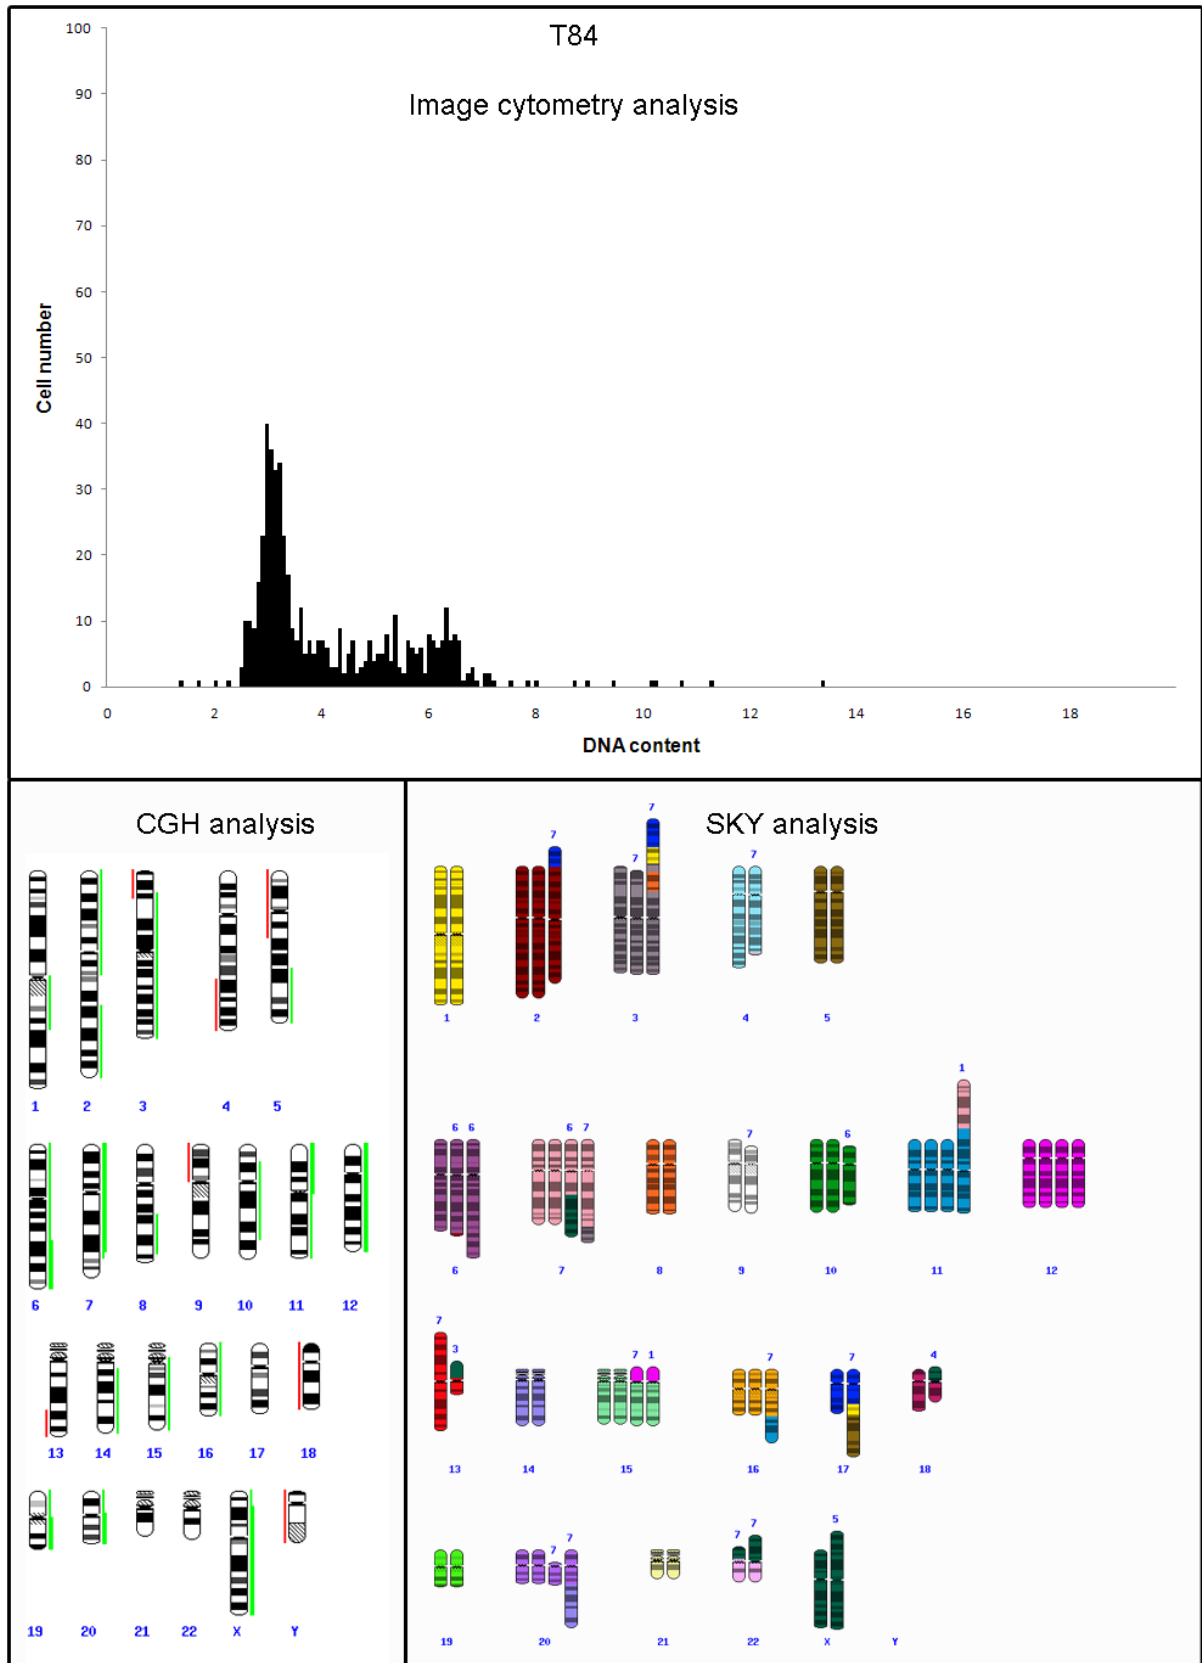



## Supplemental figure 2

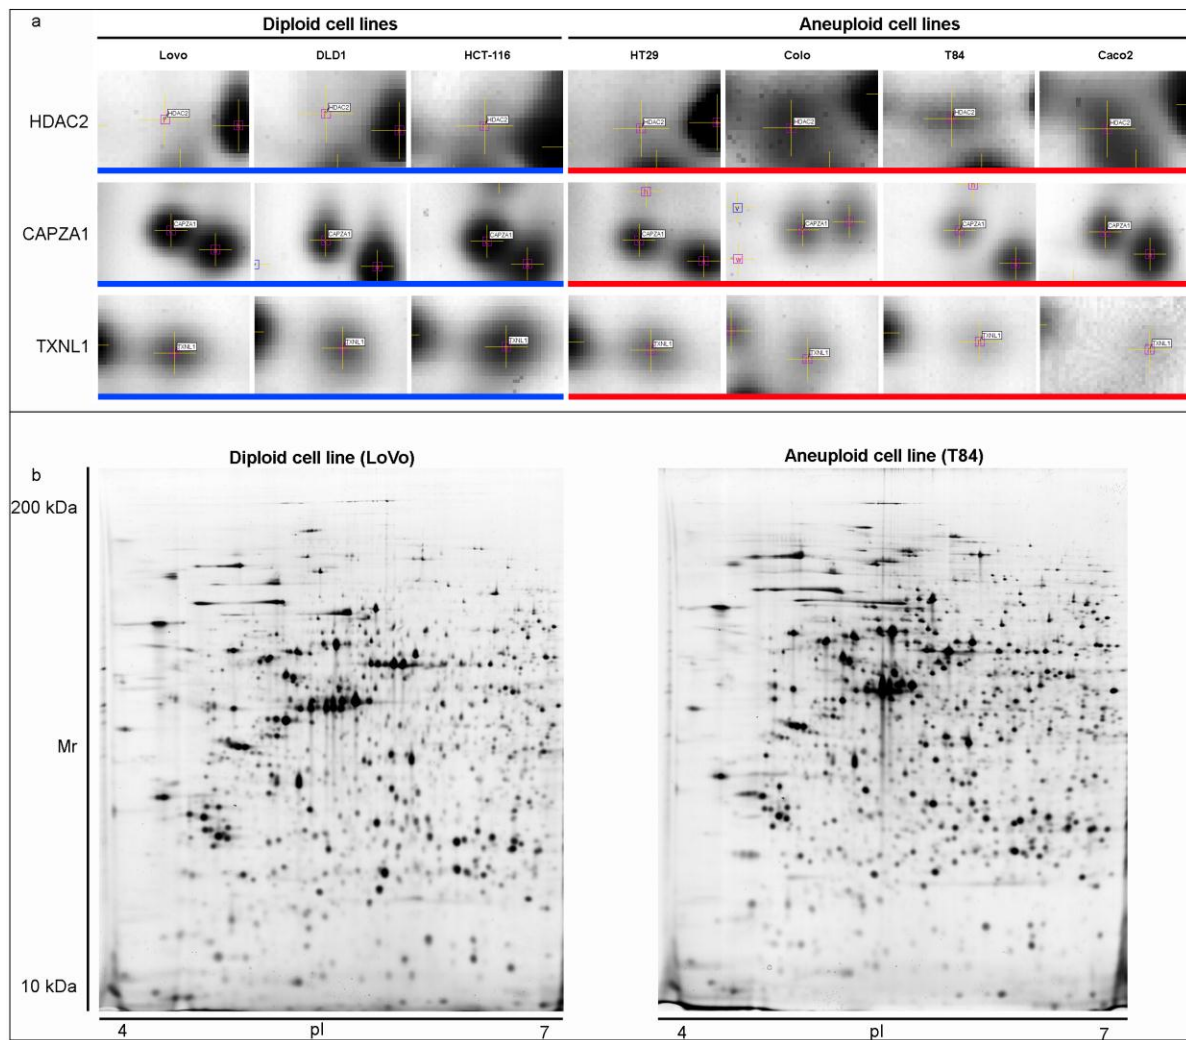

## Supplemental figure 3

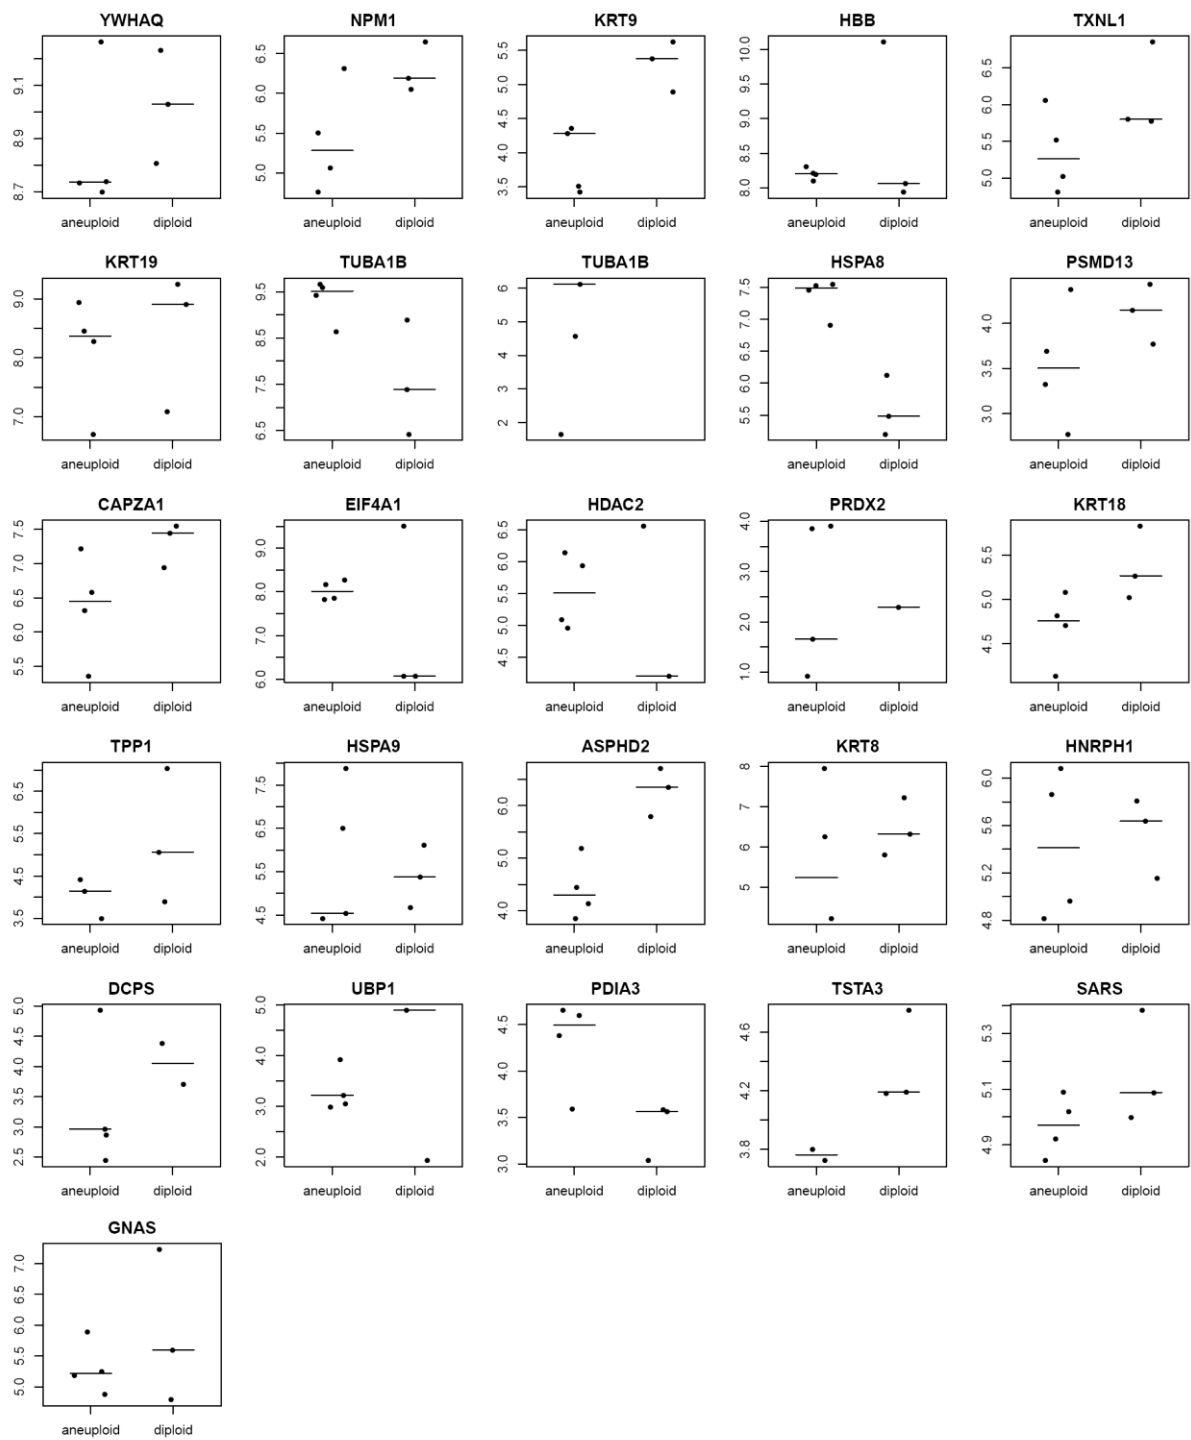

Supplemental figure 4

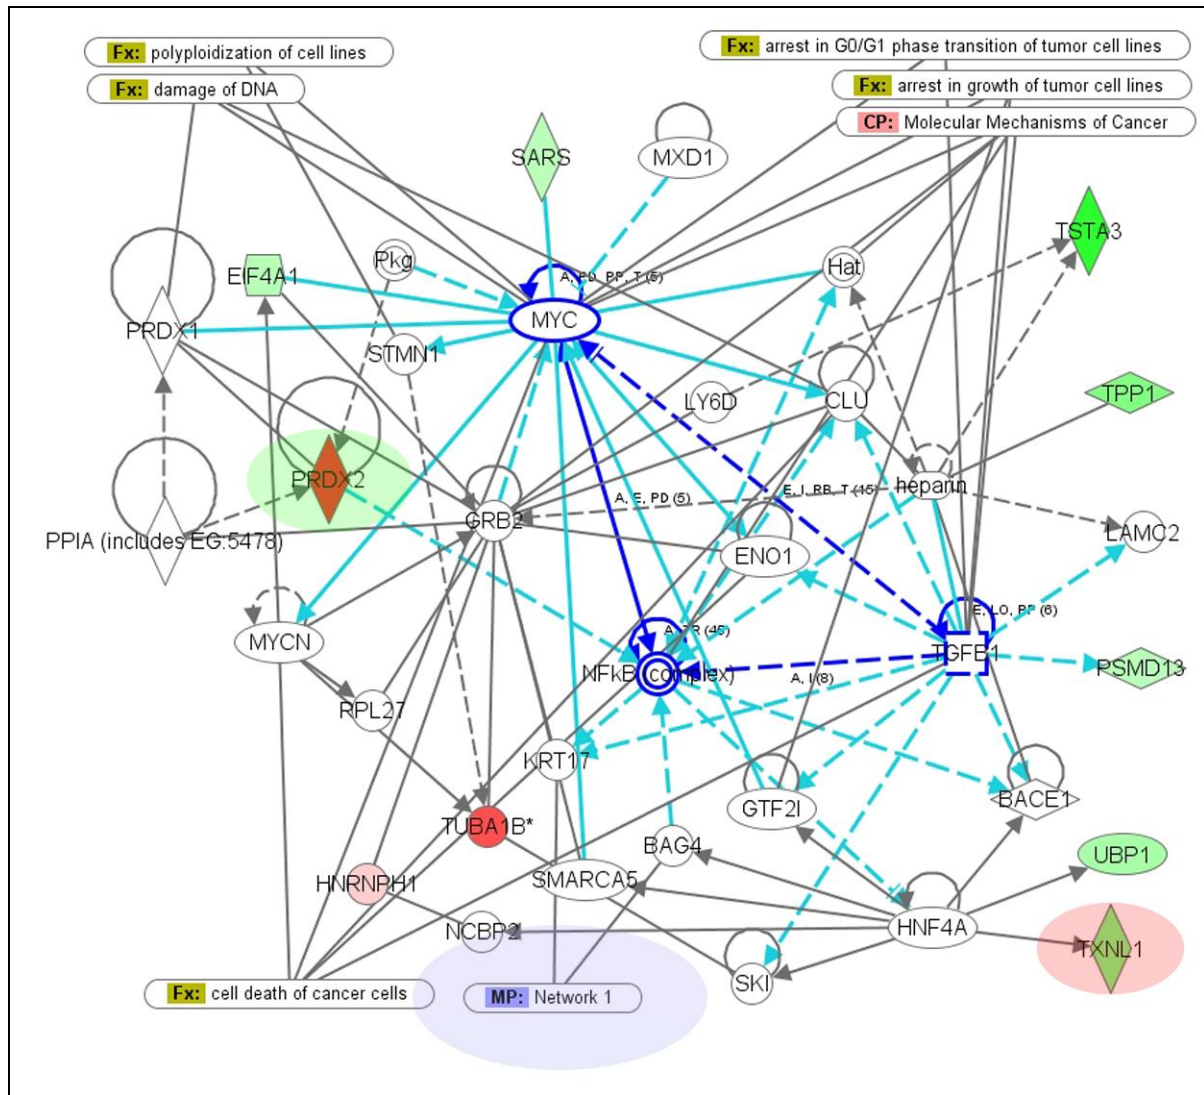

## Supplemental figure 5

a

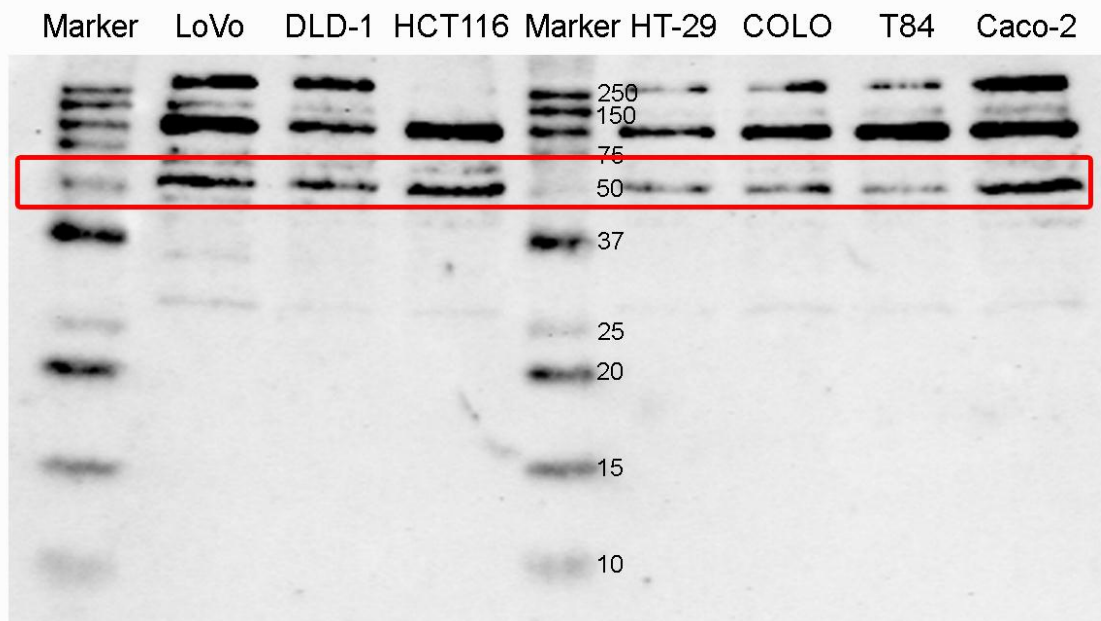

b

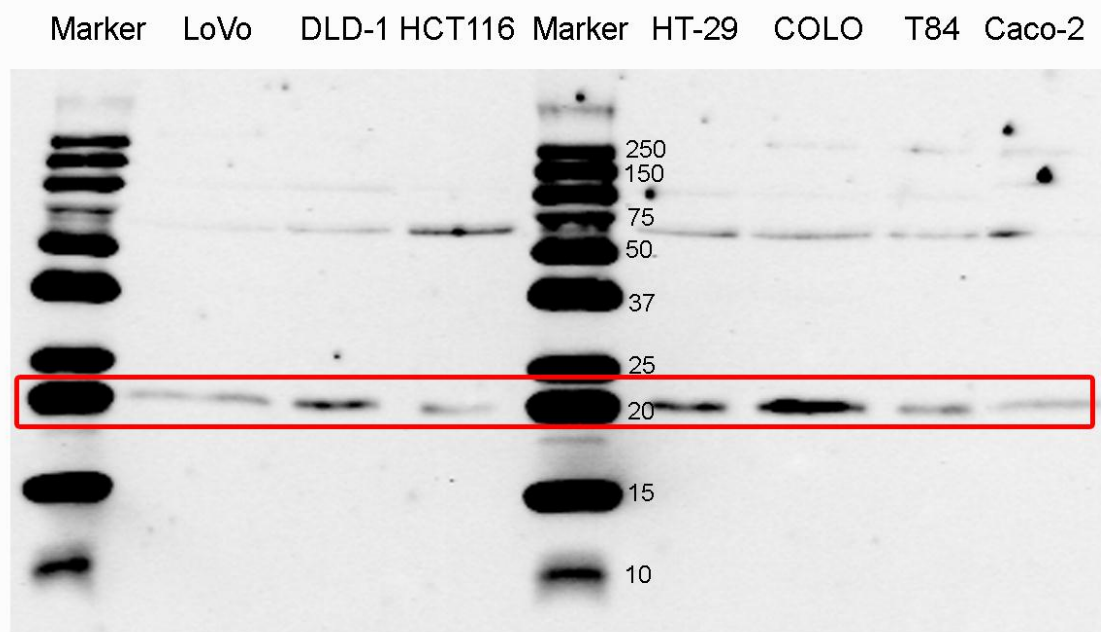

## Supplemental figure 6

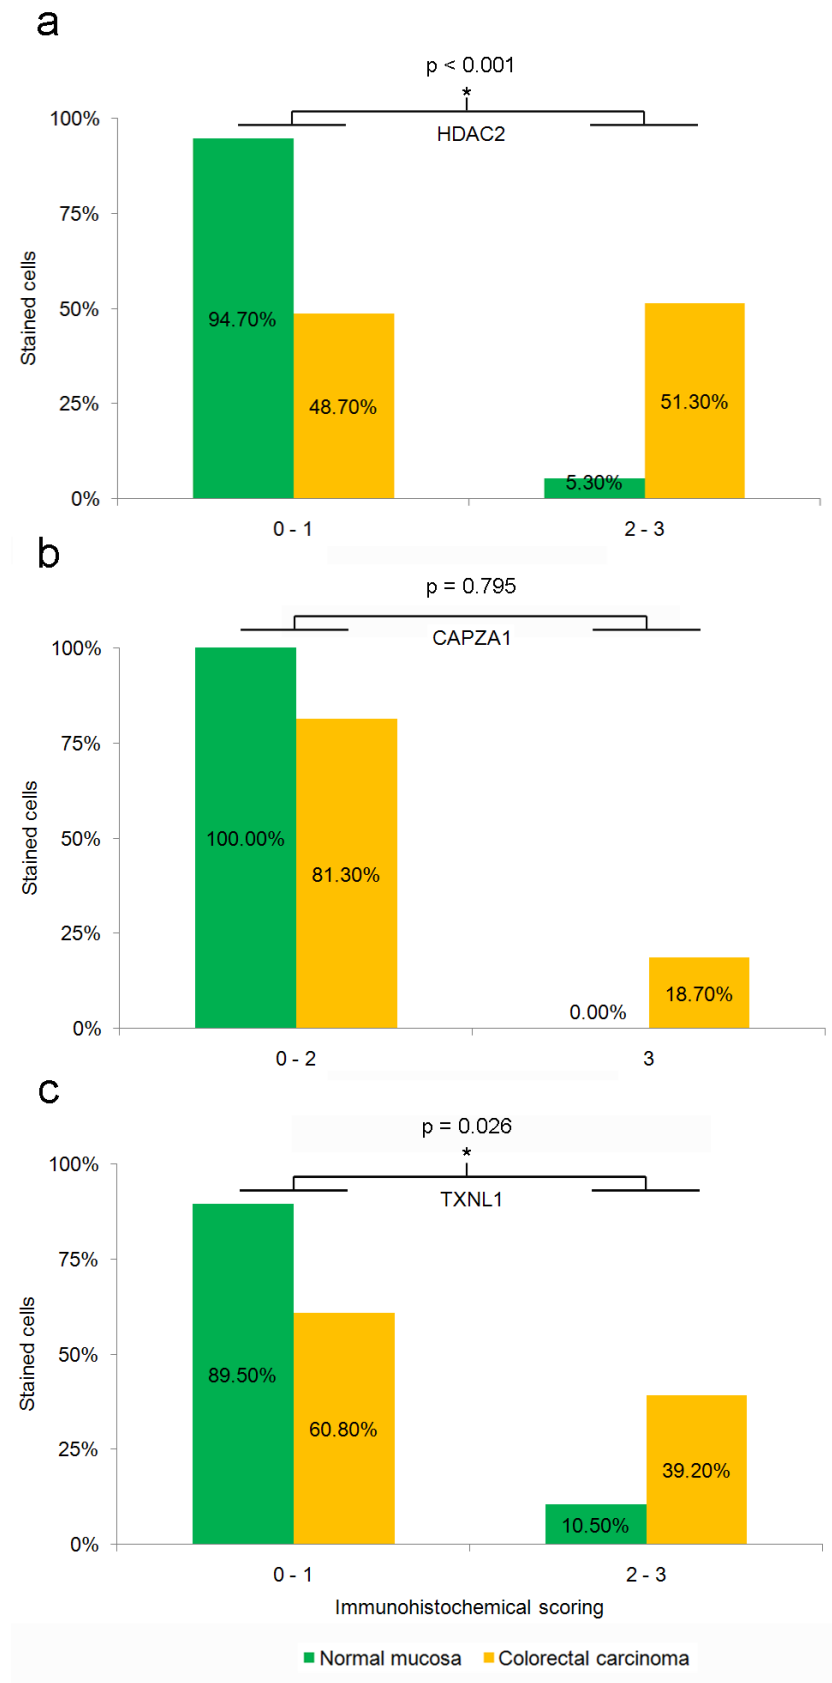

Supplemental figure 7

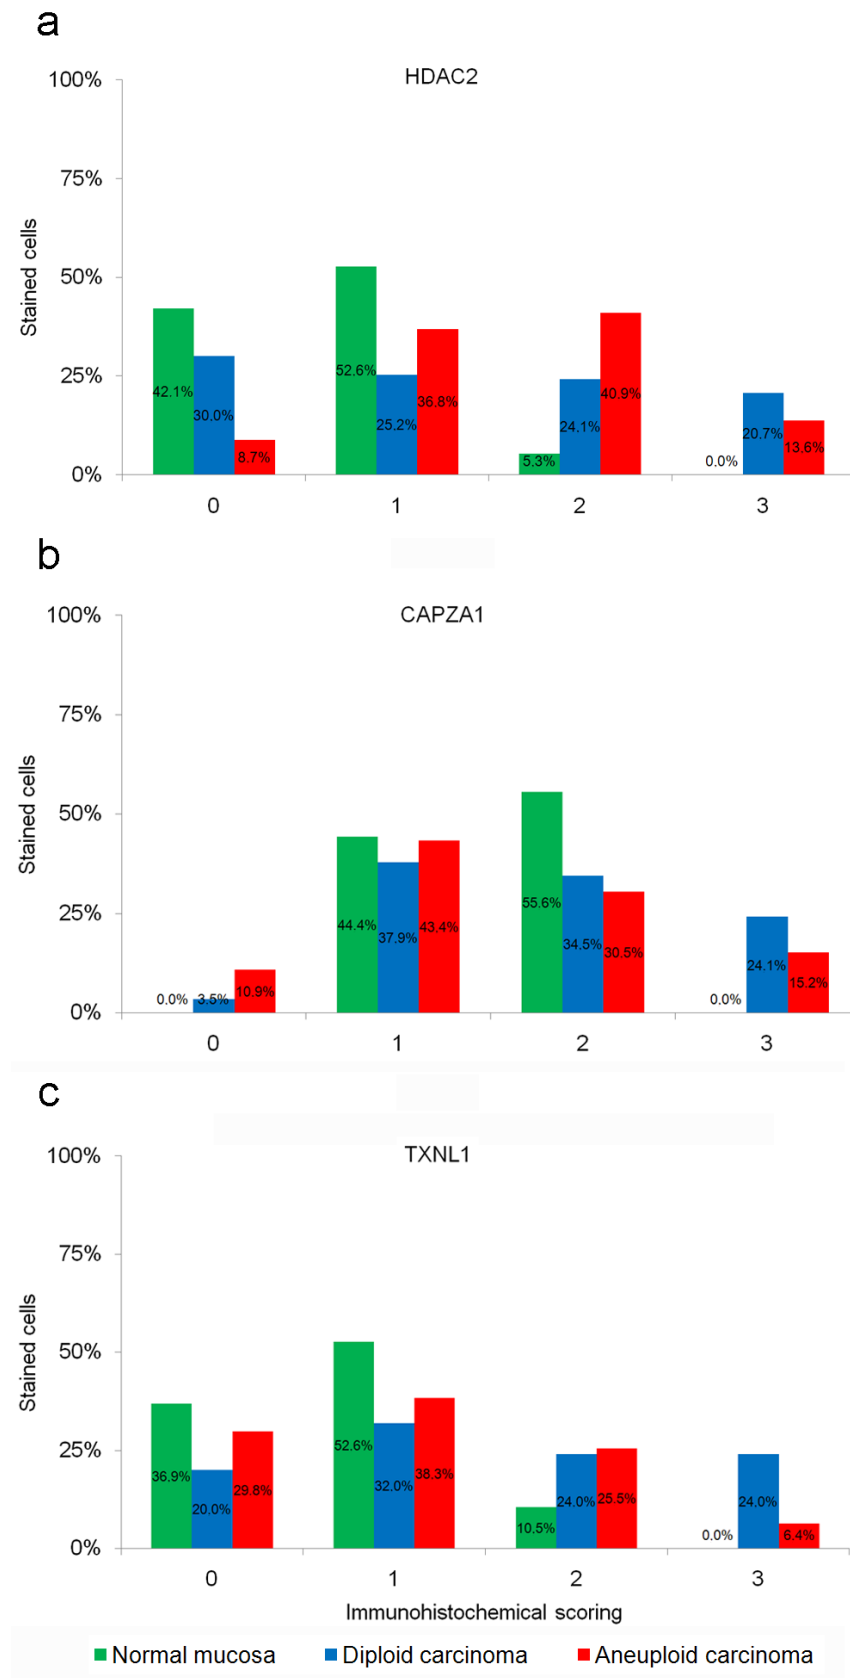

Supplemental figure 8a: 14-3-3, NP\_006752

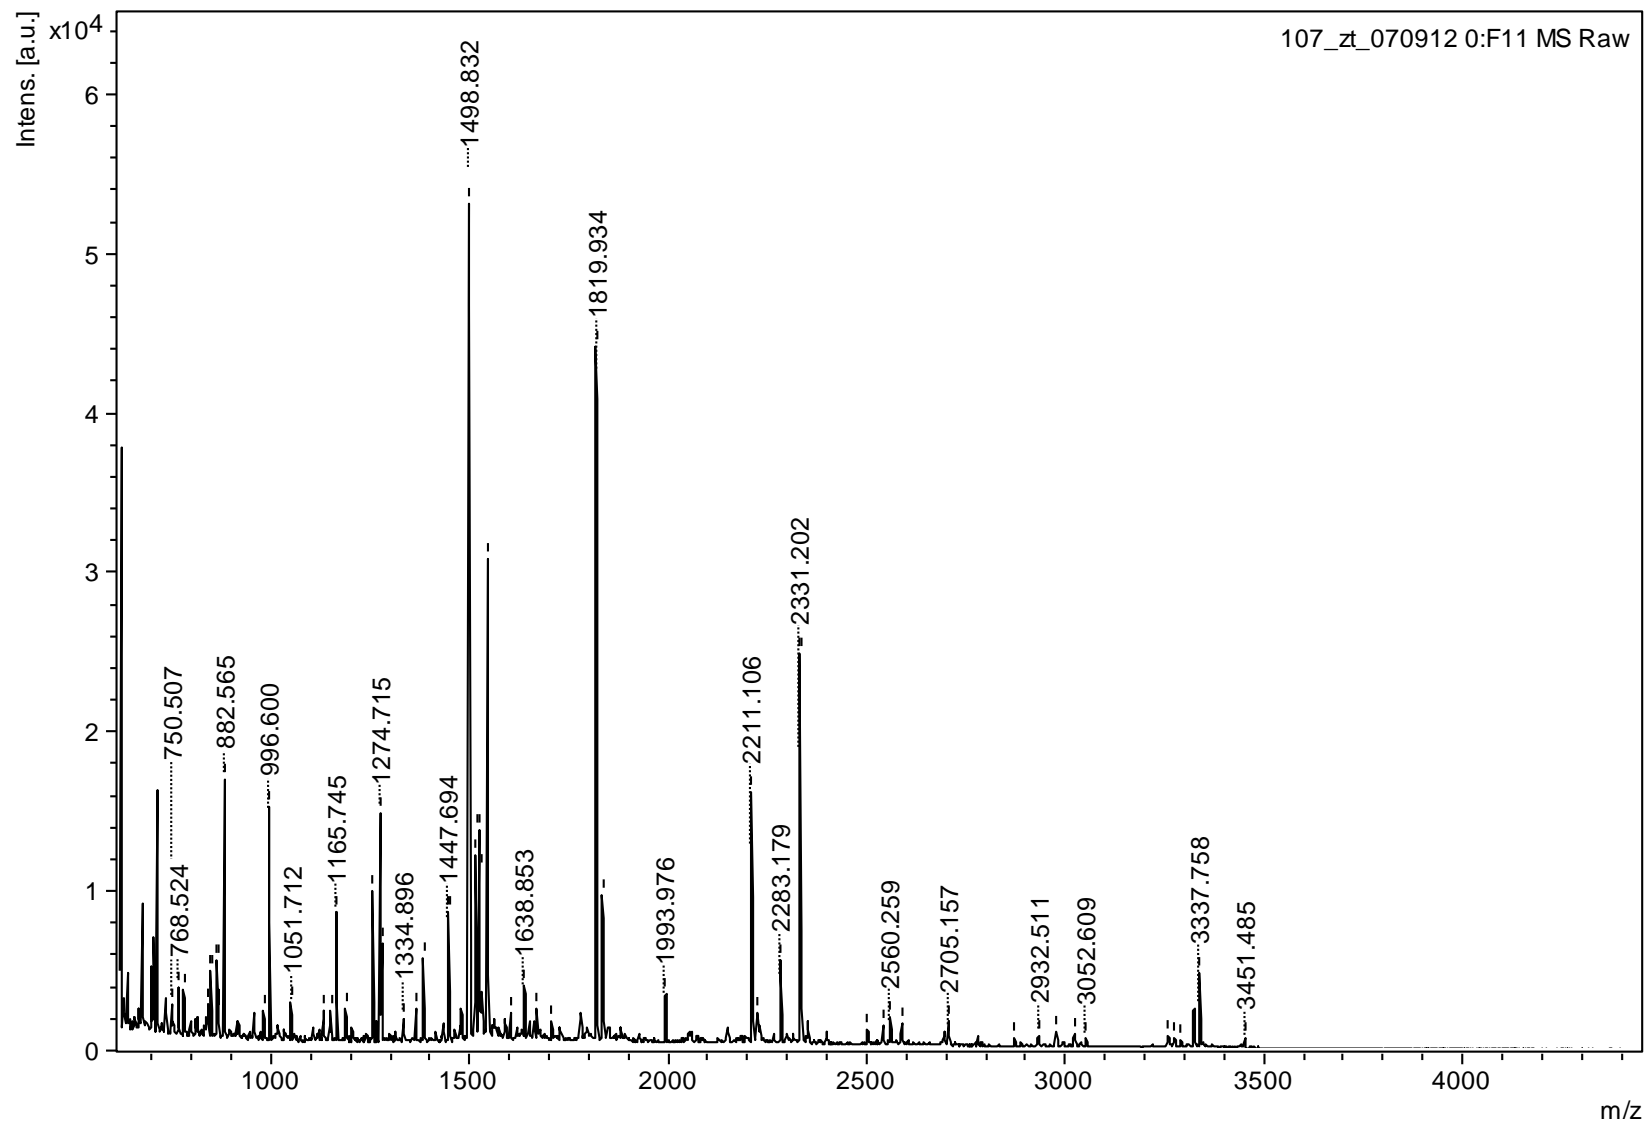

Supplemental figure 8b: Thioredoxin-like 1, NP\_004777

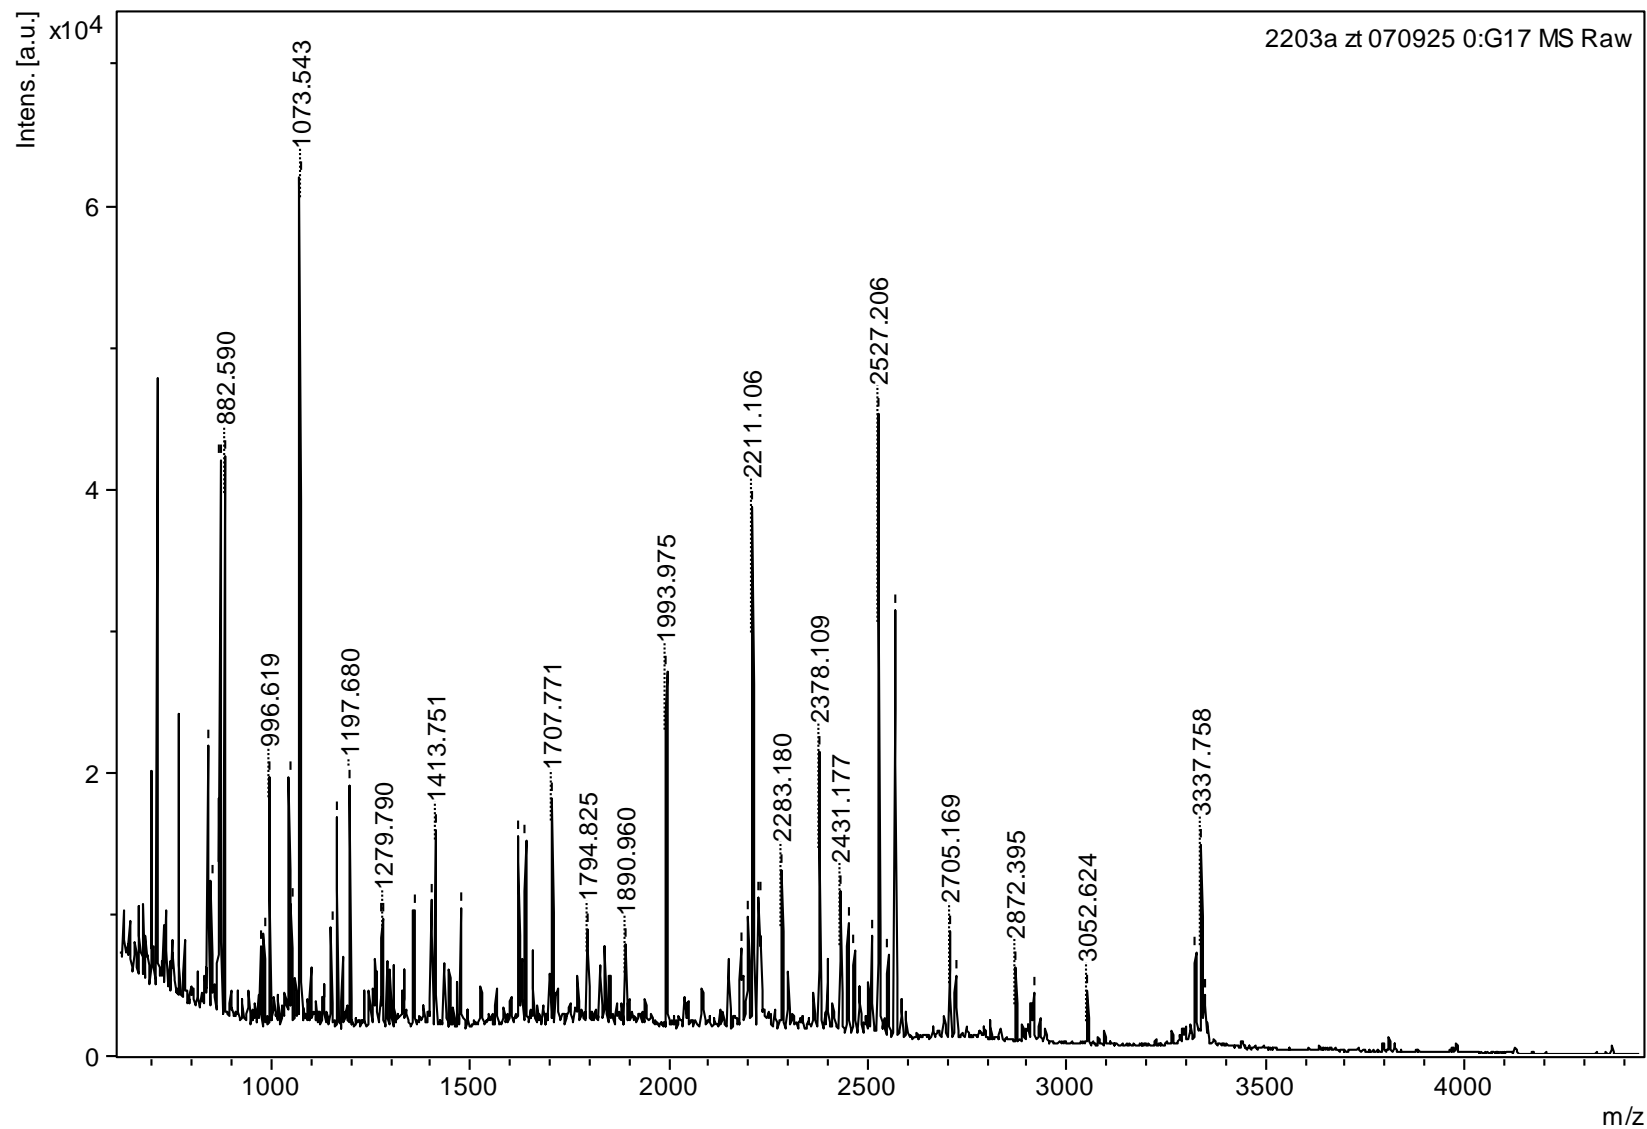



Supplemental figure 8c: Capping protein muscle Z-line alpha 1, NP\_006126

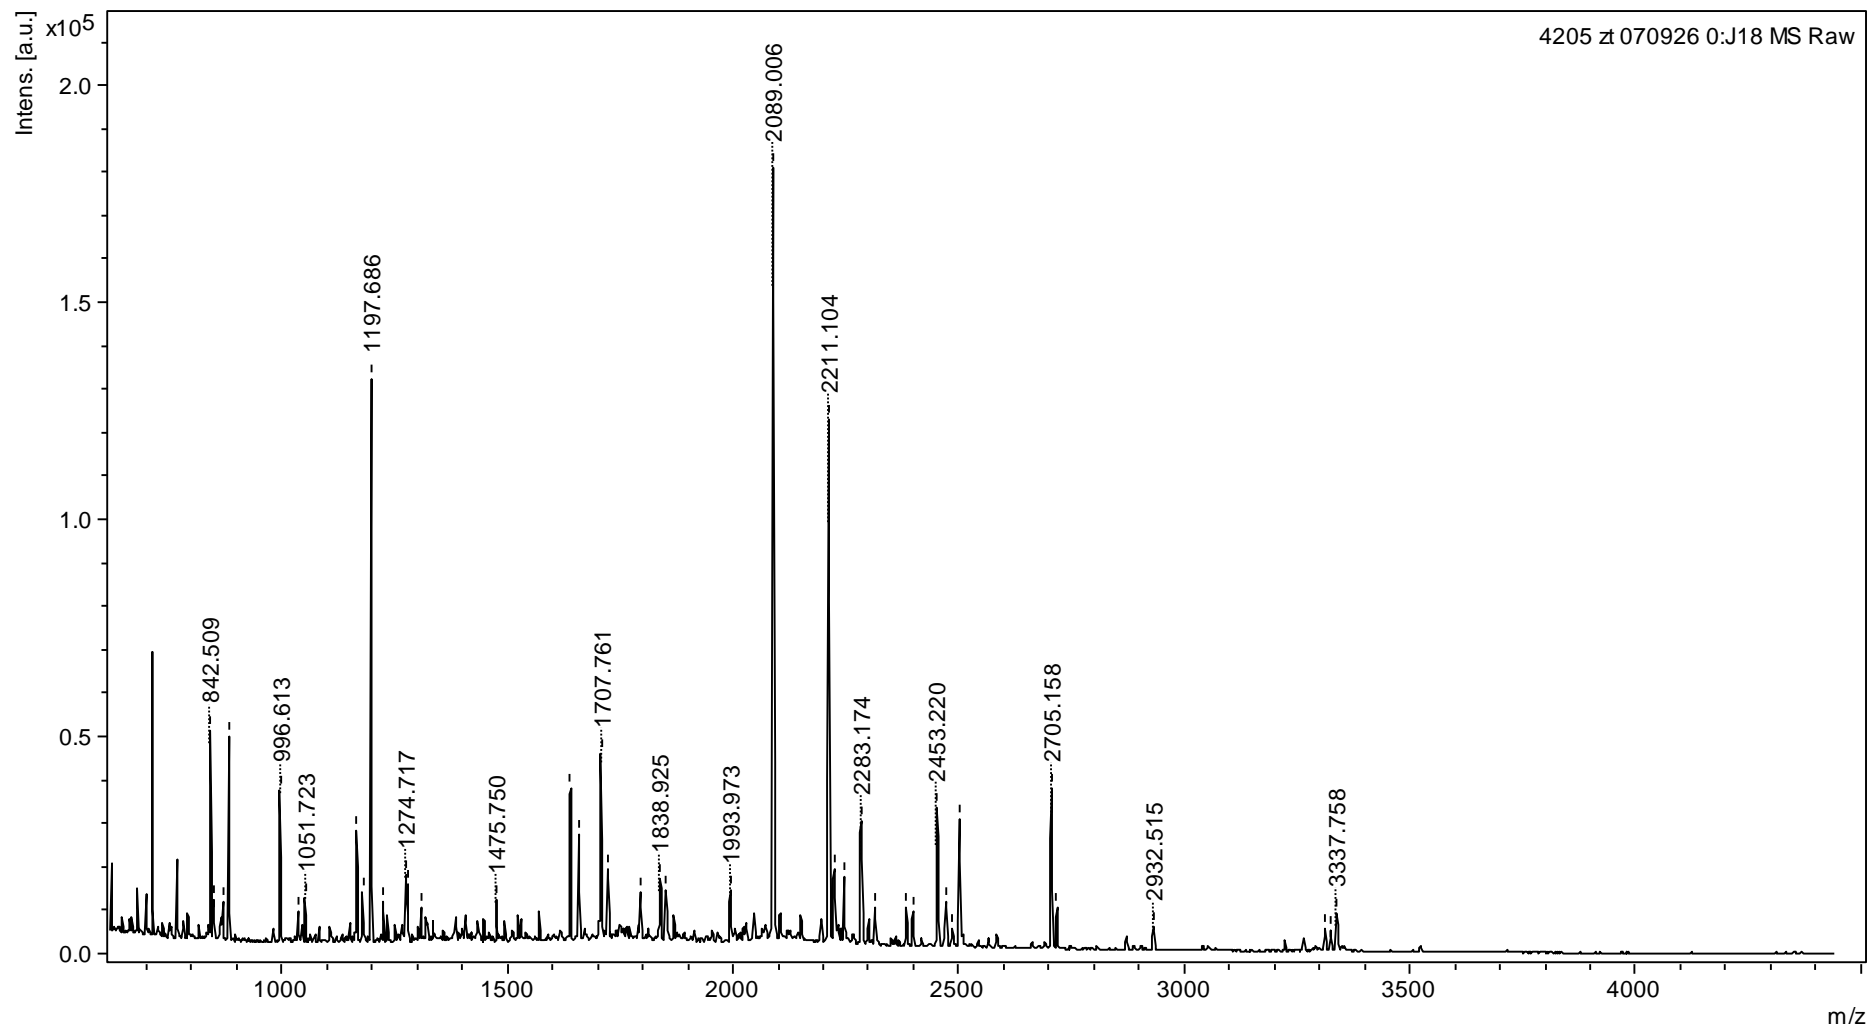

Supplemental figure 8d: Aspartate beta-hydroxylase domain containing 2, NP\_065170

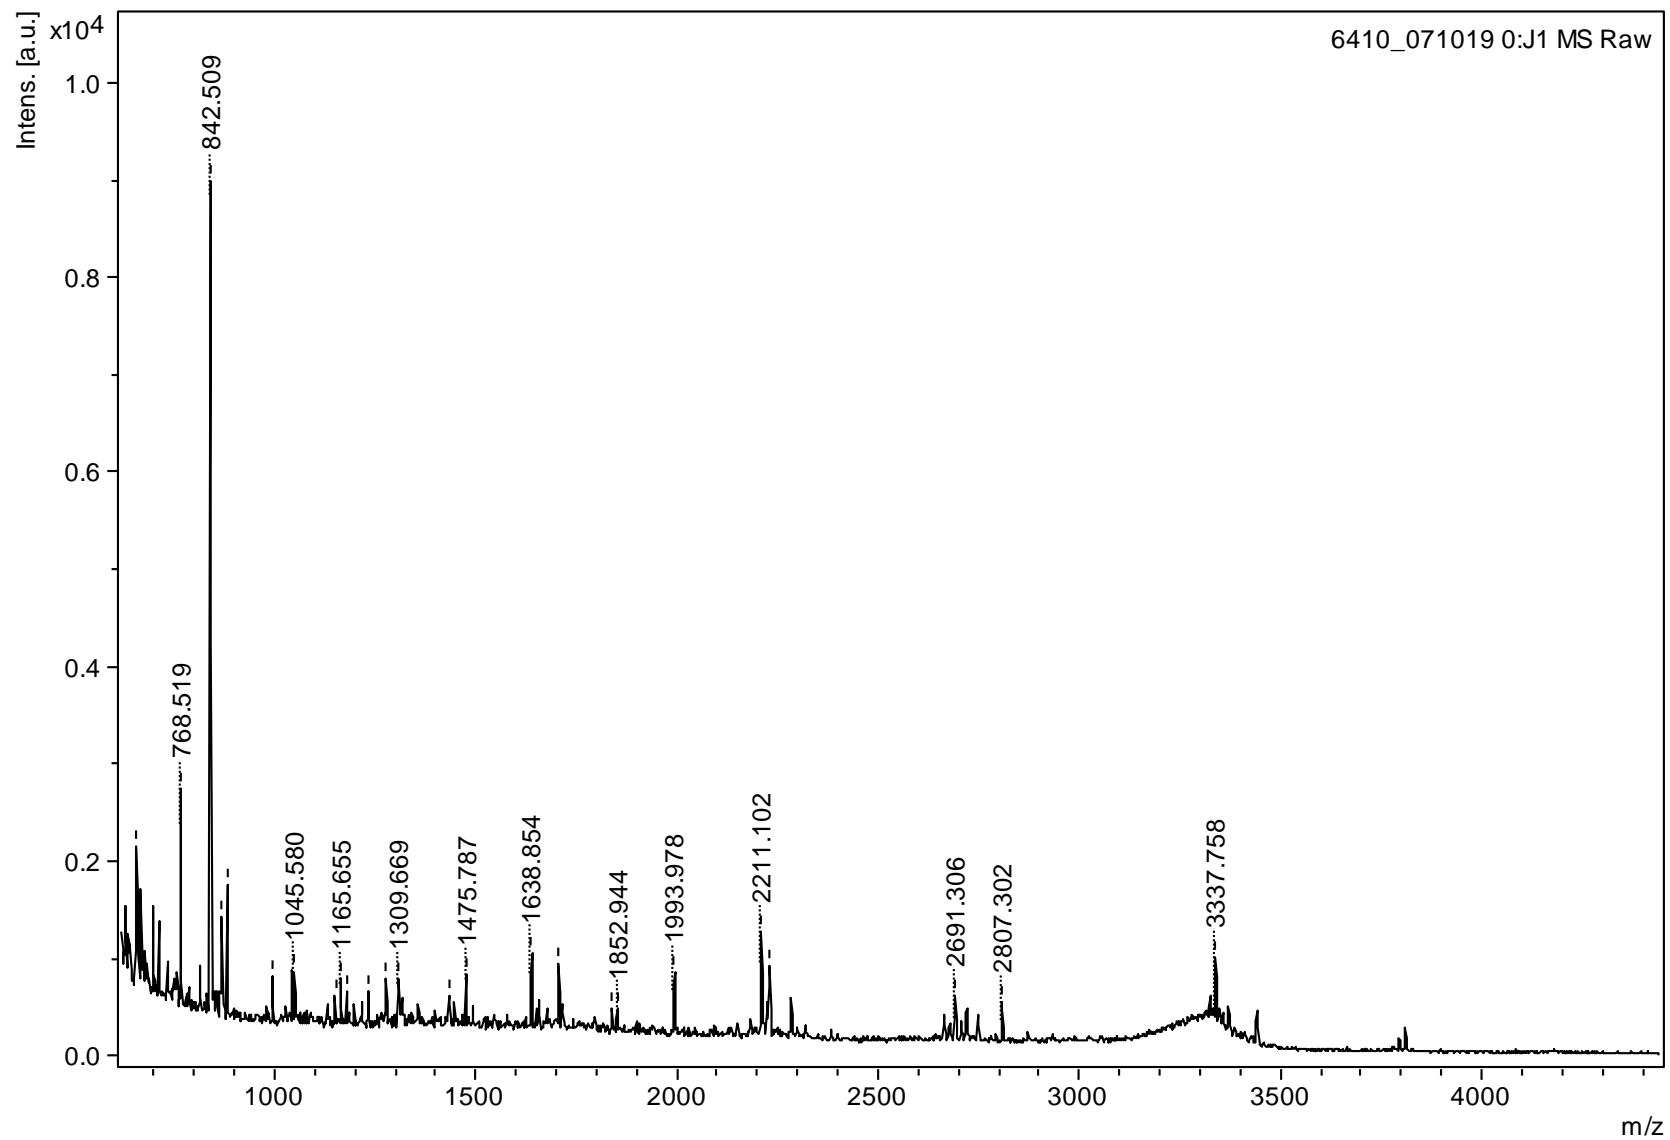

Supplemental figure 8e: Tissue specific transplantation antigen P35B, NP\_003304

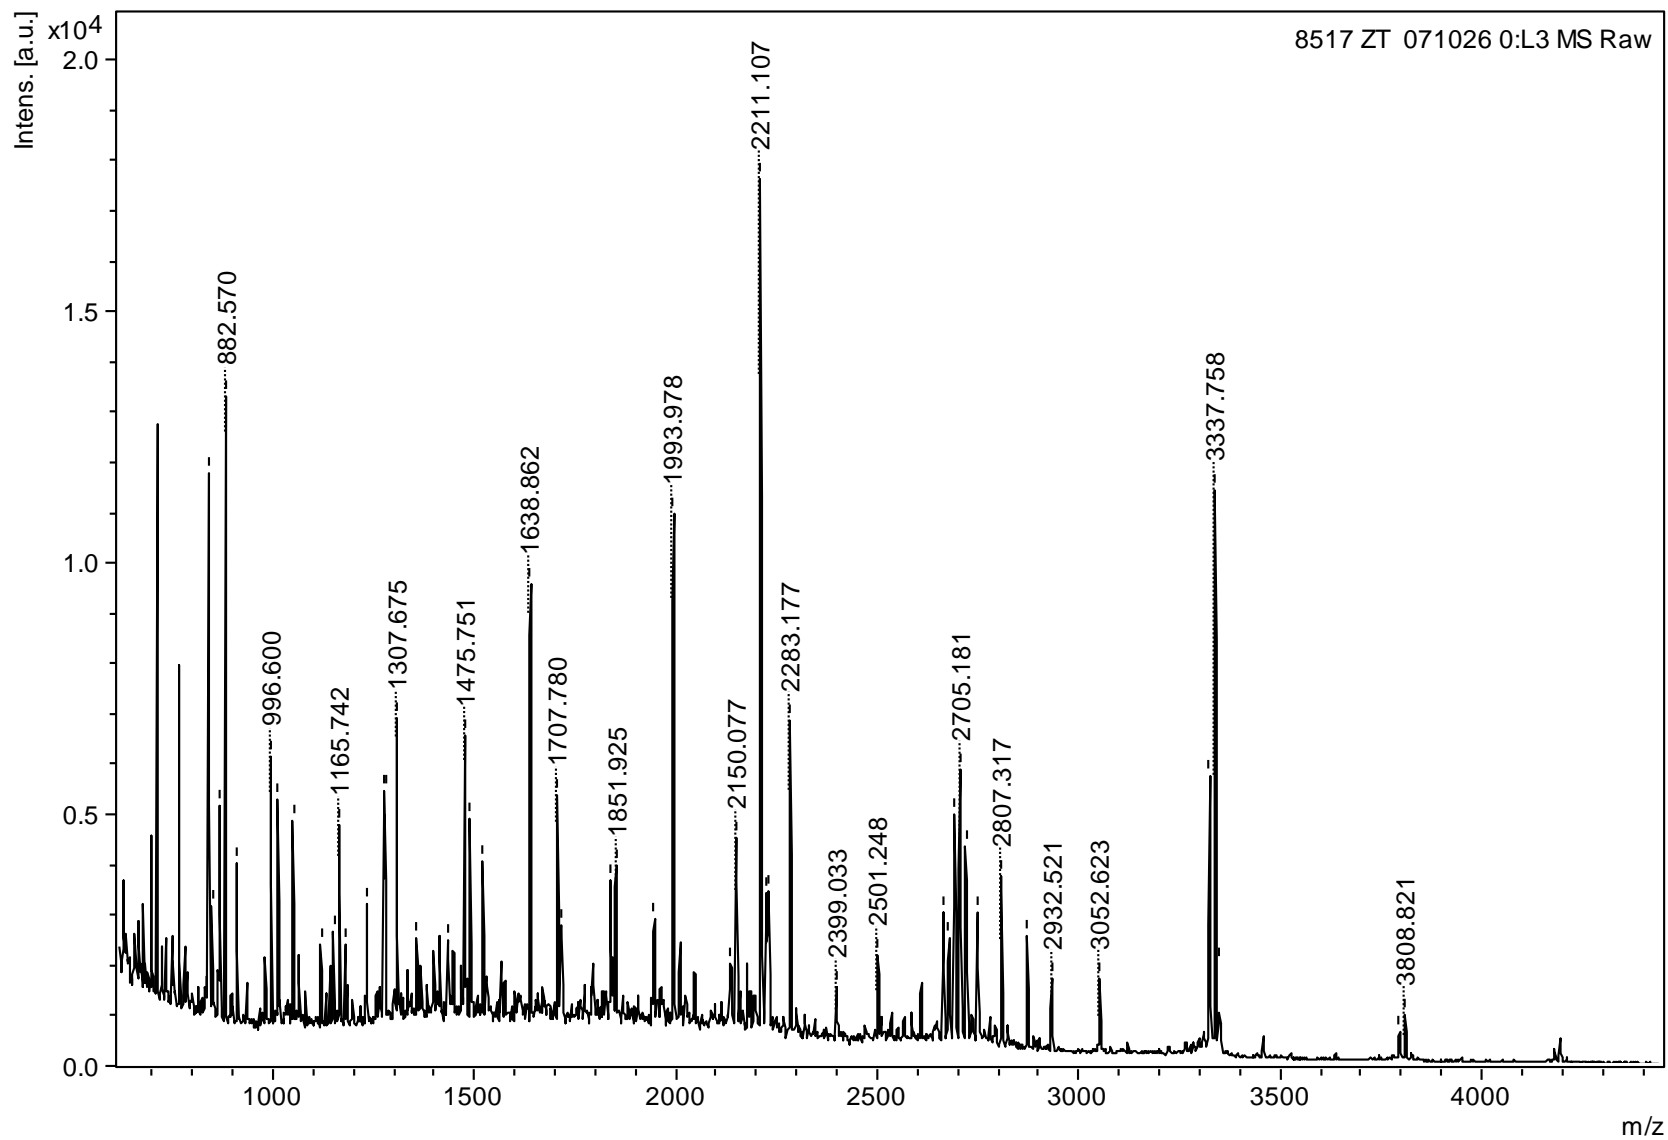

Supplemental figure 8f: Nucleophism 1, NP\_954654

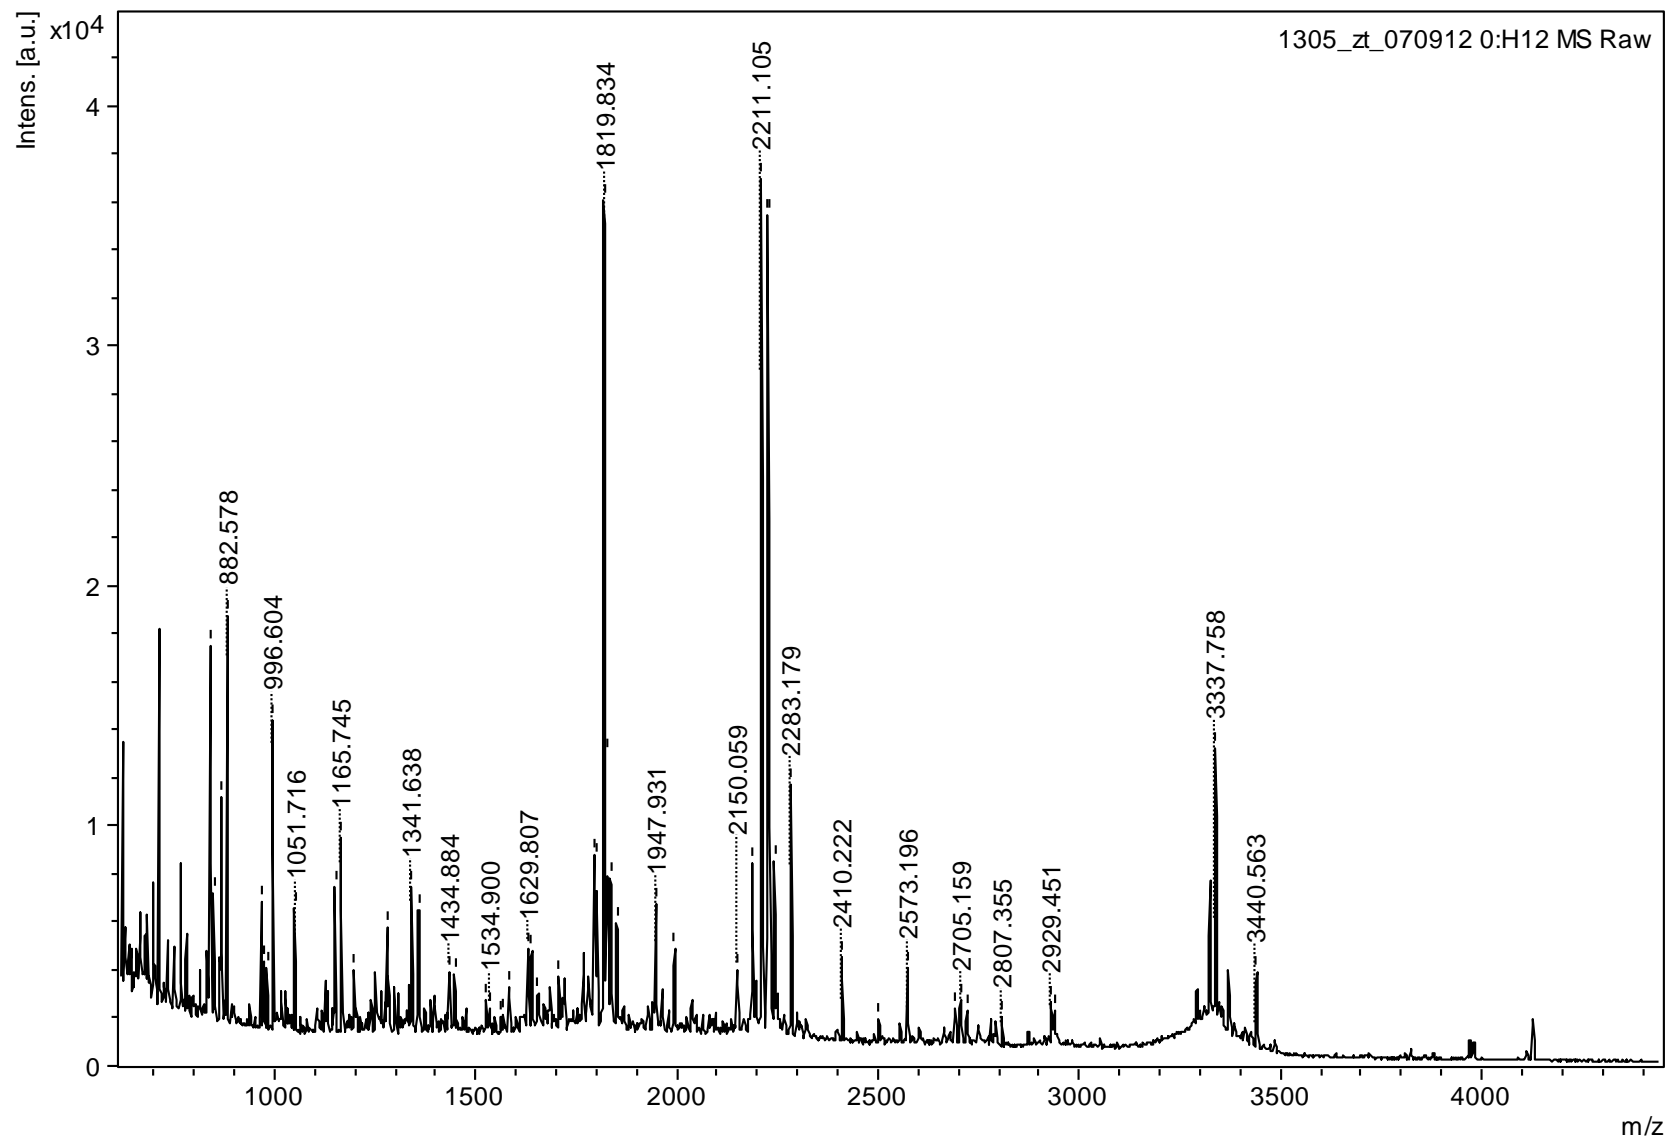

Supplemental figure 8g: Proteasome 26S subunit, NP\_002808

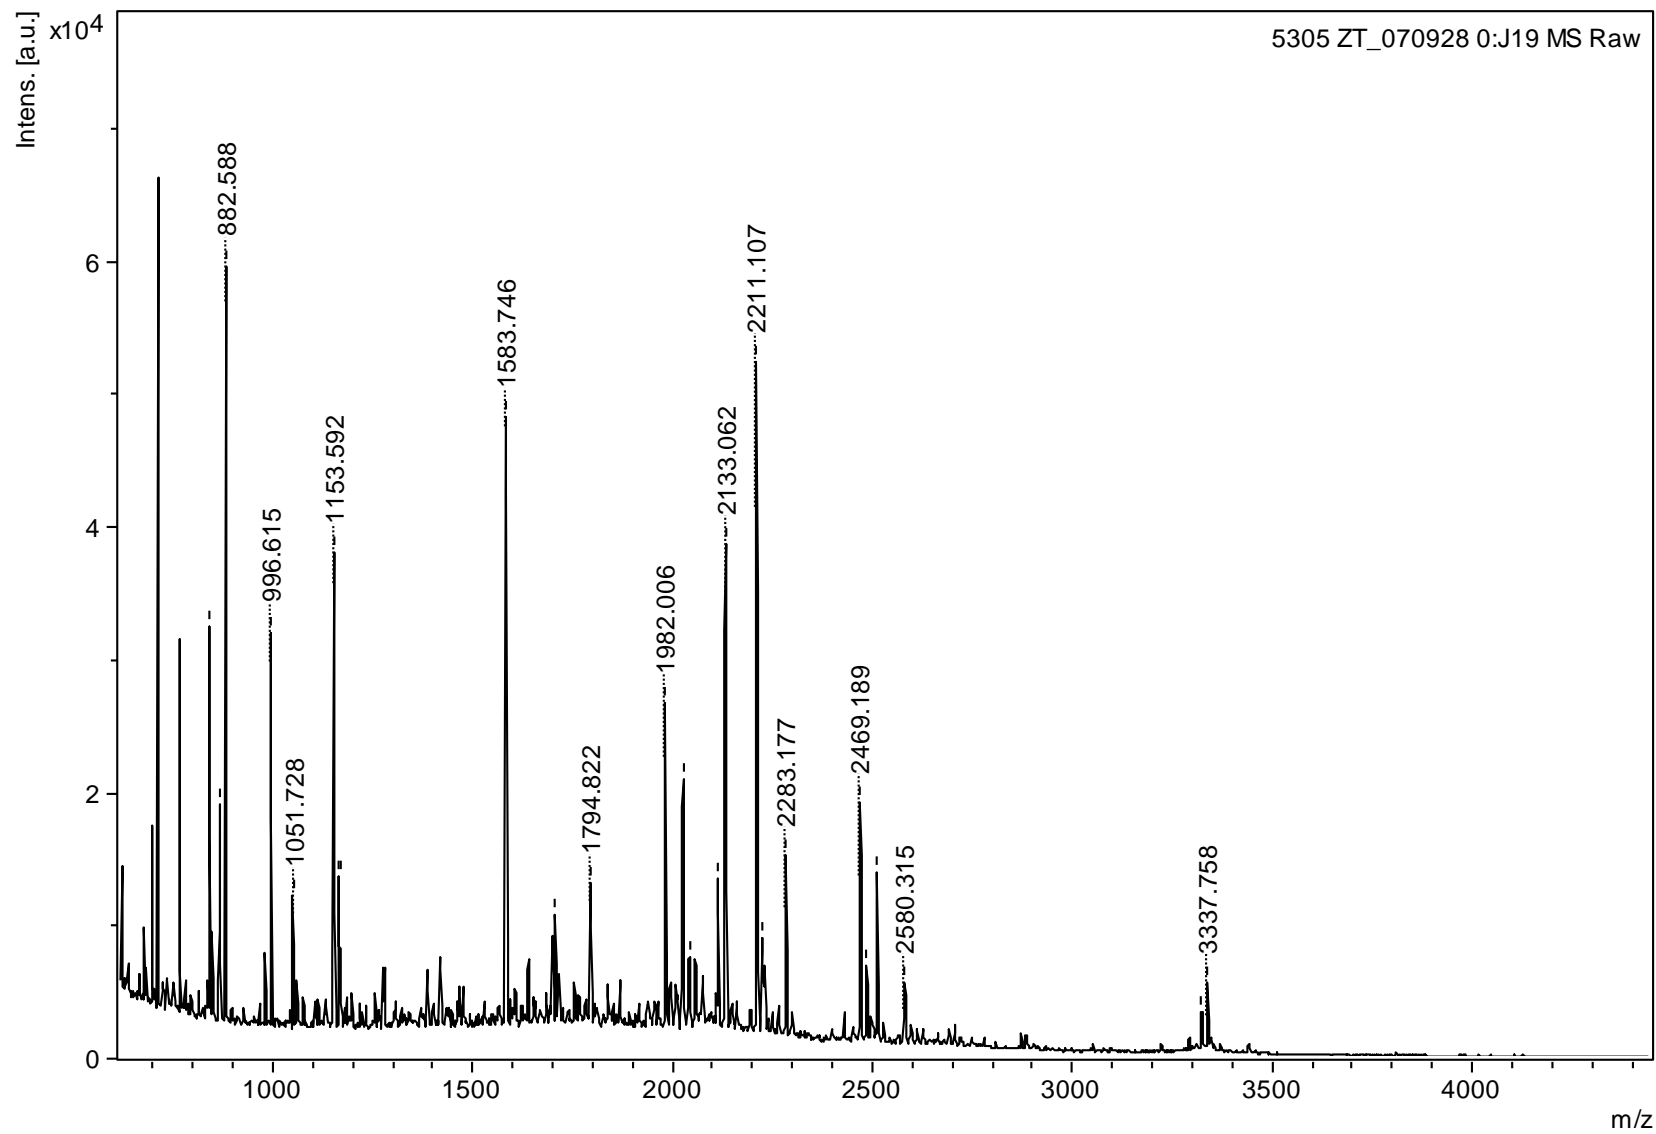

Supplemental figure 8h: Cytokeratin 8, NP\_002264

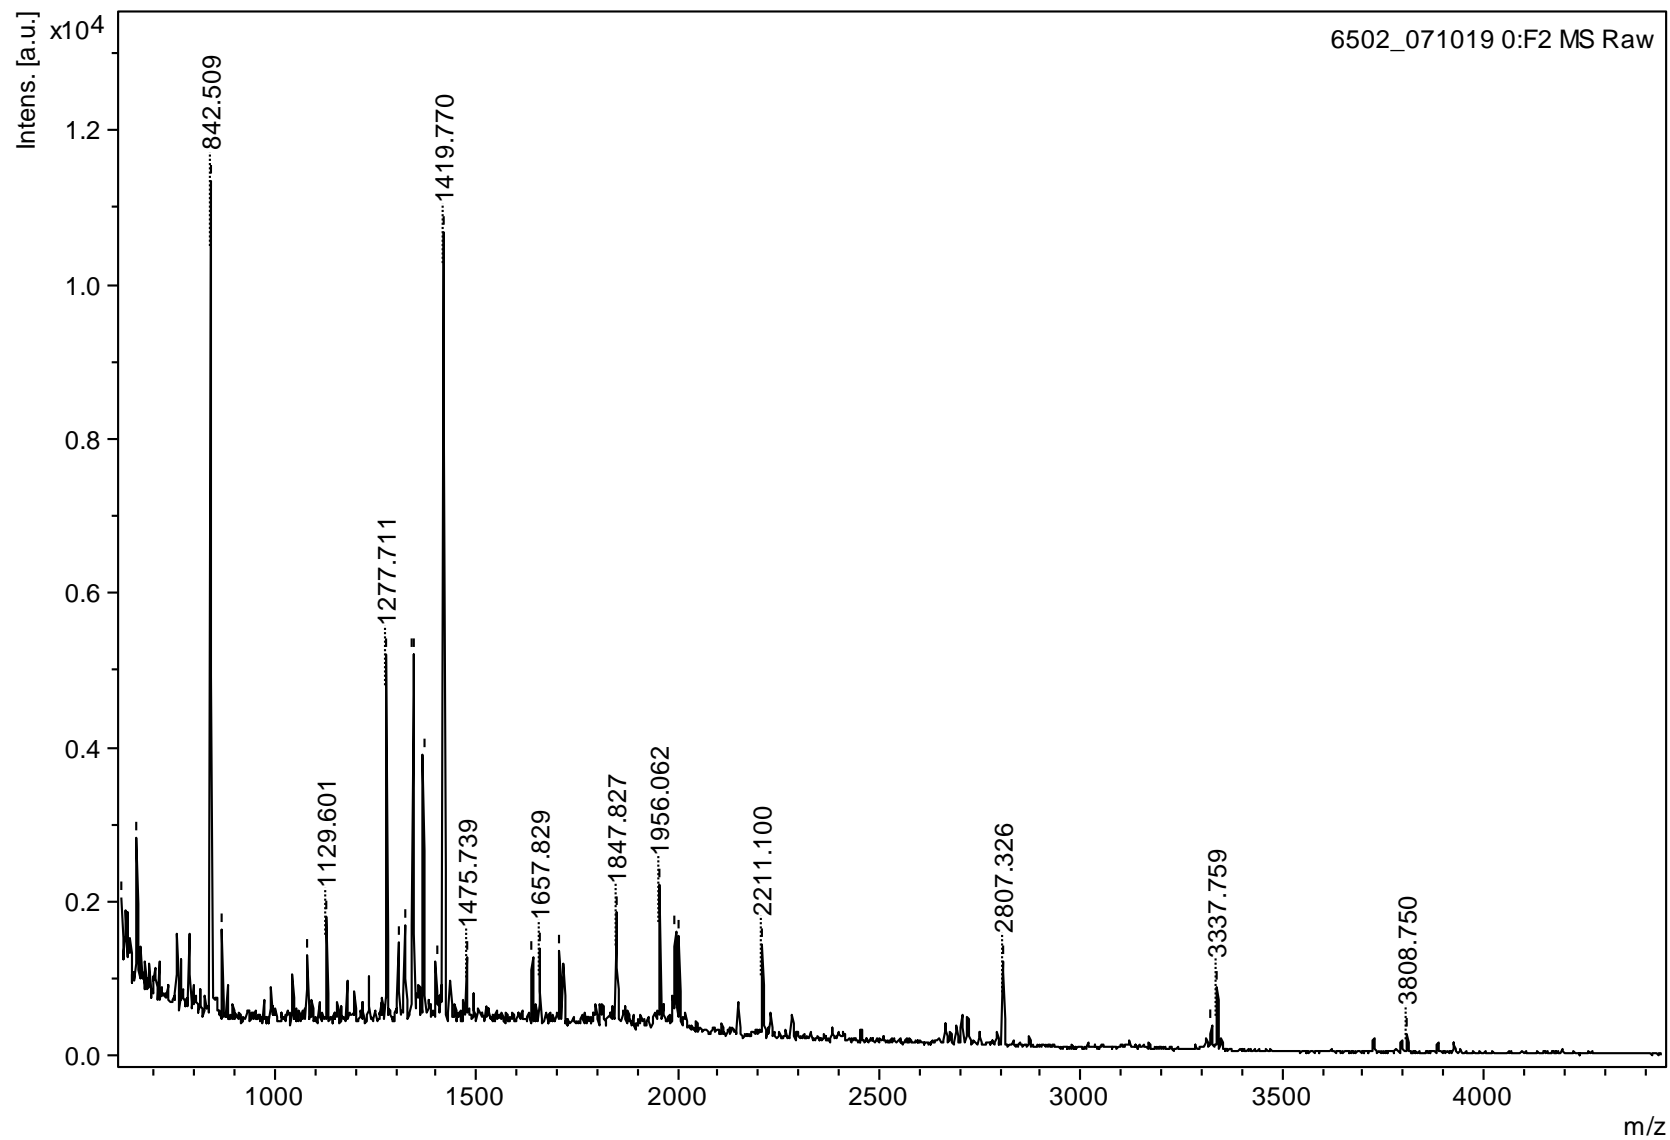

Supplemental figure 8i: Cytokeratin 9, CAA52924

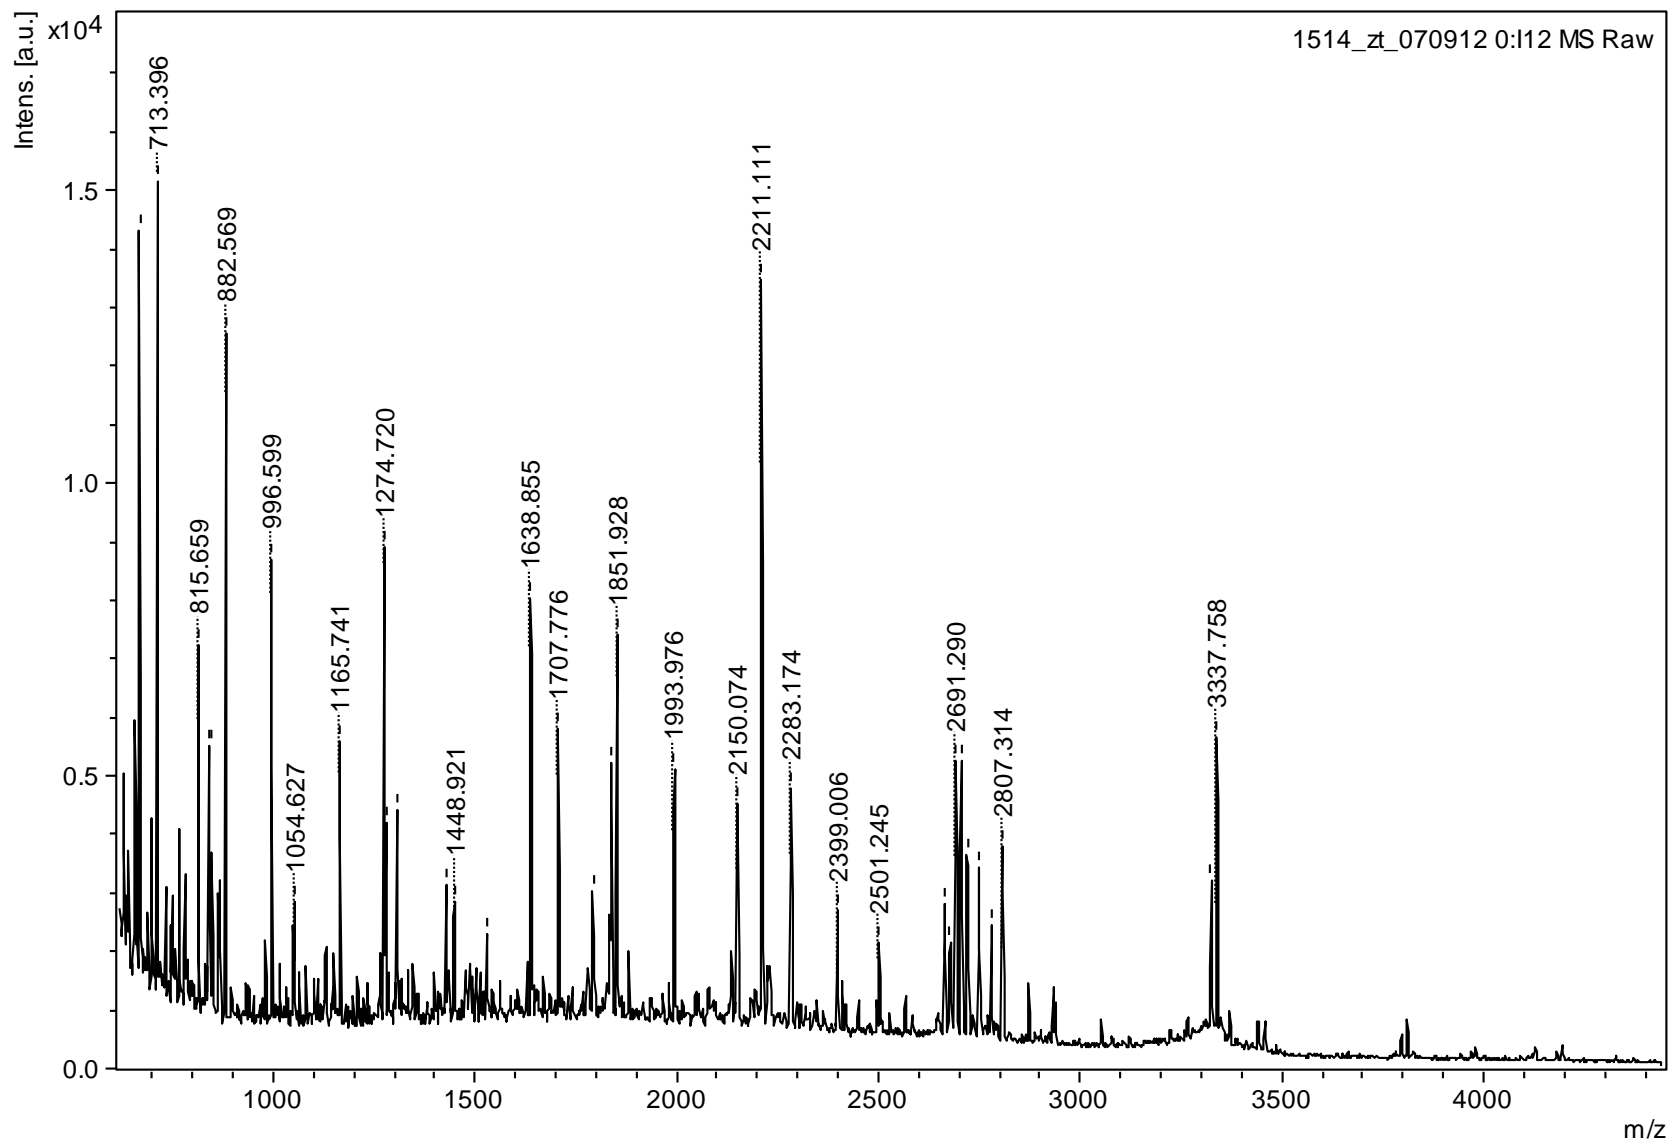

Supplemental figure 8j: Cytokeratin 18, CAA31377

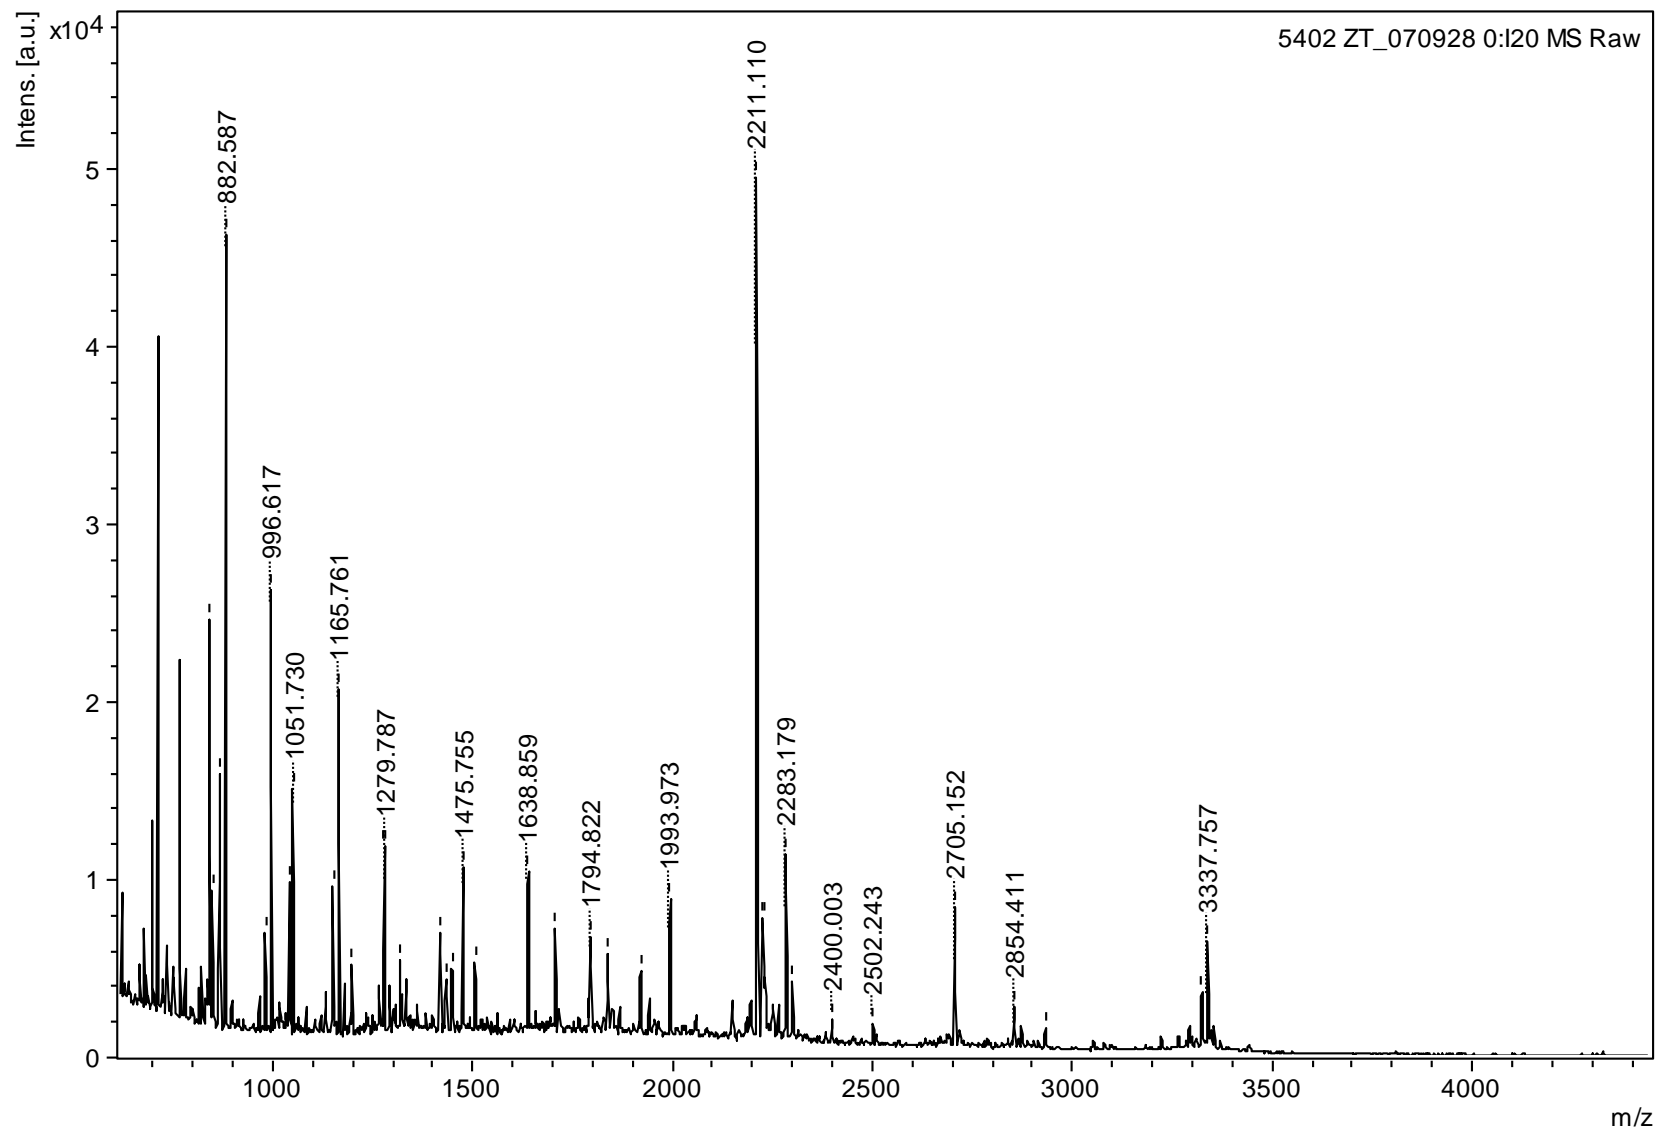



Supplemental figure 8k: Cytokeratin 19, NP\_002267

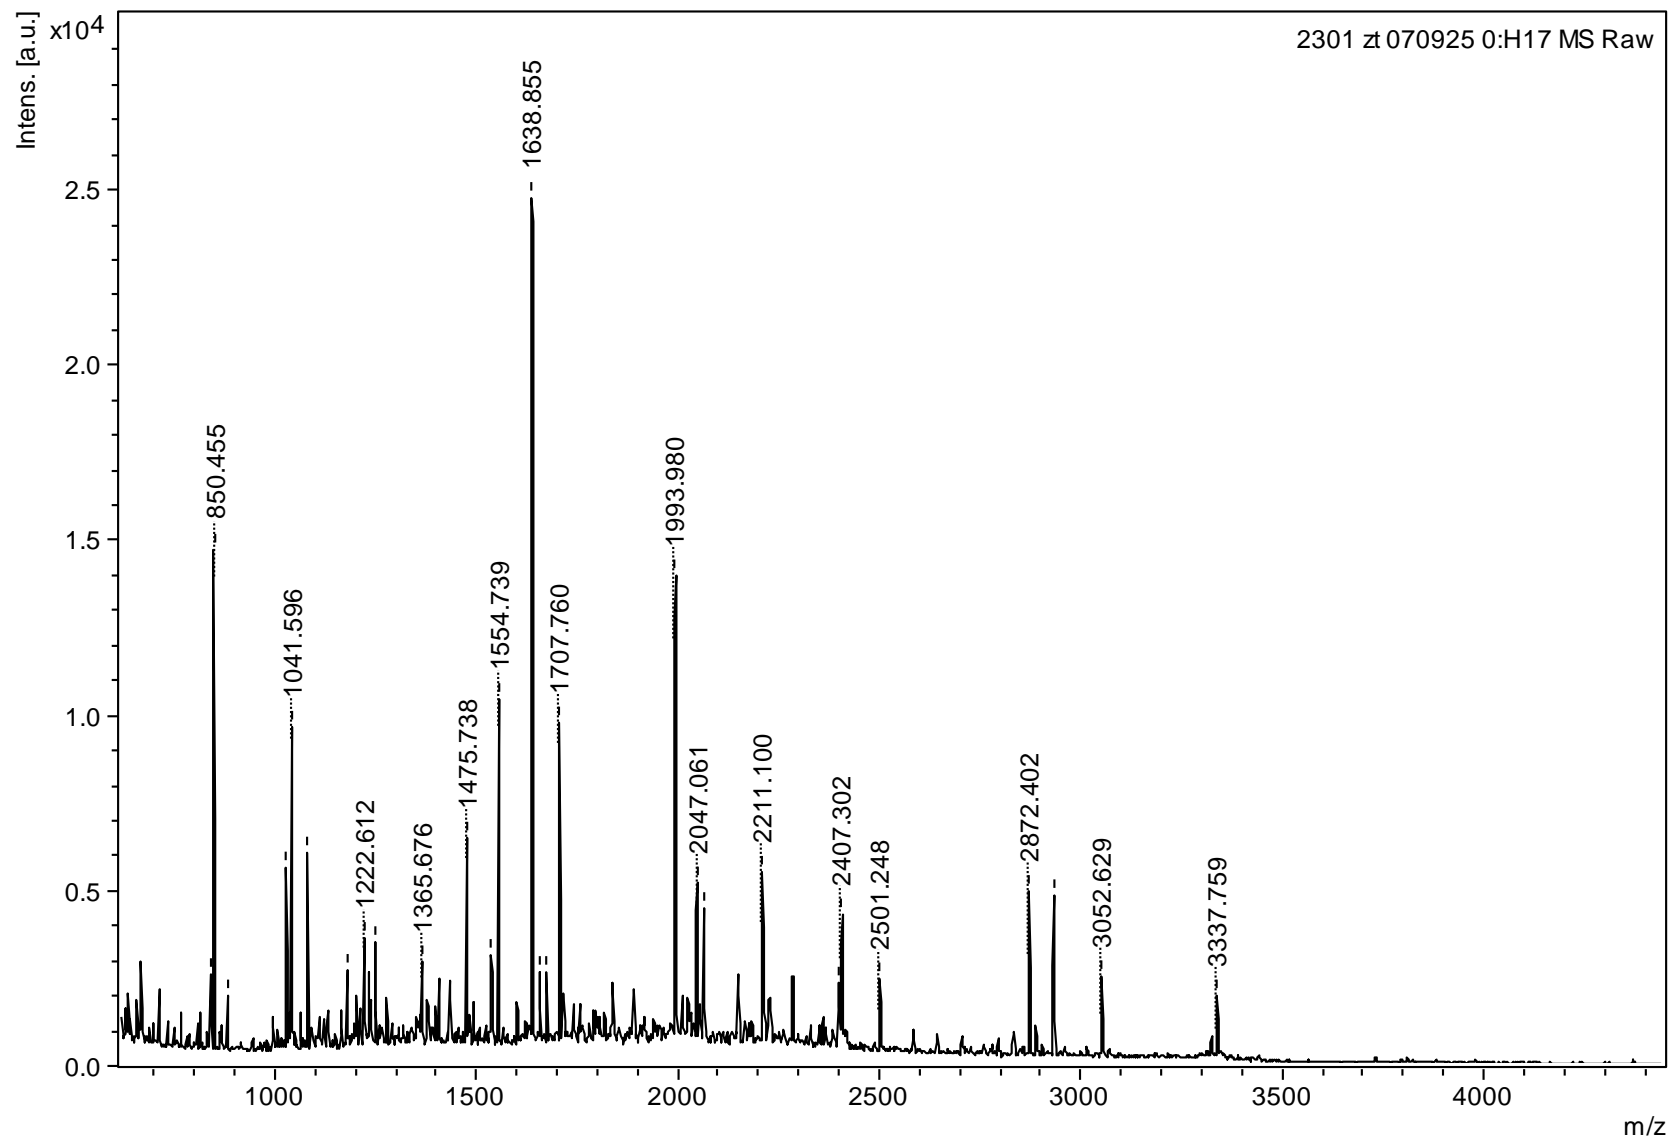

Supplemental figure 8I: Hemoglobin beta, NP\_000509

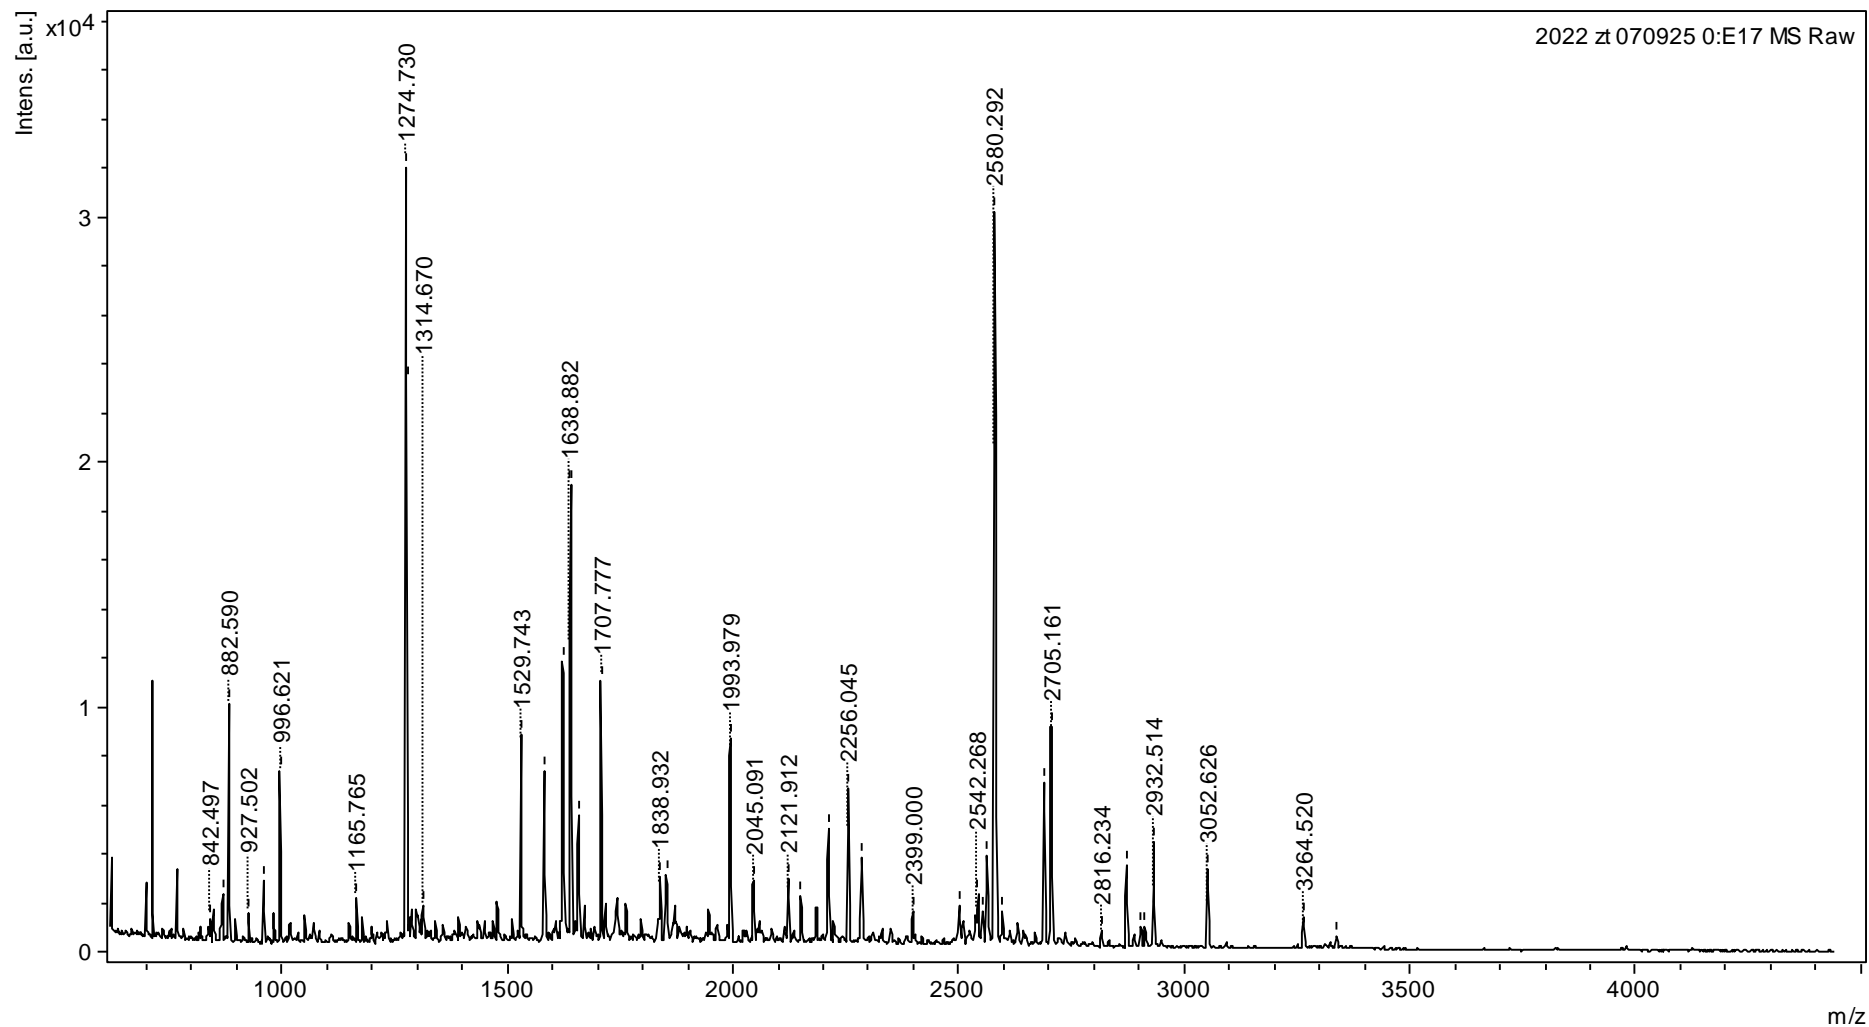

Supplemental figure 8m: Tripeptidyl peptidase I, AAQ72732

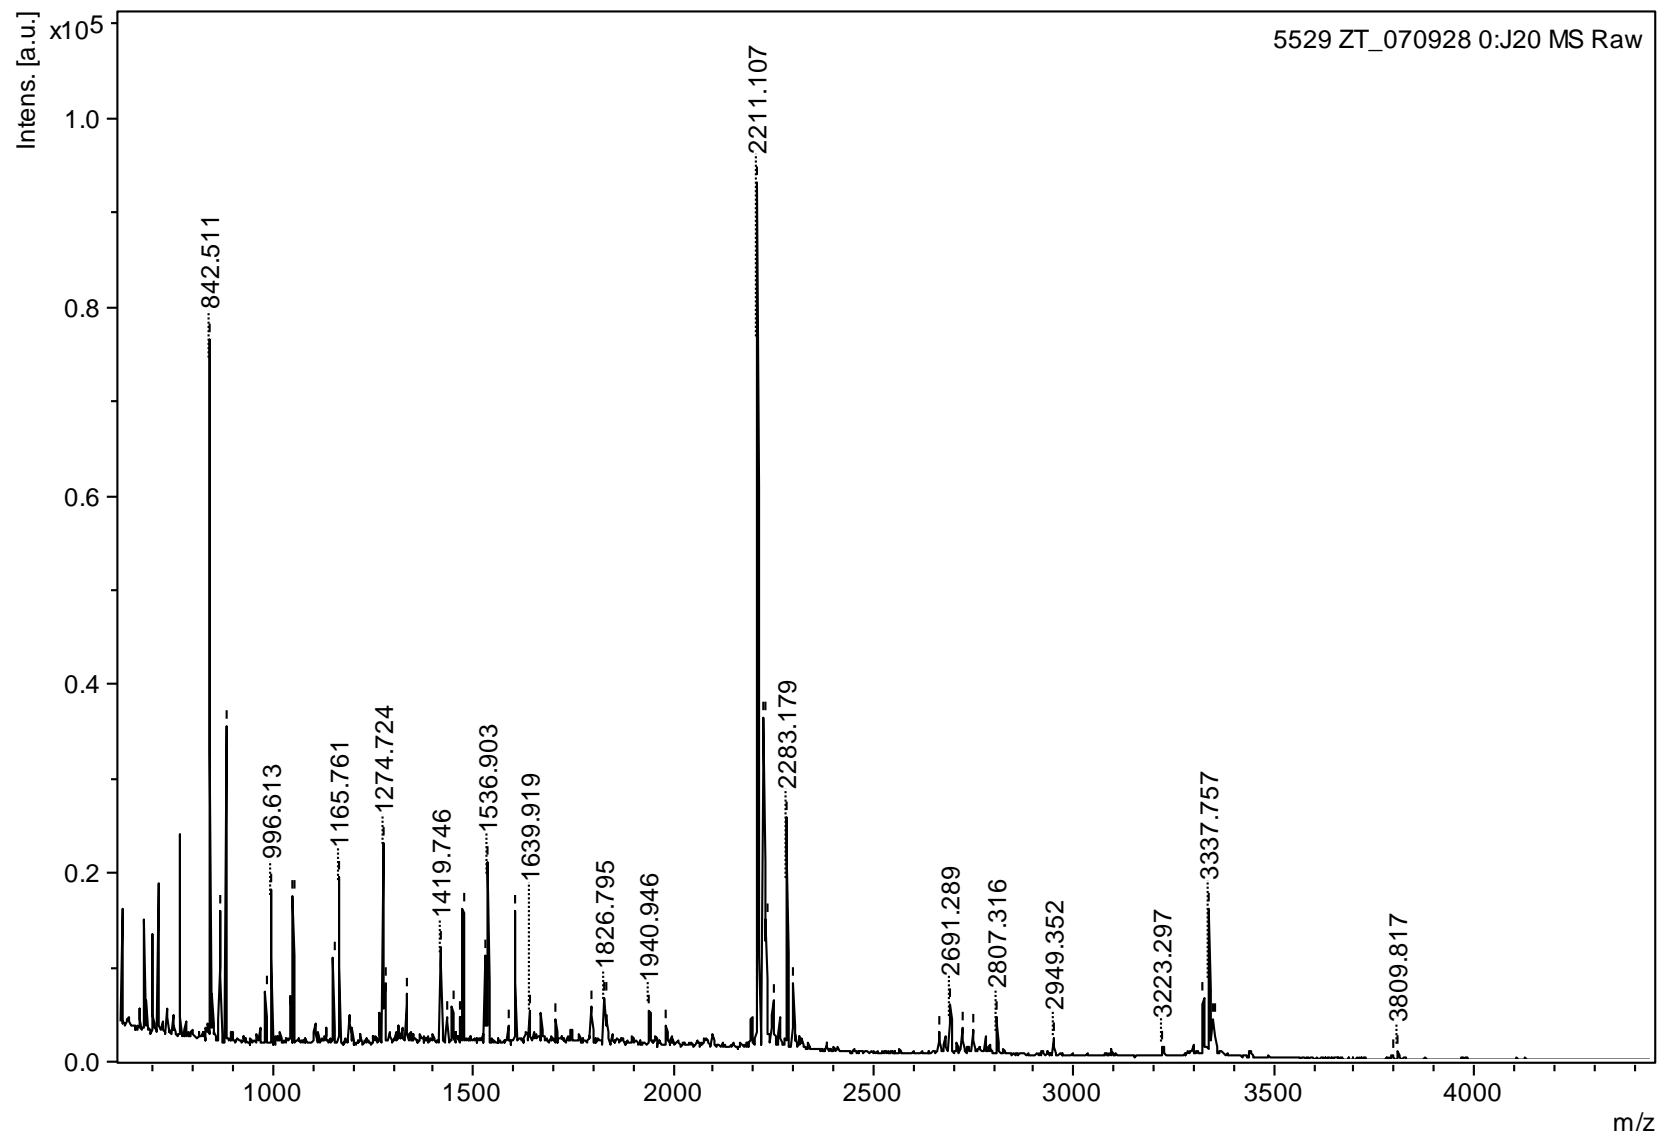

Supplemental figure 8n: Decapping enzyme scavenger, AAH14532 &amp; Upstream binding protein 1, NP\_055332

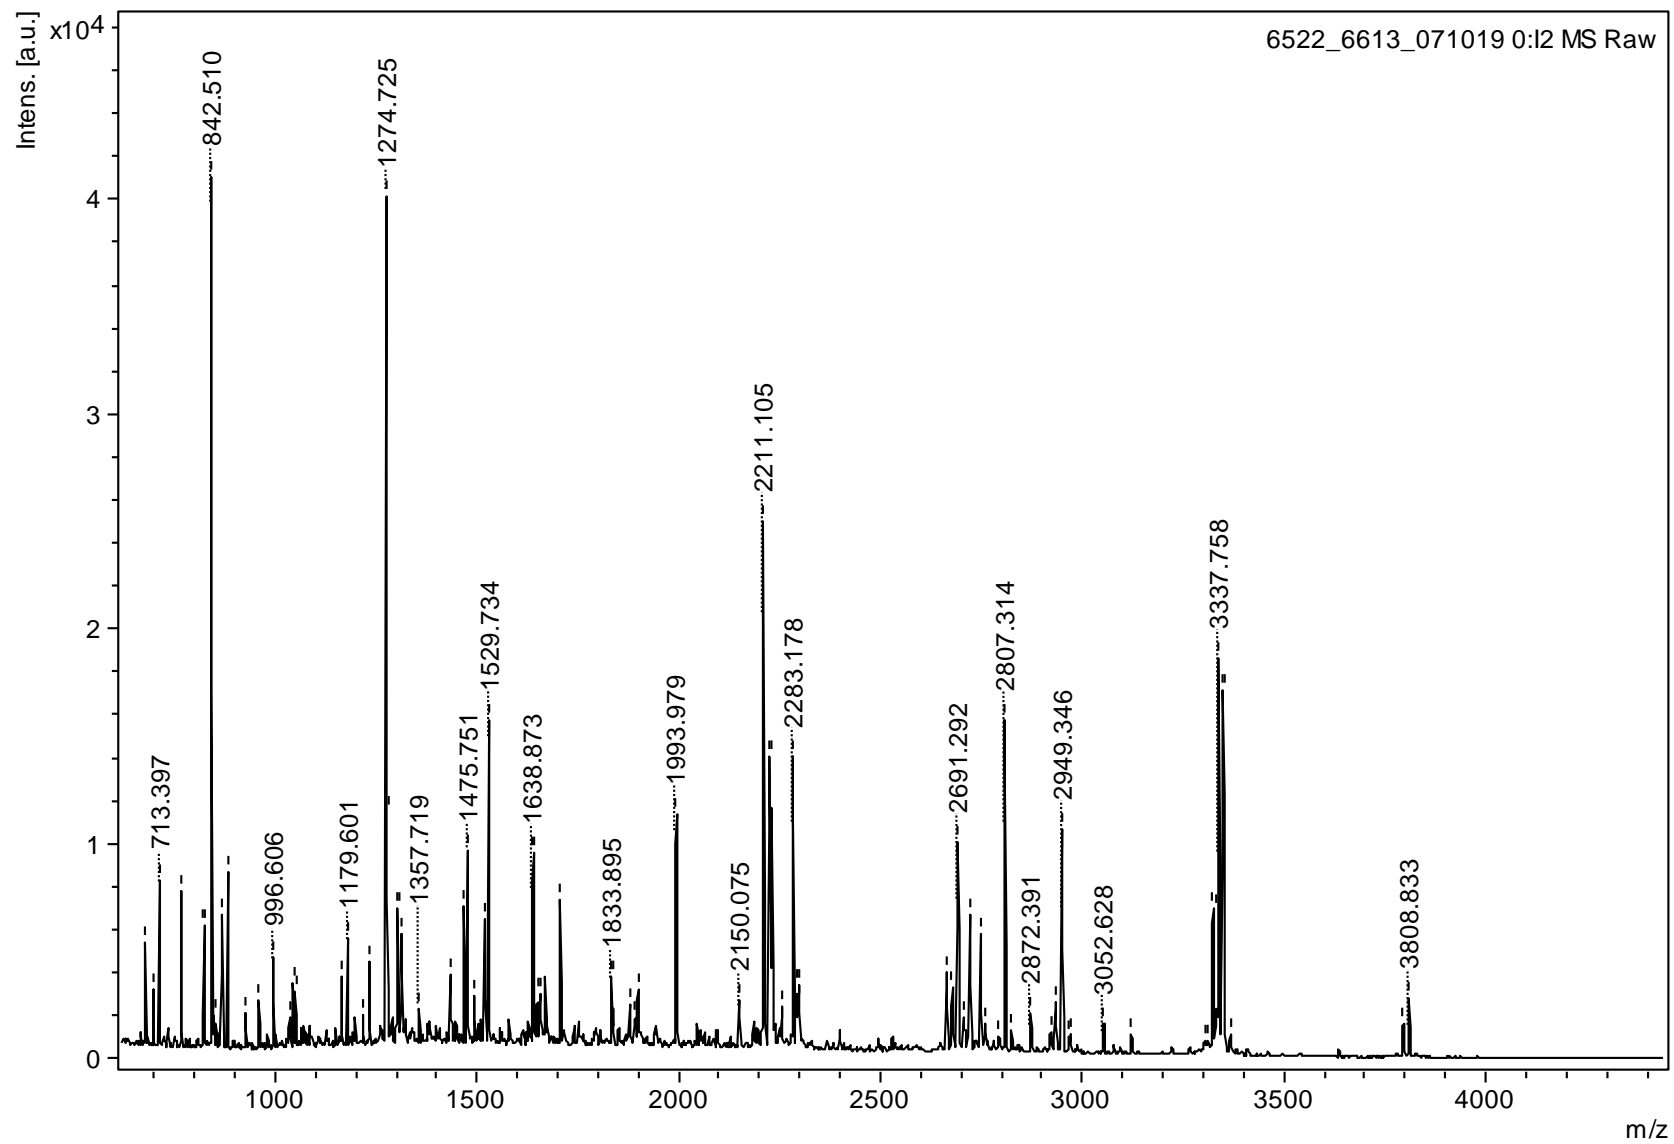

Supplemental figure 8o: Seryl-tRNA-synthetase, AAH09390

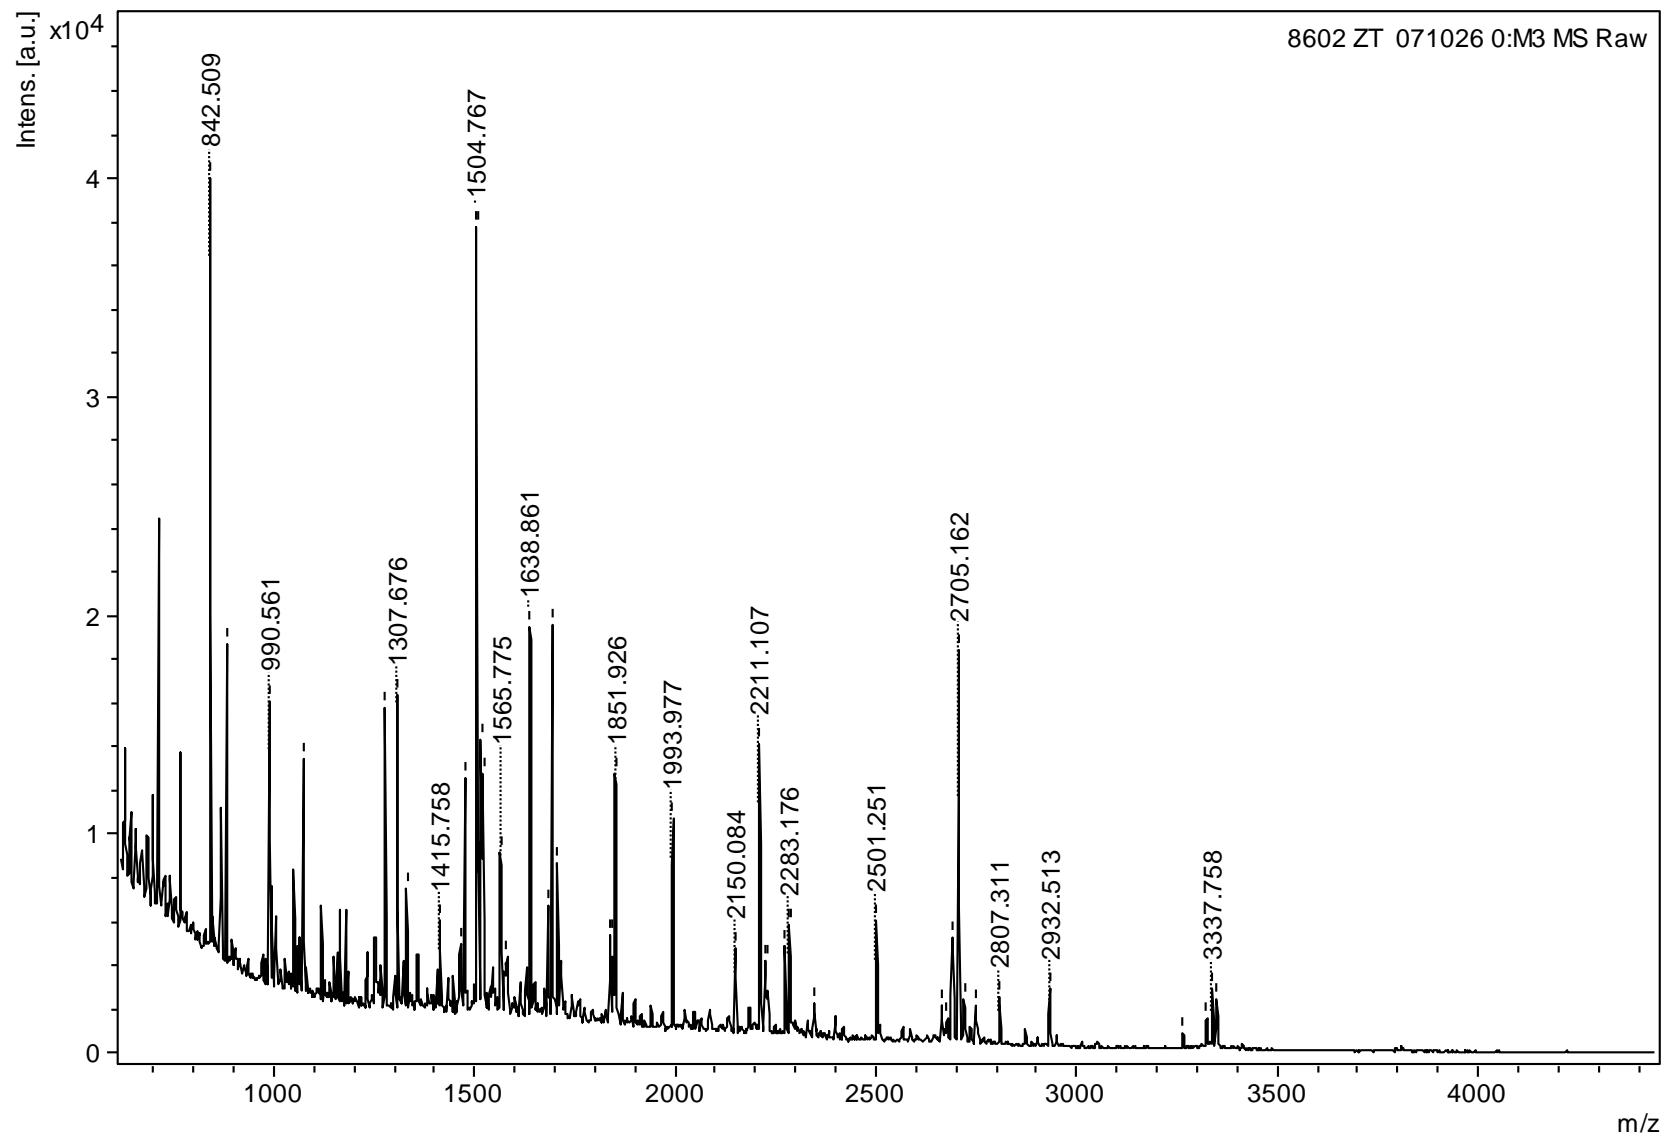

Supplemental figure 8p: Eukaryotic translation initiation factor 4A isoform 1, NP\_001407

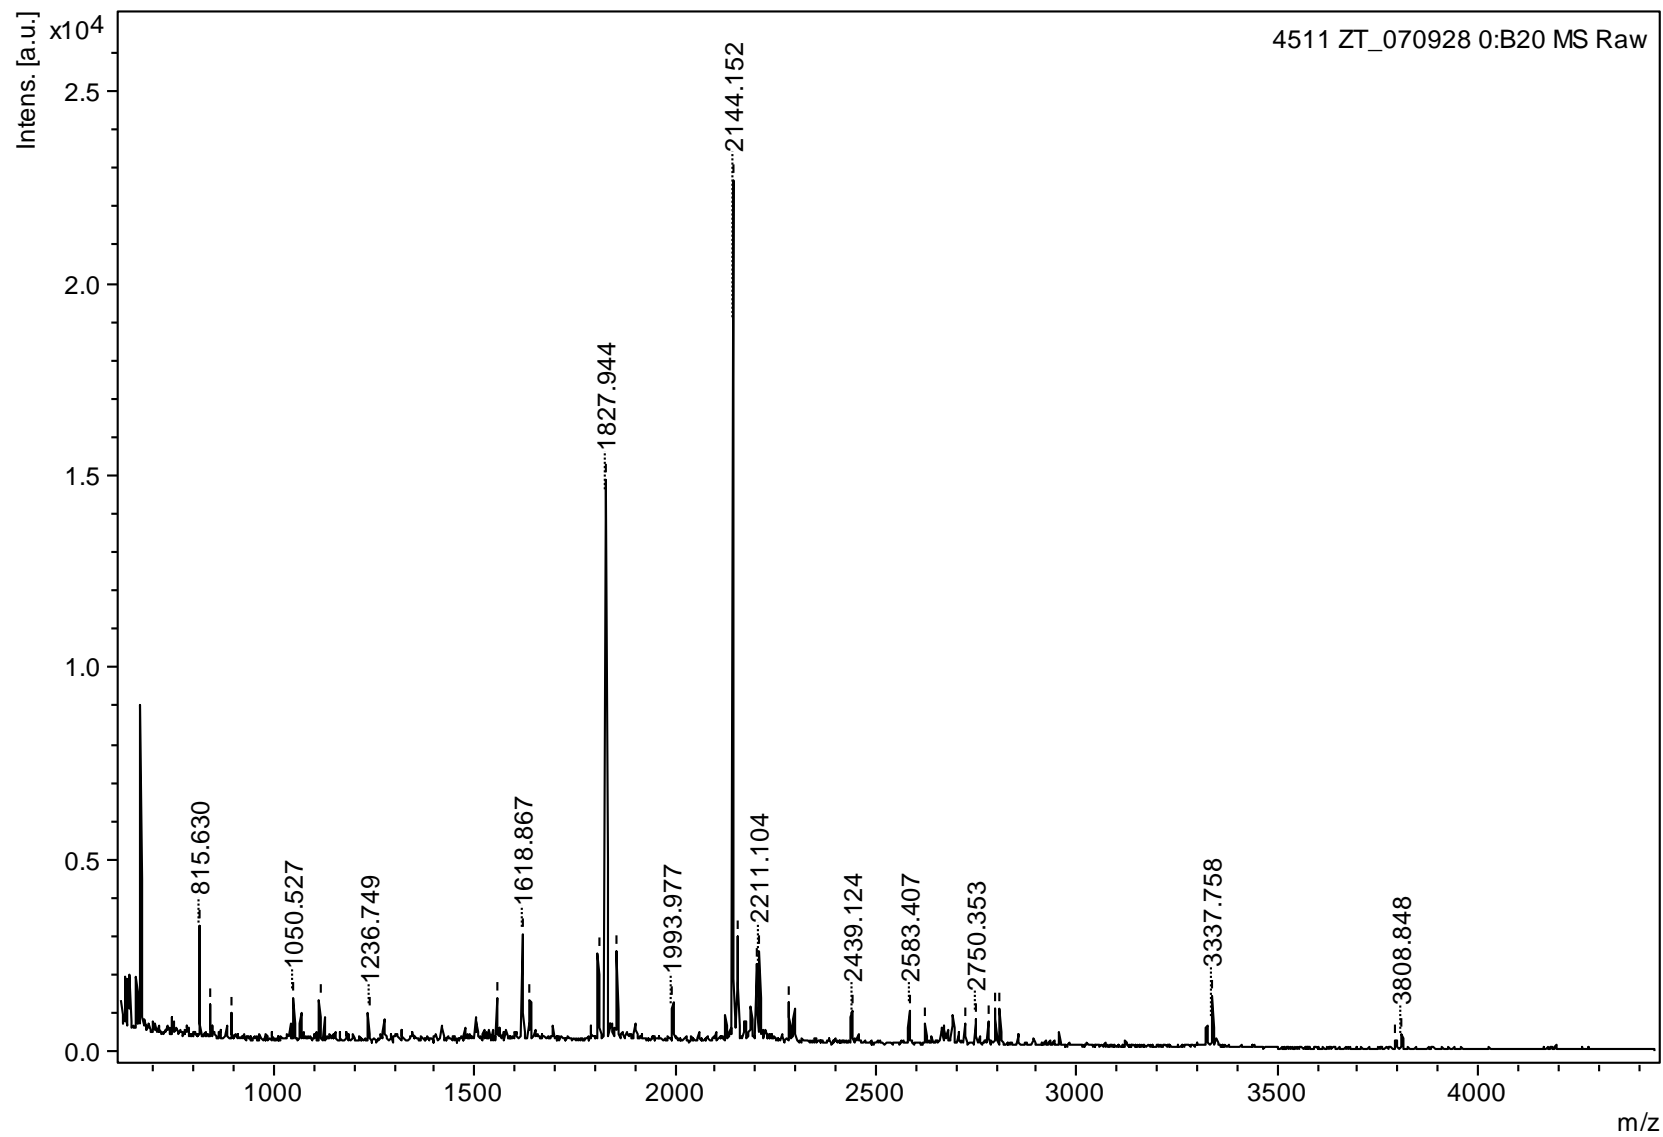

Supplemental figure 8q: GNAS complex locus, NP\_536351

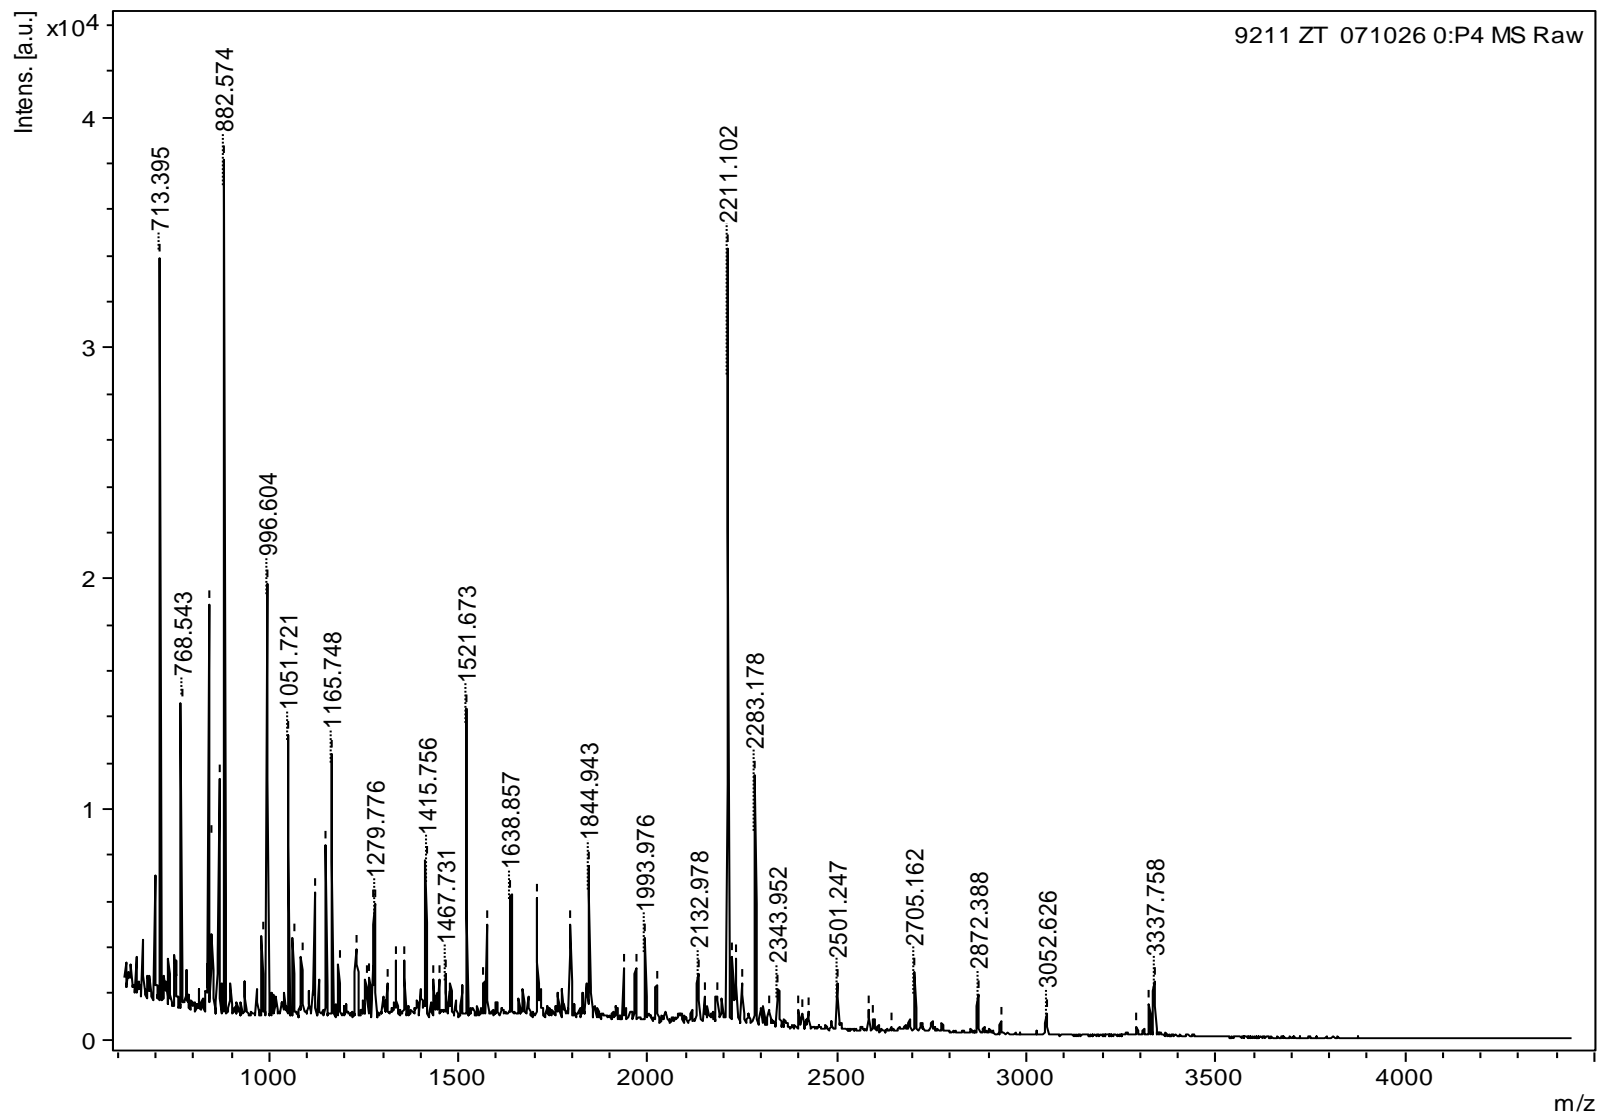

## Supplemental figure 8r: HSP70 protein 8, NP\_006588

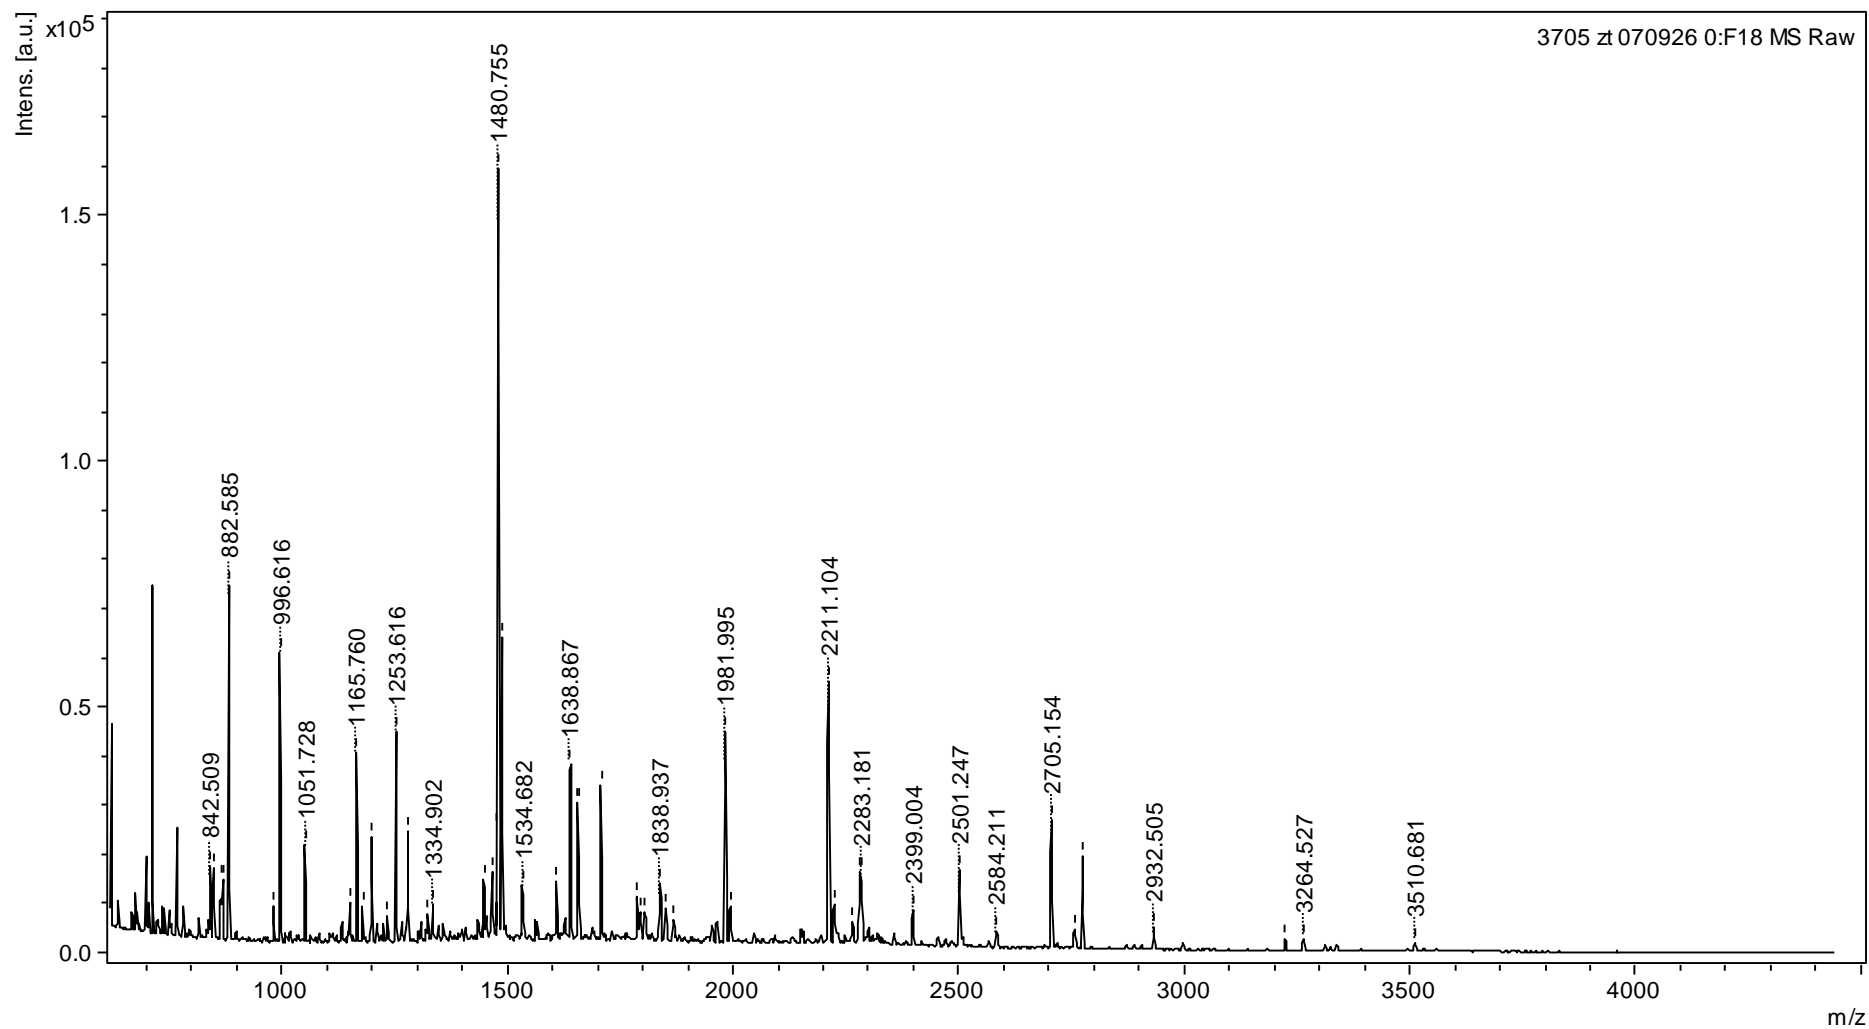



Supplemental figure 8s: Histone deacetylase, NP\_001518

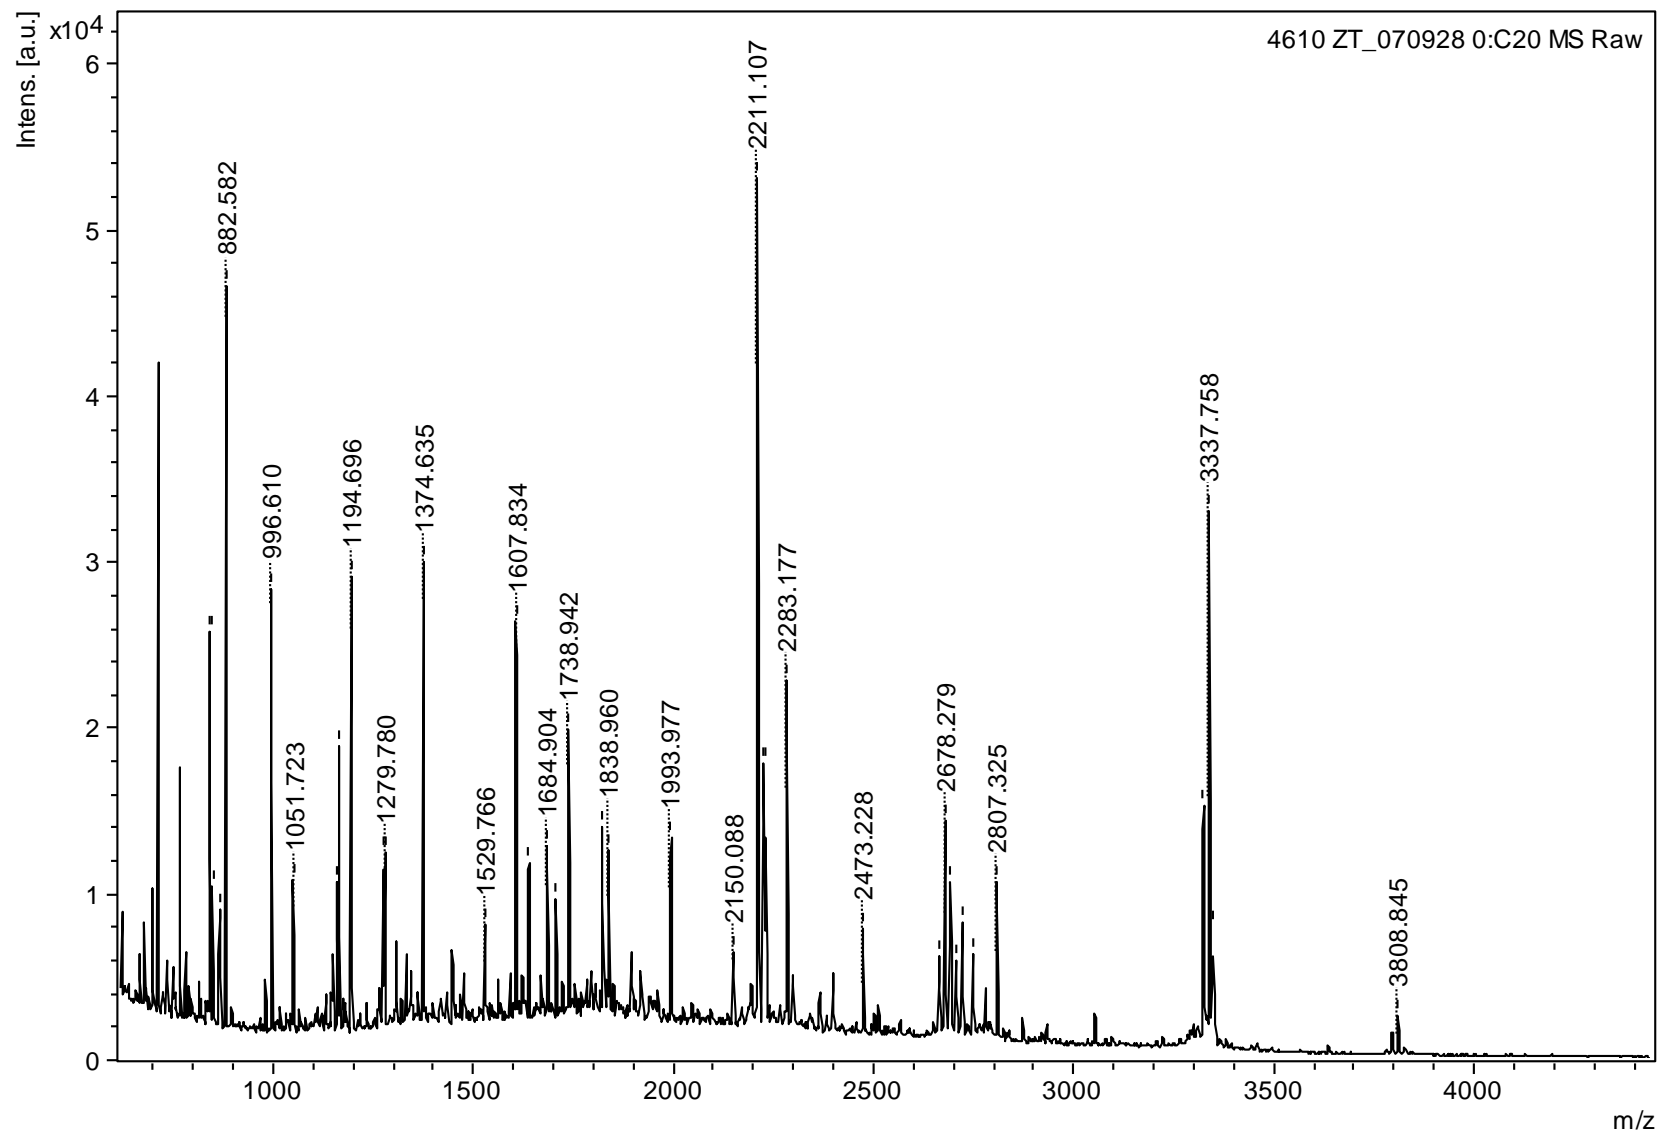

Supplemental figure 8t: Protein disulfide isomerise family A member 3, BAA11928

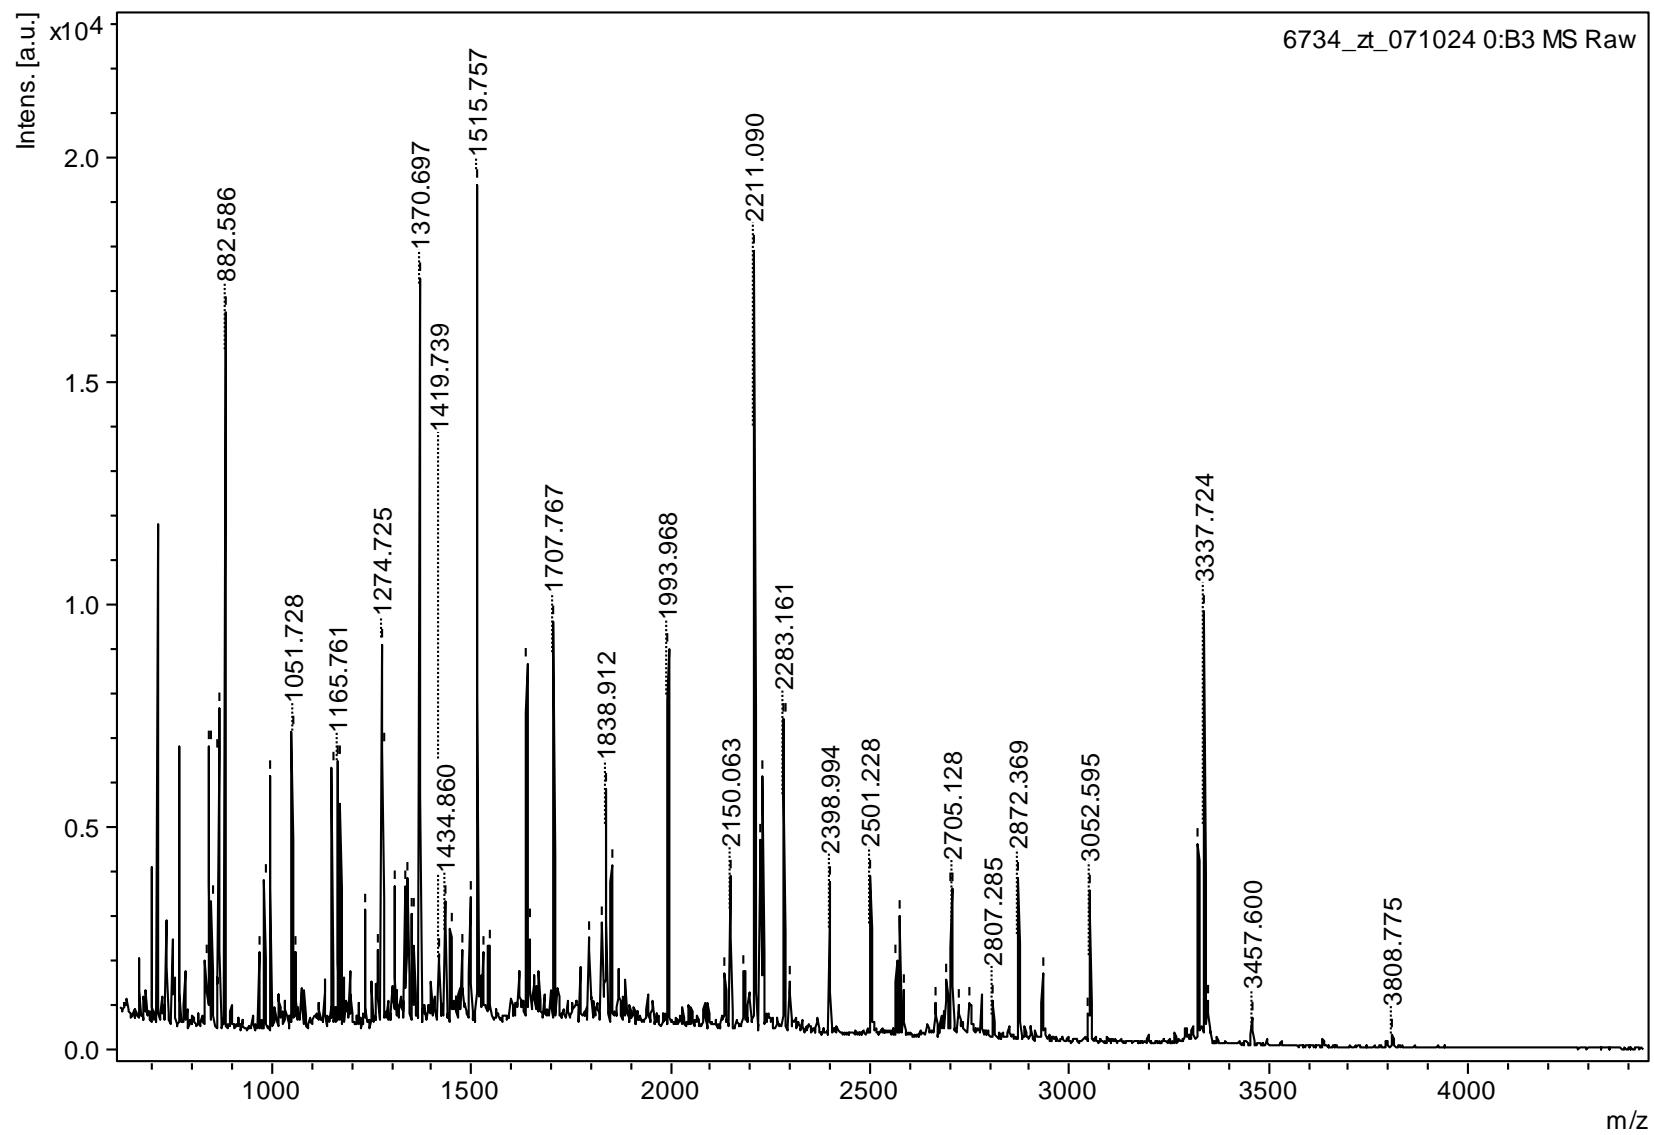

Supplemental figure 8u: Peroxiredoxin 2, NP\_005800

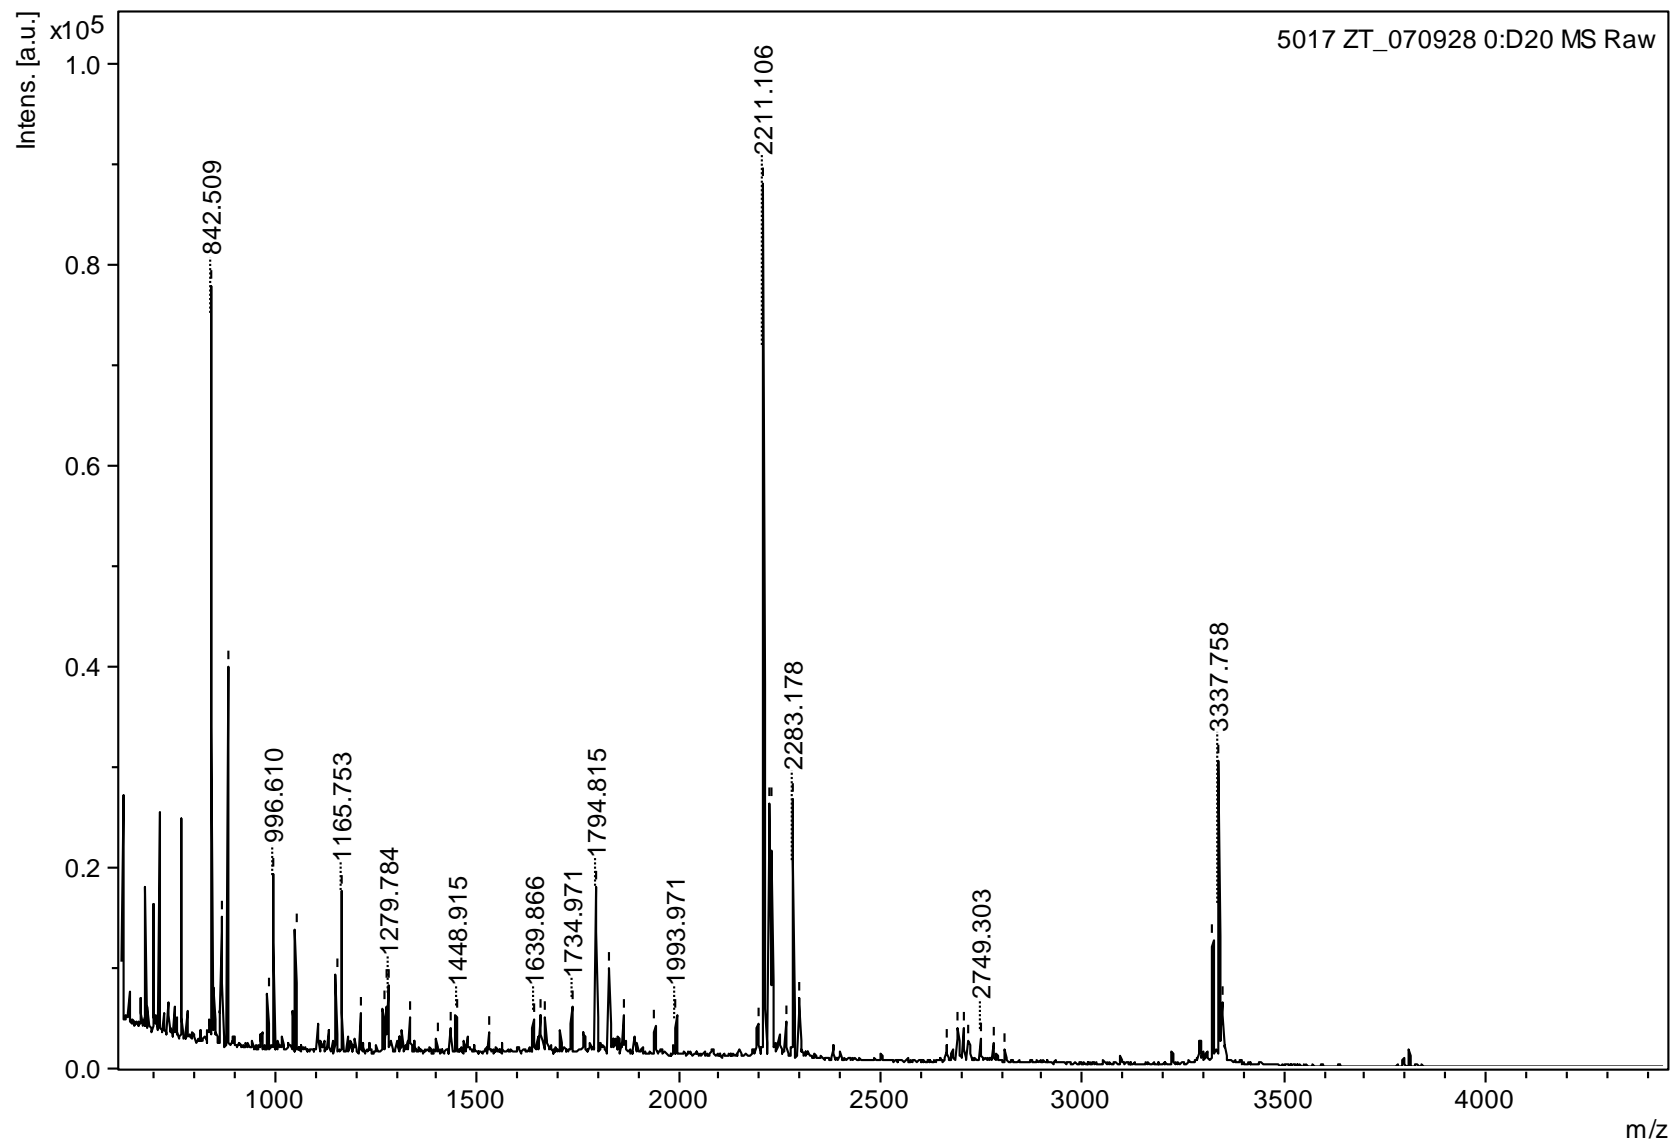

Supplemental figure 8v: HSP70 protein 9, NP\_004125

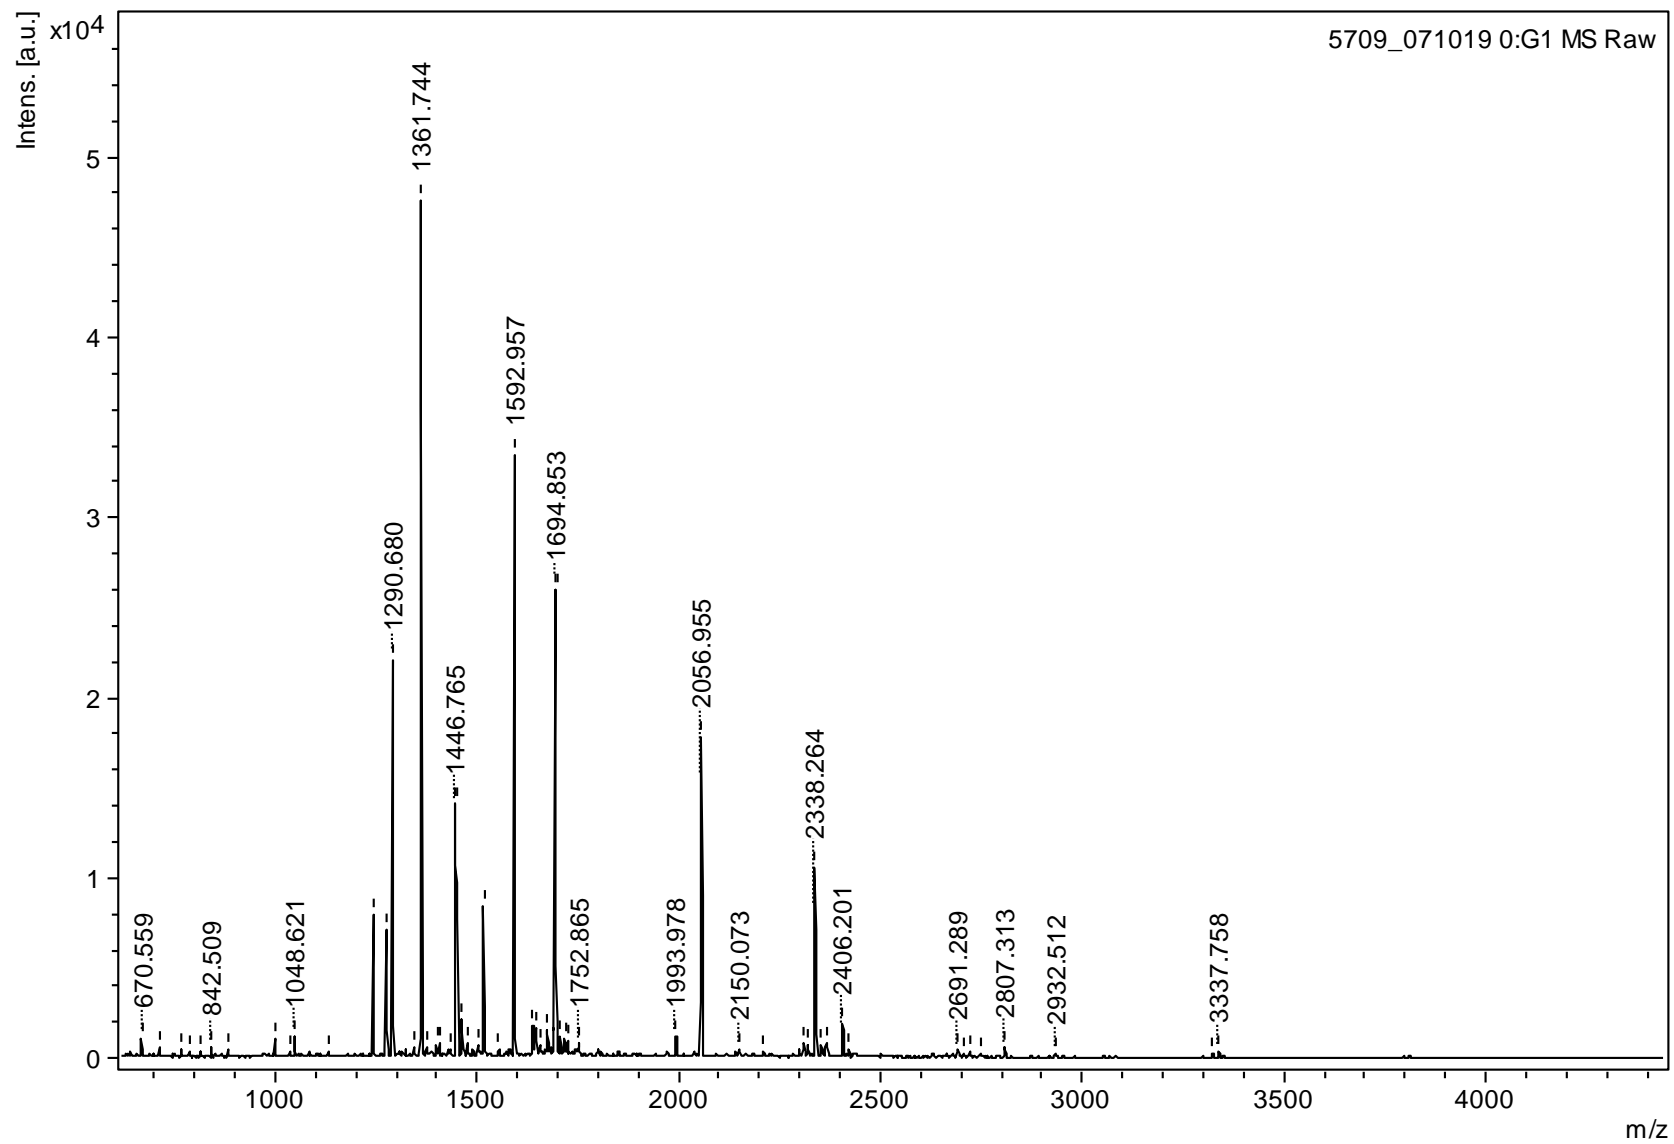

Supplemental figure 8w: Tubulin alpha, NP\_006073

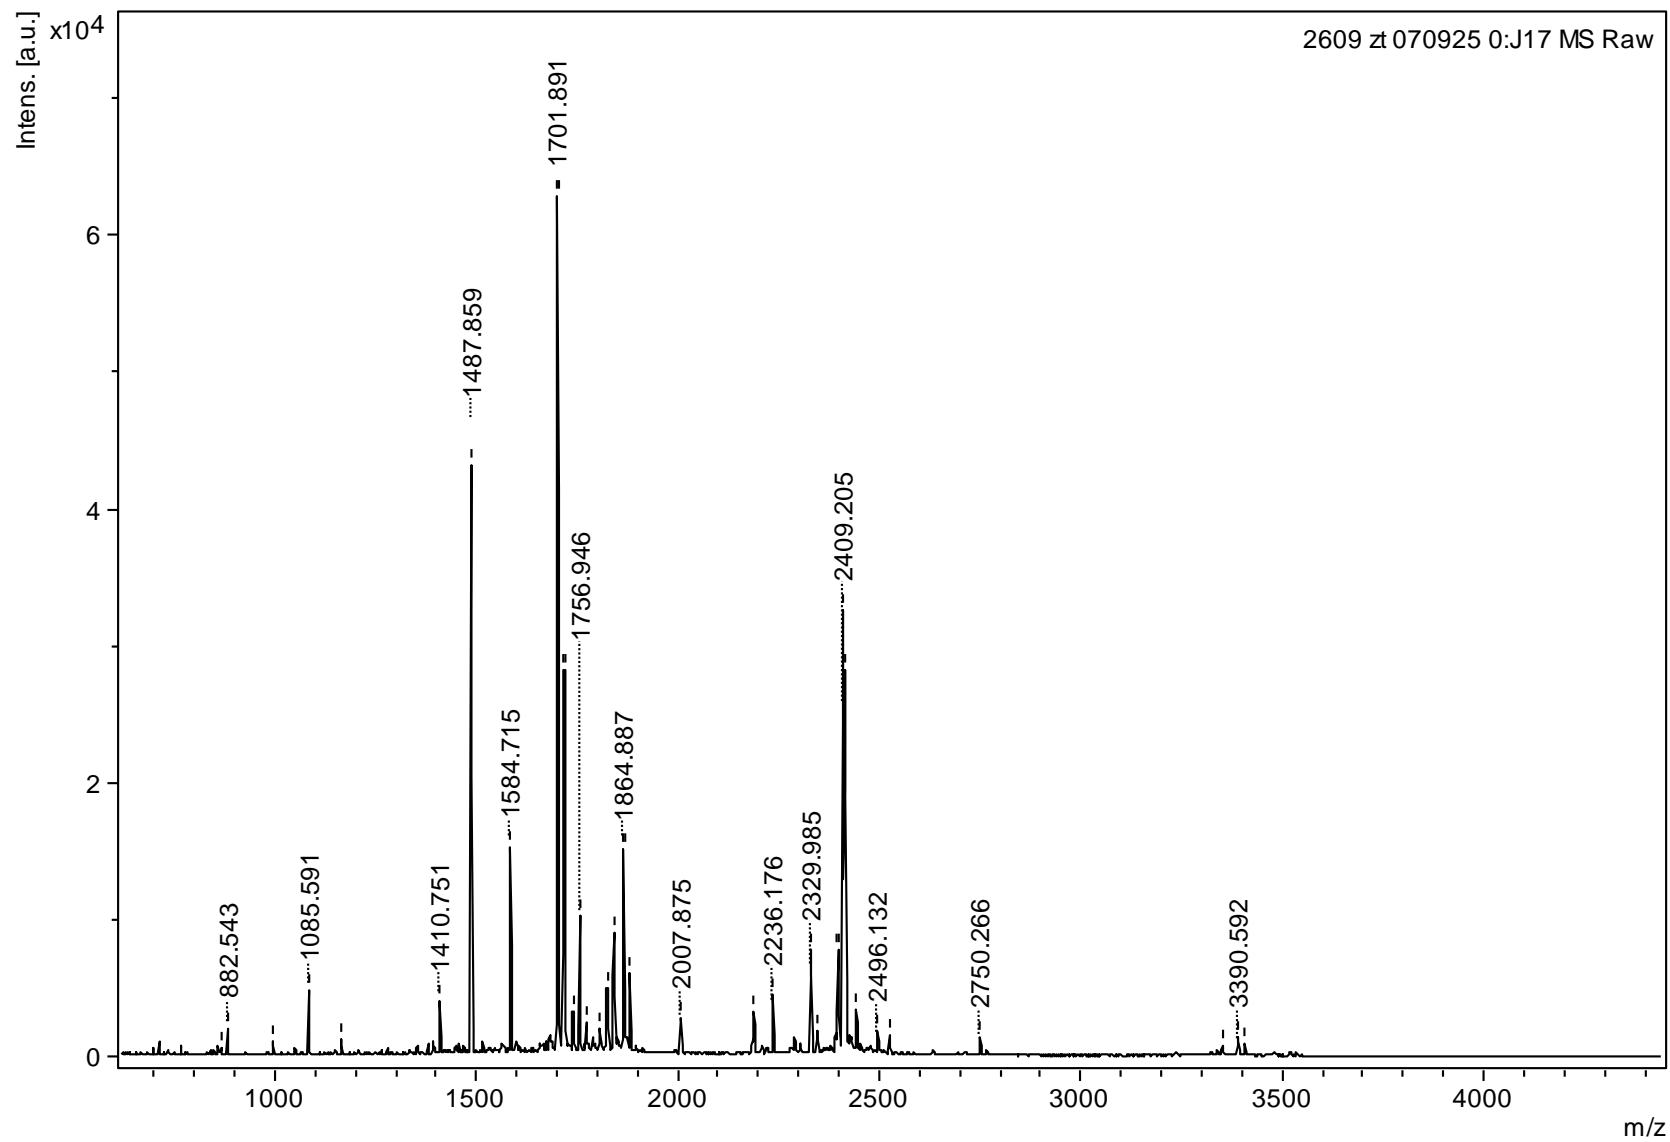

Supplemental figure 8x: Tubulin alpha, NP\_006073

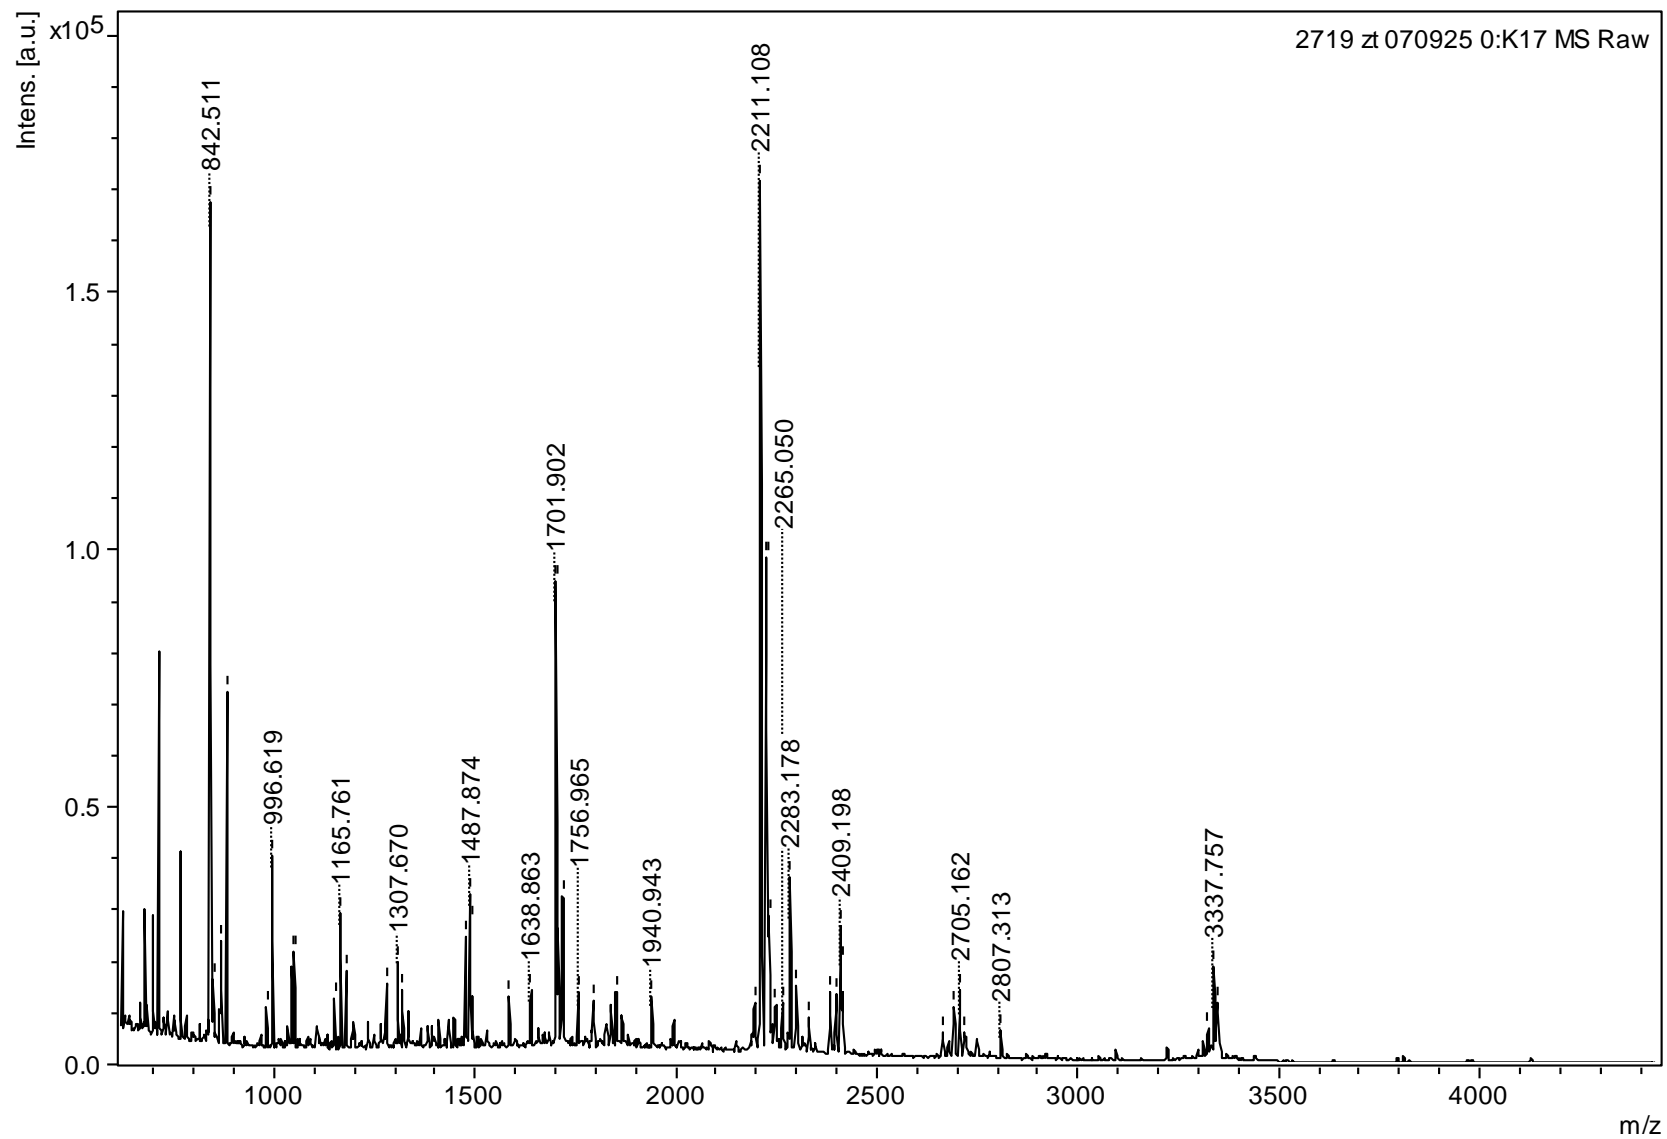

Supplemental figure 8y: Heterogeneous nuclear ribonucleoprotein H1, NP\_005511

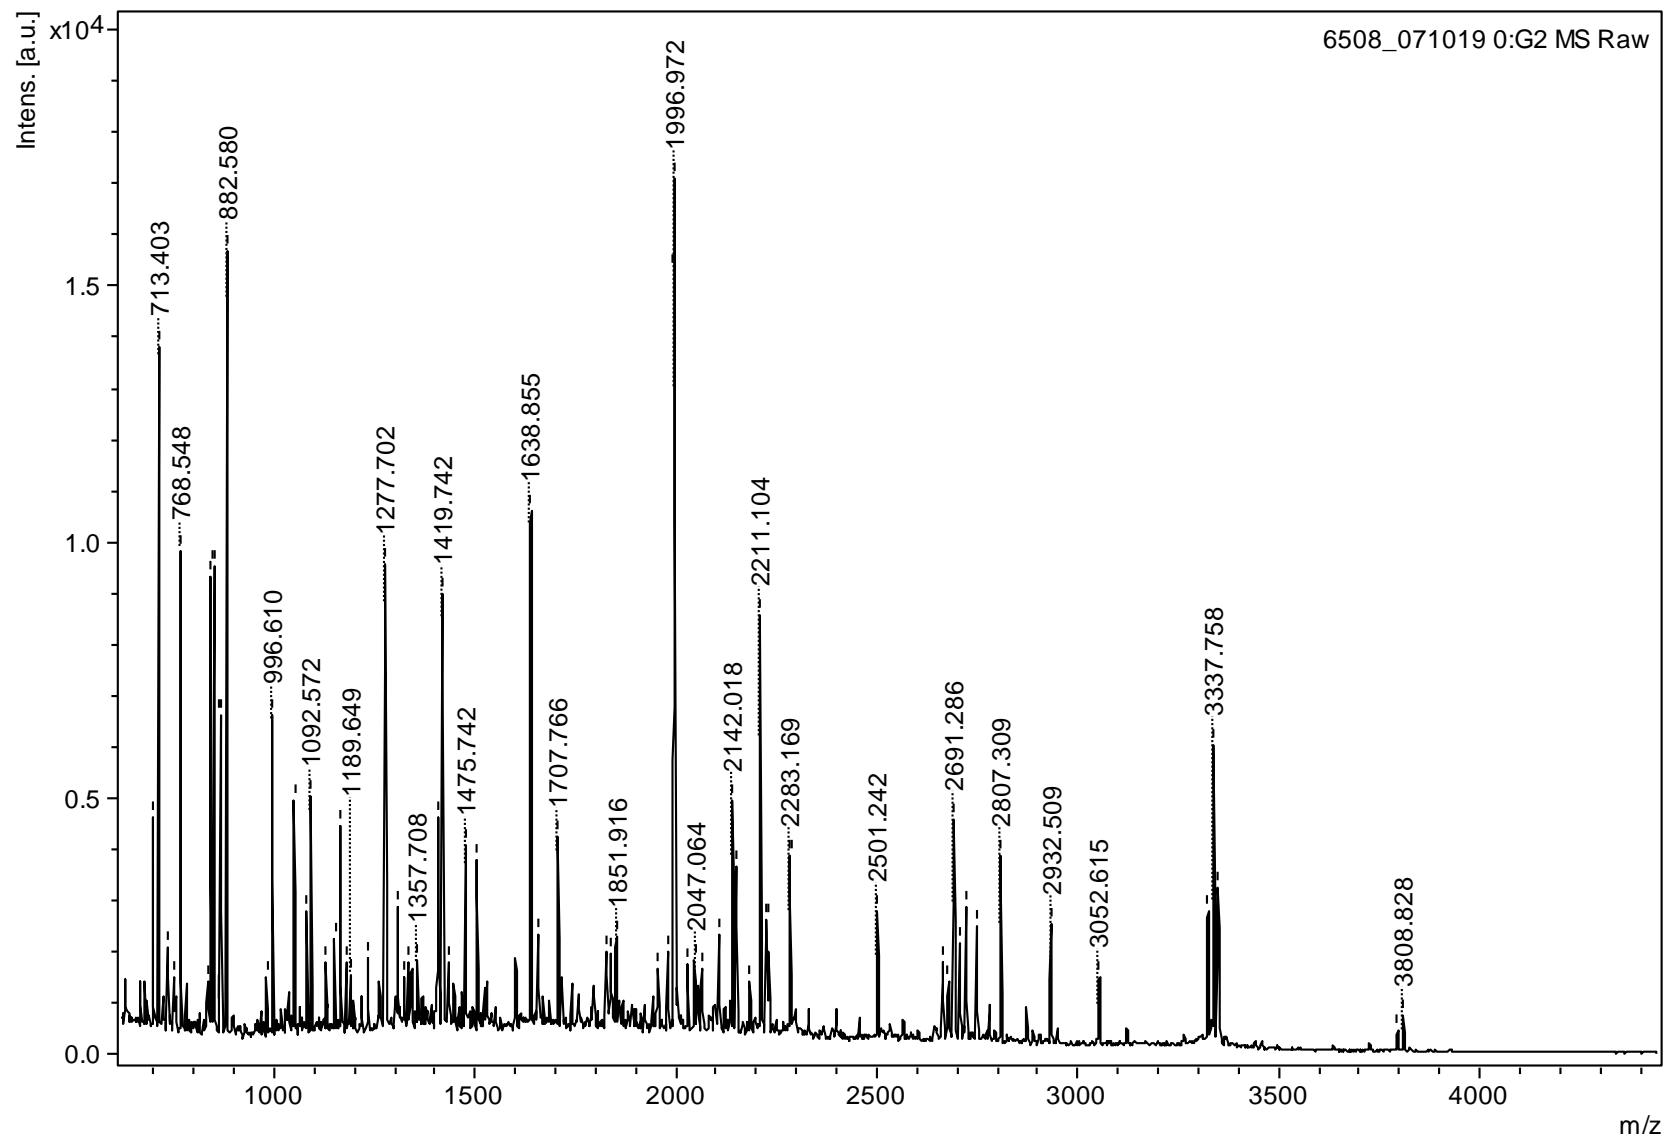

**Supplemental table 1**

| <b>Cell line Name</b> | <b>ATCC Number</b> | <b>Organ/ Tissue/ Source</b> | <b>Medium</b>                    | <b>FBS (%)</b> | <b>CO<sub>2</sub> (%)</b> |
|-----------------------|--------------------|------------------------------|----------------------------------|----------------|---------------------------|
| DLD-1                 | CCL-221            | colorectal adenocarcinoma    | RPMI 1640                        | 10             | -                         |
| HCT-116               | CCL-247            | colorectal carcinom          | McCoy's 5a                       | 10             | 5                         |
| LoVo                  | CCL-229            | colorectal adenocarcinoma    | Ham's F12K                       | 10             | -                         |
| Caco-2                | HTB-37             | colorectal adenocarcinoma    | Eagle Medium                     | 20             | 5                         |
| HT-29                 | HTB-38             | colorectal adenocarcinoma    | McCoy's 5a                       | 10             | 5                         |
| T84                   | CCL-248            | colorectal carcinoma         | 1:1 Dulbecco's Eagle / Ham's F12 | 5              | 5                         |
| COLO 201              | CCL-224            | colorectal adenocarcinoma    | RPMI 1640                        | 10             | -                         |



## Supplemental table 2a

| 14-3-3                                    | Nucleophism 1                             | Cytokeratin 9                         | Hemoglobin, beta                    | Thioredoxin-like 1                    |
|-------------------------------------------|-------------------------------------------|---------------------------------------|-------------------------------------|---------------------------------------|
| 750.506730974746                          | 842.509387160470                          | 670.561909961837                      | 842.497331373190                    | 842.509447262637                      |
| 768.524175887478                          | 850.543744823573                          | 713.395843536995                      | 868.560043772249                    | 850.551478690191                      |
| 781.575734011128                          | 868.556227868608                          | 815.659307217923                      | 882.590058147392                    | 868.566805127752                      |
| 842.485482795861                          | 882.578004235881                          | 842.509374856318                      | 927.501596113956                    | <b>872.540352212807</b><br>[196-202]  |
| 848.513773204952                          | 968.577483870693                          | 848.523957445786                      | 960.570467693782                    | 882.590081855154                      |
| 850.535780153883                          | 973.581363902053                          | 882.569460481021                      | 996.621084242867                    | 973.583468844828                      |
| 865.021882826552                          | 982.578485099208                          | 996.599115191256                      | 1165.764639060860                   | 982.594756192511                      |
| 868.536385316465                          | 996.603905706342                          | 1054.626822803020                     | <b>1274.730271977060</b><br>[32-41] | 996.618860710049                      |
| 882.565049773696                          | 1051.716156859490                         | 1165.741496969330                     | 1277.722708458420                   | 1045.586201085590                     |
| 982.578097243939                          | 1151.729083271470                         | 1274.719783873540                     | <b>1314.670288314710</b><br>[19-31] | 1051.726726739090                     |
| 996.599790881019                          | 1165.744651170810                         | 1279.767347962100                     | 1529.743209691250                   | 1073.542594331760                     |
| 1051.711710553930                         | 1198.668755475450                         | <b>1307.670570883370</b><br>[240-249] | 1580.798677235420                   | 1151.740916907550                     |
| 1133.712643731910                         | 1279.772998946280                         | 1428.770801676300                     | 1623.791138096230                   | 1165.756330580480                     |
| 1151.721330184890                         | 1341.638267712690                         | 1448.920900217110                     | 1638.882045933040                   | 1197.679864841260                     |
| 1165.745037029020                         | 1358.701950645000                         | 1529.745390586260                     | 1639.945587249980                   | 1277.721676802090                     |
| <b>1189.644024055850</b><br>[216-225]     | 1434.884340877660                         | 1638.855318416380                     | 1657.797726880400                   | 1279.790452019570                     |
| <b>1256.577460719770</b><br>[131-141]     | 1448.906140731610                         | <b>1707.775863566030</b><br>[46-62]   | 1707.776862862780                   | 1358.726673444260                     |
| 1274.715093394020                         | 1526.683927088410                         | 1792.995090548800                     | 1838.931599526500                   | 1403.804444550760                     |
| 1279.772815929250                         | 1534.899628338750                         | 1838.922700356690                     | 1853.911167026780                   | 1413.751480914260                     |
| 1334.895820859660                         | 1562.927285587040                         | <b>1851.927589170560</b><br>[321-335] | 1993.979356533270                   | 1475.754339164040                     |
| 1365.635119155600                         | <b>1568.759467645950</b><br>[33-45]       | 1993.975843878690                     | 2045.091149863910                   | 1621.778466446770                     |
| <b>1384.677715166880</b><br>[131-142]     | 1583.894534828110                         | 2150.073599808480                     | 2121.911975249020                   | 1638.857480164370                     |
| <b>1447.694482027630</b><br>[30-42]       | 1629.806694106700                         | 2211.111218829790                     | 2150.082352005460                   | 1707.771347813250                     |
| 1448.922531128960                         | 1638.844580336940                         | 2283.173628411890                     | 2211.104000000010                   | 1794.824554221060                     |
| 1498.832166354680                         | 1654.873558542890                         | 2399.006334709830                     | 2256.044647678250                   | <b>1890.960204010780</b><br>[86-102]  |
| 1513.830864703800                         | 1707.764210313890                         | 2501.245190043150                     | <b>2286.090480657870</b><br>[42-62] | 1993.975441512050                     |
| <b>1516.854442931150</b><br>[43-56]       | 1794.813996553390                         | 2663.275809259030                     | 2398.999678719120                   | 2180.077138310920                     |
| 1517.876040566880                         | 1801.826913844070                         | 2677.272406956880                     | 2501.251978513920                   | 2199.104753838380                     |
| 1524.693234866310                         | <b>1819.833608126240</b><br>[249-262]     | 2691.290177055820                     | 2542.267752062380                   | 2211.105597646950                     |
| 1532.835518151510                         | 1826.791808391380                         | <b>2705.178373452830</b><br>[63-94]   | 2552.311011821940                   | 2225.122653882610                     |
| 1545.869839606570                         | <b>1835.843584148580</b><br>[249-262] Mox | 2720.288358613960                     | 2562.278149521790                   | 2230.208867818090                     |
| 1603.782520906800                         | 1851.875219872130                         | 2748.311095215320                     | 2580.291923209190                   | 2283.179997395060                     |
| 1638.852622394700                         | <b>1947.931396284120</b><br>[249-263]     | 2779.975009158430                     | 2597.161533558570                   | 2378.108718998350                     |
| 1669.873868608610                         | 1993.979048682660                         | 2807.313885151510                     | 2688.150257000300                   | 2431.176582966970                     |
| 1707.771365050230                         | 2150.058862208310                         | 3323.746549249270                     | 2705.161306117410                   | <b>2450.207240510260</b><br>[260-280] |
| <b>1819.933625834870</b><br>[154-170]     | 2187.740614507340                         | 3337.758234023240                     | 2816.233998674650                   | 2465.200764237490                     |
| <b>1835.929334138480</b><br>[154-170] Mox | 2211.105374163080                         |                                       | 2872.396033072110                   | 2509.196092412700                     |
| 1993.976358252310                         | 2224.116091183200                         |                                       | 2902.415273324270                   | <b>2527.206450992800</b><br>[238-259] |
| 2211.105807452380                         | <b>2227.204291436710</b><br>[81-101]      |                                       | 2913.481366203690                   | 2550.285346626580                     |
| 2225.114589573970                         | <b>2243.202216922740</b><br>[81-101] Mox  |                                       | 2932.513758329190                   | <b>2568.306987433720</b><br>[212-234] |
| 2283.178703774990                         | 2283.178758206990                         |                                       | 3052.625511040470                   | 2705.169230006930                     |
| <b>2331.202284138310</b><br>[171-190]     | 2410.222360982850                         |                                       | 3264.520074955220                   | 2721.323937636960                     |
| <b>2336.217648021110</b><br>[30-50]       | 2501.230488033450                         |                                       | 3337.722625460330                   | 2872.395184290350                     |
| 2501.250786606510                         | 2573.195703491290                         |                                       |                                     | 2916.406128917930                     |
| 2541.233771080700                         | 2691.280415255910                         |                                       |                                     | 3052.623989407790                     |
| 2560.258944545470                         | 2705.158826185000                         |                                       |                                     | 3323.742995746890                     |
| 2588.265037103470                         | 2720.265654573350                         |                                       |                                     | 3337.757816191480                     |
| 2705.156878606450                         | 2807.355117124930                         |                                       |                                     | 3346.674436515730                     |
| 2872.389403581370                         | <b>2929.450553131130</b><br>[46-73]       |                                       |                                     |                                       |
| 2932.510770145090                         | 2938.504605006730                         |                                       |                                     |                                       |
| 2976.483275412880                         | 3337.758080466660                         |                                       |                                     |                                       |
| 3023.515333406150                         | 3440.563286713730                         |                                       |                                     |                                       |
| 3052.608838004080                         |                                           |                                       |                                     |                                       |

**Supplemental table 2a (continued)**

14-3-3  
(continued)

3258.613706212750

[197-225]

3274.619571656640

[197-225] Mox

3290.658160157960

3337.758030519690

3451.484580069210

[226-255]

## Supplemental table 2b

| Cytokeratin 19                 | Tubulin, alpha (SSP #2609)         | Tubulin, alpha (SSP #2719)     | HSP70 protein 8                | Capping protein muscle Z-line, alpha 1 |
|--------------------------------|------------------------------------|--------------------------------|--------------------------------|----------------------------------------|
| 842.509254814162               | 868.521937233698                   | 842.511463976082               | 842.509399999993               | 842.509400000002                       |
| 850.454595863234<br>[25-32]    | 882.543459723247                   | 850.556013863689               | 848.529184390050               | 850.551161065867                       |
| 882.563224355548               | 996.580342870177                   | 868.567900674880               | 850.553763991077               | 868.555575004895                       |
| 1029.579664341640<br>[189-197] | 1085.591485115620<br>[113-121]     | 882.590585146590               | 864.563046605503               | 882.582459820048                       |
| 1041.595854747860<br>[151-159] | 1165.725479120370                  | 982.601718882032               | 868.560561707662               | 996.612821778768                       |
| 1082.509327705800<br>[266-274] | 1410.750705020680<br>[85-96]       | 996.618743003758               | 882.584744334391               | 1036.530241100080                      |
| 1179.583139196830              | 1487.858710760510<br>[230-243]     | 1045.561444970950              | 982.589781504397               | 1051.722652212530                      |
| 1222.612052094120<br>[167-176] | 1584.714911343860<br>[340-352]     | 1051.730020034510              | 996.616042781472               | 1165.755632071270                      |
| 1250.616960292930              | 1585.334534564660                  | 1151.740639063200              | 1051.728478309710              | 1179.610183643060                      |
| 1365.675834613070<br>[371-381] | 1701.891445422420<br>[65-79]       | 1165.761039981390              | 1151.738404019400              | 1197.686370320610<br>[38-47]           |
| 1475.737618782080              | 1703.987479493620                  | 1179.599725372460              | 1165.759739967200              | 1225.631209364220                      |
| 1537.707429210680              | 1715.905761736140                  | 1279.787419906620              | 1179.610723582750              | 1274.716989001210                      |
| 1554.739042540800<br>[8-24]    | 1718.880131559650<br>[216-229]     | 1307.669669798460              | 1197.686714678450<br>[459-469] | 1279.779931072190                      |
| 1638.855312392900              | 1740.819433836540<br>[339-352]     | 1320.581806211970              | 1199.682421312680<br>[160-171] | 1307.672889518130                      |
| 1657.783825495240              | 1756.946213713230<br>[265-280]     | 1475.753970804620              | 1234.671589938130              | 1475.750418707590                      |
| 1674.762261825310<br>[126-138] | 1773.876276700730                  | 1487.873906059910<br>[230-243] | 1253.616171597160<br>[302-311] | 1638.856293165670                      |
| 1707.759526687560              | 1807.873041193030                  | 1493.732957494230              | 1277.708529525640              | 1657.786093189800                      |
| 1993.980423865050              | 1825.247318606680                  | 1584.745178315490<br>[340-352] | 1279.787995657310              | 1707.761344158790                      |
| 2047.061285612470              | 1841.994489147830<br>[106-121]     | 1638.863468792500              | 1323.674346486420              | 1722.792306554080                      |
| 2064.120162990960              | 1864.886549368480<br>[374-390]     | 1701.901685278080<br>[65-79]   | 1334.902292216660              | 1794.815861311800                      |
| 2211.099843943190              | 1869.972467173060                  | 1707.768300890390              | 1448.932939650240              | 1838.925273545680                      |
| 2399.114305032720              | 1880.888514957710<br>[374-390] Mox | 1718.881530985960<br>[216-229] | 1465.950167986470              | 1851.921148412830                      |
| 2407.301698150540<br>[331-353] | 2007.874722362520<br>[41-60]       | 1756.964626013220<br>[265-280] | 1475.746831090970              | 1993.972585019450                      |
| 2501.247833325220              | 2189.150972843740                  | 1794.823447722620              | 1479.727746041220              | 2089.005782259830<br>[20-37]           |
| 2872.401992511620              | 2236.175889566670                  | 1851.923774393690              | 1480.755255366130<br>[300-311] | 2211.103999999990                      |
| 2932.526008415280              | 2329.984553320150<br>[403-422]     | 1940.943410157420              | 1487.703580942860<br>[37-49]   | 2225.115625071480                      |
| 3052.629157761000              | 2345.988072136050<br>[403-422] Mox | 2196.280085701260              | 1534.682216051070              | 2245.062009348300<br>[67-86]           |
| 3337.758577358540              | 2395.124083159840                  | 2211.108201583590              | 1608.867824219800              | 2283.173750886130                      |
|                                | 2398.155156617120                  | 2225.122112280700              | 1638.867270636160              | 2286.108020228000                      |
|                                | 2401.360649741750                  | 2230.202281810450              | 1655.905360184660              | 2314.150222437820<br>[147-166]         |
|                                | 2409.204709180830<br>[244-264]     | 2233.083585334470              | 1657.783941778170              | 2383.944006230740                      |
|                                | 2414.199115073100                  | 2248.110428475470<br>[371-390] | 1707.770754722650              | 2399.010620104490                      |
|                                | 2416.204047963290                  | 2265.049501165730              | 1786.858601278760              | 2453.220342232110                      |
|                                | 2443.181206544510                  | 2283.178470962150              | 1787.968063145590<br>[172-188] | 2471.233009895120                      |
|                                | 2496.132244796500                  | 2297.189371313360              | 1794.819090743700              | 2487.222093383050                      |
|                                | 2525.167939818170                  | 2299.170373698990              | 1803.892502676640              | 2501.252807710680                      |
|                                | 2750.266411376970<br>[281-304]     | 2330.007436574250<br>[403-422] | 1838.936782468500              | 2705.157627747600                      |
|                                | 3350.846072974930                  | 2383.940276782350              | 1851.927044222870              | 2717.079616203820                      |
|                                | 3390.591509133590<br>[125-156]     | 2399.027384669210              | 1867.938612419630              | 2932.514894000700                      |
|                                | 3406.605219479390<br>[125-156] Mox | 2409.198431316700<br>[244-264] | 1981.995284095460<br>[138-155] | 3312.307520045280                      |
|                                |                                    | 2414.190280586900              | 1993.976636318330              | 3323.746695202000                      |
|                                |                                    | 2416.199137002910              | 2211.104000000020              | 3337.758000000010                      |
|                                |                                    | 2663.259173785890              | 2225.116420926760              |                                        |
|                                |                                    | 2691.285423200000              | 2265.037542727940              |                                        |
|                                |                                    | 2705.161792709400              | 2280.197335667450              |                                        |
|                                |                                    | 2717.089402820360              | 2283.181289512660              |                                        |
|                                |                                    | 2807.313499004620              | 2286.072424194990              |                                        |
|                                |                                    | 3323.746378101640              | 2399.004493458210              |                                        |
|                                |                                    | 3337.756993277490              | 2501.247182649180              |                                        |
|                                |                                    | 3346.683265670990              | 2584.211451524170              |                                        |
|                                |                                    |                                | 2705.153904369090              |                                        |
|                                |                                    |                                | 2756.298687762150              |                                        |

**Supplemental table 2b (continued)****HSP70 protein 8  
(continued)**

2774.320733238330  
[424-447]

2932.504529436900

3223.288789689340

3264.527382581240

3510.680760789980

## Supplemental table 2c

| Eukaryotic translation initiation factor 4 A, isoform 1 | Histone deacetylase 2                     | Peroxisredoxin 2                      | Proteasome 26S subunit                    | Cytokeratin 18                        |
|---------------------------------------------------------|-------------------------------------------|---------------------------------------|-------------------------------------------|---------------------------------------|
| 815.630244621692                                        | 842.509373980746                          | 842.509381702506                      | 842.509371899849                          | 842.509541095476                      |
| 842.494674537355                                        | 848.518801934968                          | 868.557960132080                      | 868.561305375996                          | 850.550667331475                      |
| <b>894.452241325880</b><br>[162-168]                    | 850.551592406836                          | 882.581593169515                      | 882.587700969264                          | 868.563235196947                      |
| <b>1050.527076177050</b><br>[162-169]                   | 868.553573011562                          | 982.596060309999                      | 996.614661138249                          | 882.586555641644                      |
| <b>1114.647795600380</b><br>[325-334]                   | 882.581862102981                          | 996.610228387124                      | 1051.728013000000                         | 982.599596742537                      |
| 1236.749272249510                                       | 996.610112425865                          | 1051.722375310970                     | <b>1153.592438699890</b><br>[331-339]     | 996.617321675477                      |
| <b>1555.700178730320</b><br>[178-190]                   | 1051.723378443310                         | 1151.734107476200                     | 1165.755363669520                         | <b>1041.604186801050</b><br>[144-152] |
| <b>1618.866758874780</b><br>[147-161]                   | <b>1160.563065862720</b><br>[222-230]     | 1165.753340331790                     | <b>1169.599310931770</b><br>[331-339] Mox | 1051.729835137350                     |
| 1638.848164261660                                       | 1165.753507134190                         | <b>1211.668505762290</b><br>[140-150] | <b>1583.745683113210</b><br>[59-70]       | 1151.740663765120                     |
| 1808.910268144820                                       | 1194.696215779640                         | 1268.736212386820                     | 1707.778621666970                         | 1165.761276869290                     |
| <b>1827.944114415470</b><br>[46-61]                     | 1274.721180919780                         | 1274.720006975280                     | 1794.822068815840                         | 1198.703910379820                     |
| 1855.932623720310                                       | 1279.780369115380                         | 1279.784361488870                     | <b>1982.006388620570</b><br>[253-270]     | 1277.704704662080                     |
| 1993.976700000030                                       | <b>1374.634697673790</b><br>[202-213]     | 1334.894370268440                     | <b>2025.996564554330</b><br>[231-247]     | 1279.787429515280                     |
| <b>2144.151550624040</b><br>[335-353]                   | 1529.765898353180                         | 1400.690856343160                     | 2042.030402202450                         | <b>1319.664487794080</b><br>[132-143] |
| 2155.153022654930                                       | <b>1607.833616101090</b><br>[38-50]       | 1434.901276663120                     | 2114.031950235760                         | <b>1419.746410052240</b><br>[353-364] |
| 2202.164509008010                                       | 1638.862646977090                         | 1448.915346816130                     | <b>2133.061792977560</b><br>[179-196]     | 1433.761493291720                     |
| 2211.103999999970                                       | 1684.903753609750                         | 1529.730161432440                     | 2211.107007505490                         | 1448.925906916900                     |
| 2284.183516030680                                       | 1707.789787379540                         | 1639.865810347350                     | 2225.117094734380                         | 1475.755381877020                     |
| <b>2439.123992847120</b><br>[119-141]                   | 1738.941544313550                         | 1657.795483425180                     | 2283.177044477550                         | <b>1506.746809191580</b><br>[296-308] |
| 2583.407239513450                                       | <b>1822.981200738200</b><br>[291-307]     | 1669.886119459370                     | <b>2469.188704974320</b><br>[133-154]     | 1638.859443125010                     |
| 2624.313674370010                                       | <b>1838.960486967710</b><br>[291-307] Mox | <b>1734.971386211000</b><br>[93-109]  | <b>2485.191053991270</b><br>[133-154] Mox | 1707.768562840840                     |
| 2721.292521279450                                       | 1993.976773873140                         | 1794.814630698120                     | <b>2512.226200730190</b><br>[227-247]     | 1794.821504849180                     |
| 2750.352981915490                                       | 2150.088184996760                         | 1826.789195858550                     | 2580.314660695800                         | 1837.942282735510                     |
| 2780.455975733460                                       | 2211.106784767890                         | <b>1863.061083075810</b><br>[92-109]  | 3323.737095077950                         | 1920.999819800980                     |
| <b>2797.405252170340</b><br>[383-406]                   | 2225.122912533130                         | 1940.925321850880                     | 3337.758176111690                         | 1993.972730354840                     |
| 2807.327212056950                                       | 2230.206689688130                         | 1993.971235374020                     |                                           | 2211.109893819300                     |
| 3337.758000000370                                       | 2283.177278178240                         | 2196.247783170890                     |                                           | 2225.117871209120                     |
| 3794.841942478550                                       | 2473.227965447460                         | 2211.105958330350                     |                                           | 2230.206636210460                     |
| 3808.847929938740                                       | 2663.278654698160                         | 2225.118534516080                     |                                           | 2283.178664525230                     |
|                                                         | <b>2678.278507194090</b><br>[171-193]     | 2230.208175994020                     |                                           | 2299.175131268350                     |
|                                                         | 2691.296754441530                         | 2265.038863300470                     |                                           | 2400.002674270610                     |
|                                                         | 2705.204510903580                         | 2283.178145288930                     |                                           | 2502.242642746880                     |
|                                                         | 2720.287100056530                         | 2297.188795860600                     |                                           | 2705.151572907540                     |
|                                                         | 2749.309656731330                         | 2299.166409451820                     |                                           | <b>2854.410993838440</b><br>[9-39]    |
|                                                         | 2807.324676399280                         | 2664.267473792210                     |                                           | 2932.473353722530                     |
|                                                         | 3323.757596488640                         | 2691.286074939150                     |                                           | 3323.743010164930                     |
|                                                         | 3337.758163067630                         | 2705.158249221940                     |                                           | 3337.757470232550                     |
|                                                         | 3346.665636191700                         | 2718.082104154340                     |                                           |                                       |
|                                                         | 3808.844682688060                         | 2749.302576409700                     |                                           |                                       |
|                                                         |                                           | 2780.435613898830                     |                                           |                                       |
|                                                         |                                           | 2808.317604905570                     |                                           |                                       |
|                                                         |                                           | 3323.743968847120                     |                                           |                                       |
|                                                         |                                           | 3337.758114674340                     |                                           |                                       |
|                                                         |                                           | 3346.680305743780                     |                                           |                                       |

## Supplemental table 2d

| Tripeptidyl peptidase I        | HSP70 protein 9                    | Aspartate beta-hydroxylase domain containing 2 | Cytokeratin 8                  | Heterogeneous nuclear ribonucleoprotein H1 |
|--------------------------------|------------------------------------|------------------------------------------------|--------------------------------|--------------------------------------------|
| 842.511126358023               | 670.558500186584                   | 658.381635305461<br>[253-258]                  | 620.358864959278               | 699.377804367870<br>[45-49]                |
| 868.562365933023               | 713.390952614086                   | 768.519037294287                               | 658.394281972488               | 713.403467594792                           |
| 882.584996032495               | 768.537818173863                   | 842.509344498723                               | 842.509259754351               | 734.462765081292                           |
| 982.602152959334               | 788.416898511688                   | 868.512316455509                               | 870.523396264825               | 750.527291563431                           |
| 996.613054666748               | 815.651640828034                   | 882.544868557340                               | 1081.556832055350<br>[9-18]    | 768.548022350232                           |
| 1045.561021746880              | 842.509367648643                   | 996.572845837745<br>[291-298]                  | 1129.601029123240<br>[353-362] | 835.485029396016                           |
| 1051.726730398830              | 882.568983692898                   | 1045.580390747510                              | 1277.711120045510<br>[342-352] | 842.509399999992                           |
| 1151.741186792030              | 1000.588998455780                  | 1051.701866306530                              | 1307.671595194070              | 848.512289639476                           |
| 1165.760600326690              | 1036.549353008850                  | 1131.610344494300                              | 1323.713091404890              | 850.527425732231                           |
| 1274.723830046000              | 1048.621016680050                  | 1151.691524535640                              | 1341.744131269700<br>[317-328] | 852.532084225168                           |
| 1279.784496675740              | 1132.663825045340                  | 1165.654571412800                              | 1344.694586457490<br>[329-341] | 864.542812070590                           |
| 1334.903294697650              | 1242.680869840870<br>[209-220]     | 1179.601930124160                              | 1369.749140766110              | 868.536497057609                           |
| 1419.746288379780              | 1274.723779376690                  | 1198.754395820090                              | 1400.695450595740              | 870.533118030609                           |
| 1434.905368290270              | 1277.706393381610                  | 1218.631215351870                              | 1419.770092843570<br>[214-225] | 882.580463931882                           |
| 1448.929632343310              | 1290.680125957860<br>[397-407]     | 1234.662961646720<br>[359-369]                 | 1475.739287816920              | 982.588050509538                           |
| 1467.833336441060              | 1343.721908808350                  | 1277.727322971170                              | 1638.850425841680              | 996.610481793245                           |
| 1474.754311079810<br>[3-16]    | 1361.743898482570<br>[351-362]     | 1309.669266848910                              | 1657.829142826740              | 1051.717554328230                          |
| 1529.736119932050              | 1375.727495026870                  | 1357.734595640310                              | 1707.779515795130              | 1082.591667762420                          |
| 1536.902714957890<br>[250-263] | 1400.681580126680                  | 1400.707786148540                              | 1847.826952944260<br>[134-148] | 1092.571754970300<br>[317-326]             |
| 1586.802486644660              | 1407.544402031710                  | 1434.773827172130<br>[126-136]                 | 1956.061578576230<br>[329-347] | 1129.603660207490                          |
| 1604.820188748150<br>[264-277] | 1434.766369418620                  | 1448.882071668290                              | 1993.980296777830              | 1151.731092655210                          |
| 1639.919352214580              | 1446.764875382150<br>[380-393]     | 1475.786877043550                              | 2003.922450119840<br>[134-149] | 1165.749958524950                          |
| 1707.784108575010              | 1450.720217717430<br>[88-101]      | 1638.854476429520                              | 2211.099985843760              | 1179.602979228040                          |
| 1794.819334579880              | 1462.758832273210<br>[380-393]     | 1657.848415963420                              | 2807.325865145390              | 1189.648711180780                          |
| 1826.795370853990              | 1475.755274117230                  | 1707.765065476790                              | 3323.796403407430              | 1234.665066743760                          |
| 1833.885667867940              | 1503.020970414780                  | 1716.812842376440                              | 3337.758557605180              | 1274.715374463530                          |
| 1940.945987495810              | 1517.849085081760<br>[351-363]     | 1838.897481502050                              | 3808.750352554140              | 1277.701993703020                          |
| 1982.949131031350<br>[205-222] | 1553.846346173790<br>[162-175]     | 1852.943919471290                              |                                | 1307.669201962550                          |
| 2211.106683758110              | 1592.957078729270<br>[501-515]     | 1993.978123488370                              |                                | 1323.693254818690                          |
| 2225.119142133570              | 1638.864271413410                  | 2211.102411310970                              |                                | 1334.892502655340                          |
| 2230.206349748380              | 1645.845847555410<br>[221-236]     | 2230.279083272700                              |                                | 1357.708236314810                          |
| 2233.093489886710              | 1657.799460416360                  | 2663.359395319430                              |                                | 1408.659129455770                          |
| 2249.071124696550              | 1674.861278504190                  | 2691.306233831690                              |                                | 1419.741764042740                          |
| 2283.179164259670              | 1694.852767066290<br>[190-204]     | 2748.330866577170                              |                                | 1434.788132725740                          |
| 2299.183077383210              | 1698.917672235120                  | 2807.301706085770                              |                                | 1475.741602067080                          |
| 2663.262797594690              | 1706.824644009790<br>[295-309]     | 3337.758220693640                              |                                | 1504.683484508030<br>[17-29]               |
| 2691.288815232240              | 1718.859452046560                  | 3369.435996090050                              |                                | 1638.854591205460                          |
| 2720.274758239310              | 1724.866143518650<br>[110-124]     | 3440.524904304720                              |                                | 1657.792353562880                          |
| 2748.311303631270              | 1752.864907588590                  |                                                |                                | 1707.766456879170                          |
| 2807.316199911390              | 1993.977529759690                  |                                                |                                | 1826.795946269790                          |
| 2949.351752395710              | 2056.955101044070                  |                                                |                                | 1838.922249829490                          |
| 3223.296631183790              | 2150.072846095330                  |                                                |                                | 1851.915806620300                          |
| 3323.745013691320              | 2211.103073940870                  |                                                |                                | 1956.016367848190                          |
| 3337.757303980880              | 2309.208349169210<br>[516-537]     |                                                |                                | 1979.977523330070                          |
| 3346.670471053210              | 2320.231356202150                  |                                                |                                | 1993.971711988370                          |
| 3354.762951486180              | 2338.264173311840<br>[494-515]     |                                                |                                | 1996.972373806650<br>[300-316]             |
| 3795.774358779930              | 2354.252027766050<br>[494-515] Mox |                                                |                                | 2028.958428072440                          |
| 3809.817392231320              | 2366.245251617560                  |                                                |                                | 2047.063926440660                          |
|                                | 2406.200614808900<br>[371-393]     |                                                |                                | 2064.113031198330                          |
|                                | 2422.199794545030<br>[371-393] Mox |                                                |                                | 2106.977207867200<br>[50-68]               |

**Supplemental table 2d (continued)**

| <b>HSP70 protein 9<br/>(continued)</b> | <b>Heterogeneous nuclear<br/>ribonucleoprotein H1<br/>(continued)</b> |
|----------------------------------------|-----------------------------------------------------------------------|
| 2691.288865819760                      | 2142.018220220460<br>[356-375]                                        |
| 2705.153445353620                      | 2150.071510137120                                                     |
| 2720.278884844440                      | 2184.102465166310                                                     |
| 2748.312855594790                      | 2211.104000000020                                                     |
| 2807.313439536160                      | 2225.115492877820                                                     |
| 2932.512316860940                      | 2230.193469854970                                                     |
| 3323.734010894070                      | 2283.168546033650                                                     |
| 3337.758128645840                      | 2286.113656303920                                                     |
|                                        | 2501.242129037360                                                     |
|                                        | 2663.266002974670                                                     |
|                                        | 2677.289033392010                                                     |
|                                        | 2691.285605848680                                                     |
|                                        | 2705.192160512350                                                     |
|                                        | 2720.270106346970                                                     |
|                                        | 2748.303734092790                                                     |
|                                        | 2807.308833804510                                                     |
|                                        | 2932.508902794600                                                     |
|                                        | 3052.614615471770                                                     |
|                                        | 3323.750659553380                                                     |
|                                        | 3337.757999999990                                                     |
|                                        | 3348.607227459420                                                     |
|                                        | 3794.822396622260                                                     |
|                                        | 3808.827819141030                                                     |

## Supplemental table 2e

| Decapping enzyme scavenger & Upstream binding protein 1 | Protein disulfide isomerase family A member 3 | Tissue specific transplantation antigen P35B | Seryl-tRNA-synthetase              | GNAS complex locus             |
|---------------------------------------------------------|-----------------------------------------------|----------------------------------------------|------------------------------------|--------------------------------|
| 679.465340494431                                        | 834.513770164313                              | 842.508610627300                             | 842.509340939768                   | 842.509391877895               |
| 699.375529060546                                        | 842.519676860717                              | 850.534552126170                             | 882.573149098836                   | 850.542588437109               |
| 713.396527049349                                        | 848.535229494765                              | 868.540598925432                             | 990.561117841936                   | 868.548939092624               |
| 768.542190775593                                        | 850.557339392614                              | 882.570017402716                             | 1074.505185971680<br>[294-302]     | 882.574222590017               |
| 821.483159140572<br>[316-322]                           | 864.563516204118                              | 911.465635283327<br>[291-297]                | 1277.709591189720                  | 982.592487680978               |
| 823.443723002823<br>[42-48]                             | 868.566495477565                              | 996.600098713994                             | 1307.675676412360                  | 996.603523485151               |
| 842.510487626914                                        | 882.586171285958                              | 1013.486741562240<br>[82-88]                 | 1332.750458473730                  | 1051.720552164200              |
| 850.541640716502                                        | 968.579732088056                              | 1051.707943209610                            | 1415.758086703030                  | 1065.626003057570              |
| 868.544247927616                                        | 982.597277414859                              | 1120.549688547540                            | 1465.533870581620                  | 1087.649029376290              |
| 870.538795813856                                        | 996.615462379069                              | 1151.720980348250                            | 1475.754545026500                  | 1120.540215203530              |
| 882.573265788870                                        | 1051.727856110660                             | 1165.742062793820                            | 1504.766959492390<br>[219-230]     | 1151.725245758970              |
| 927.492027483531                                        | 1058.570424480280                             | 1179.603275220230                            | 1510.788405103390<br>[282-293]     | 1165.748351647910              |
| 960.558879787972                                        | 1151.741078968910                             | 1234.674410075920                            | 1517.842922645350                  | 1185.685178016770              |
| 996.606308411580                                        | 1165.761184159780                             | 1274.719628835220                            | 1520.751313465360<br>[219-230] Mox | 1229.699326714210              |
| 1036.527973284180                                       | 1172.545307145280<br>[336-344]                | 1277.711132116970                            | 1522.717015989370                  | 1231.663230017460              |
| 1045.561555903720                                       | 1234.676938911260                             | 1279.767617618420                            | 1565.775245047380<br>[377-390]     | 1257.646368280350              |
| 1051.720714516970                                       | 1265.760415592180                             | 1307.674993003640                            | 1579.768293235800                  | 1274.713234244800              |
| 1165.749800485530                                       | 1274.724867181370                             | 1357.708609137560                            | 1638.861074890490                  | 1277.712582072450              |
| 1179.601441110830                                       | 1277.712477593300                             | 1434.815545000690                            | 1682.919082127720<br>[267-281]     | 1279.776389883130              |
| 1218.641409811890                                       | 1279.784060922590                             | 1475.751085058460                            | 1693.871668945610<br>[376-390]     | 1312.607449270820              |
| 1234.674379283120                                       | 1307.681593959150                             | 1489.735012463080<br>[200-214]               | 1707.778412179670                  | 1334.896927414850              |
| 1274.724958449720                                       | 1334.897151750370                             | 1521.684684850520                            | 1837.948784696760                  | 1357.721264235960              |
| 1277.706599488210                                       | 1341.693295275660<br>[449-460]                | 1638.862386447280                            | 1844.954569387590                  | 1415.756231397410              |
| 1279.765165205950                                       | 1352.685910190320                             | 1707.780415686950                            | 1851.926458212340                  | 1467.730617544590              |
| 1303.733209823080<br>[232-242]                          | 1357.712062261190                             | 1716.848424719000                            | 1993.977369430660                  | 1521.673060301390              |
| 1307.680092720930                                       | 1370.696809636610<br>[472-482]                | 1838.921335622040                            | 2150.083857182030                  | 1575.789100519880              |
| 1311.733888536560<br>[388-399]                          | 1419.738685234770                             | 1851.924781006660                            | 2211.106780409200                  | 1638.857136413300              |
| 1314.672177961280                                       | 1434.860111987580                             | 1946.068843379530<br>[61-78]                 | 2225.121657749140                  | 1707.767260116570              |
| 1357.718920124120                                       | 1448.922588063940                             | 1993.978265328150                            | 2230.205770182330                  | 1794.814953143920              |
| 1434.763304547300                                       | 1475.752234662780                             | 2135.103474850100                            | 2273.017574676420                  | 1796.822849597980              |
| 1467.844817294630                                       | 1497.744403932900                             | 2150.077385221210                            | 2283.176498861960                  | 1844.942597297640<br>[59-74]   |
| 1475.751331715070                                       | 1515.757022431220<br>[352-363]                | 2211.107299199650                            | 2286.119561040270                  | 1935.885053228890              |
| 1493.735971512620                                       | 1529.742532944330                             | 2225.119759592090                            | 2345.089250502430                  | 1968.944344466430              |
| 1519.832507993110<br>[425-436]<br>[243-255]             | 1543.754286892770                             | 2230.209288710090                            | 2501.250783722960                  | 1993.976365950600              |
| 1529.734355064040                                       | 1638.853939331620                             | 2283.176886301720                            | 2663.263123540370                  | 2024.009368649510<br>[198-214] |
| 1638.872651079080                                       | 1645.867847342470<br>[290-304]                | 2399.032847047370                            | 2677.270721888410                  | 2132.977580916330              |
| 1640.857452259400                                       | 1707.766790549730                             | 2501.248471606160                            | 2689.328173346340<br>[134-157]     | 2150.071267413300              |
| 1649.821921986160<br>[276-289]                          | 1794.802734028250                             | 2663.265538983970                            | 2692.290342592150                  | 2182.990542326000<br>[343-359] |
| 1657.789963701620<br>[14-28]                            | 1826.778320534770                             | 2677.288331414670                            | 2705.162101366260                  | 2211.106636023120              |
| 1707.770086483290                                       | 1838.912284095530                             | 2691.294514015920                            | 2720.282190194310                  | 2225.119675951960              |
| 1833.894839837310                                       | 1851.918071127870                             | 2705.180598360180                            | 2748.311960299870                  | 2233.084990787240              |
| 1838.927079688580                                       | 1993.968056557190<br>[21-38]                  | 2720.287934891810                            | 2807.311138281730                  | 2249.050496789710              |
| 1878.937501094050<br>[295-310]                          | 2136.093664342970                             | 2748.299838694940                            | 2932.512616368410                  | 2283.177825411390              |
| 1892.851941957760                                       | 2150.063227063800                             | 2807.316634622520                            | 3264.503714032730                  | 2286.060791690920              |
| 1899.989323142370                                       | 2184.106005670410                             | 2872.400641253170                            | 3323.734532389820                  | 2343.952141796550              |
| 1993.978544440370<br>[180-196]                          | 2211.089845055600                             | 2932.521010217940                            | 3337.758310347420                  | 2399.018248251940              |
| 2150.075125980270<br>[179-196]                          | 2225.108246677870                             | 3052.622941510170                            | 3348.597832727900                  | 2425.147852213440              |
| 2211.104623594450                                       | 2230.194113717480                             | 3323.754440191560                            |                                    | 2501.247149899940              |
| 2225.123115824980                                       | 2283.161362959950                             | 3337.758238543940                            |                                    | 2705.161548461380              |



## Supplemental table 2e (continued)

| Decapping enzyme scavenger & Upstream binding protein 1 (continued) | Protein disulfide isomerase family A. member 3 (continued) | Tissue specific transplantation antigen P35B (continued) | GNAS complex locus (continued) |
|---------------------------------------------------------------------|------------------------------------------------------------|----------------------------------------------------------|--------------------------------|
| 2230.211280680300                                                   | 2286.083035267890                                          | 3349.633453341440                                        | 2872.388486012870<br>[114-137] |
| 2256.042558409640                                                   | 2298.169394483450                                          | 3794.830102802510                                        | 3052.625878469050              |
| 2283.178402413280                                                   | 2398.994126608960                                          | 3808.820807943330                                        | 3323.748509065580              |
| 2292.107096945280                                                   | 2501.227820352800                                          |                                                          | 3337.758080734550              |
| 2297.186423144640                                                   | 2566.249020628890                                          |                                                          |                                |
| 2663.261878844250                                                   | 2575.277944138240<br>[306-329]                             |                                                          |                                |
| 2677.272938937200                                                   | 2584.179206786680                                          |                                                          |                                |
| 2691.291825162020                                                   | 2663.245618856290                                          |                                                          |                                |
| 2705.181880380450                                                   | 2691.261082362970                                          |                                                          |                                |
| 2709.297693230880                                                   | 2703.344183489000                                          |                                                          |                                |
| 2720.276660928390                                                   | 2705.128017863330                                          |                                                          |                                |
| 2723.237554000420                                                   | 2720.257031962280                                          |                                                          |                                |
| 2748.312256209200                                                   | 2748.278988818170                                          |                                                          |                                |
| 2759.384321292480                                                   | 2807.285489657230                                          |                                                          |                                |
| 2792.345772423680                                                   | 2872.368845339240                                          |                                                          |                                |
| 2807.314108349180                                                   | 2932.483161806710                                          |                                                          |                                |
| 2825.323937523750<br>[78-100]                                       | 3048.448612587650                                          |                                                          |                                |
| 2872.390697682100                                                   | 3052.595128642760                                          |                                                          |                                |
| 2921.341388776520                                                   | 3323.710745943370                                          |                                                          |                                |
| 2932.353756281110                                                   | 3337.724413782140                                          |                                                          |                                |
| 2935.465045991470                                                   | 3346.635651113530                                          |                                                          |                                |
| 2949.346198962860                                                   | 3457.600383550100                                          |                                                          |                                |
| 2967.343688167060                                                   | 3808.774715988830                                          |                                                          |                                |
| 2971.325974045040                                                   |                                                            |                                                          |                                |
| 3052.627961839410                                                   |                                                            |                                                          |                                |
| 3121.464521864390                                                   |                                                            |                                                          |                                |
| 3303.613854162270                                                   |                                                            |                                                          |                                |
| 3312.315485211710                                                   |                                                            |                                                          |                                |
| 3323.741604606700                                                   |                                                            |                                                          |                                |
| 3332.626383673300                                                   |                                                            |                                                          |                                |
| 3337.757944959490                                                   |                                                            |                                                          |                                |
| 3339.441365648880                                                   |                                                            |                                                          |                                |
| 3348.611772727880<br>[262-289]                                      |                                                            |                                                          |                                |
| 3353.680732627340                                                   |                                                            |                                                          |                                |
| 3366.611484603620                                                   |                                                            |                                                          |                                |
| 3794.820408357890                                                   |                                                            |                                                          |                                |
| 3808.833178736770                                                   |                                                            |                                                          |                                |
